# Supplementary material for: Allelic strengths of encephalopathy-associated UBA5 variants correlate between in vivo and in vitro assays
Source: eLife. 2023 Dec 11;12:RP89891. doi: 10.7554/eLife.89891 (PMC10712953; doi:10.7554/eLife.89891)
Supplement: Figure 4—figure supplement 1—source data 1. [file elife-89891-fig4-figsupp1-data1.xlsx]

## Sheet: Sheet1
	Samples	Bouton number	Bouton Area	Ave. Bouton Size
Ref	1	14	179.356	12.8111
	2	16	156.385	9.77406
	3	21	186.524	8.8821
	4	15	126.857	8.45713
	5	16	181.955	11.3722
	6	16	164.29	10.2681
	7	19	186.752	9.82905
	8	21	165.348	7.87371
	9	22	256.464	11.6575
	10	27	261.194	9.67385
Y53F	1	31	245.577	7.92184
	2	19	186.532	9.81747
	3	13	168.79	12.9838
	4	18	133.232	7.40178
	5	15	123.488	8.23253
	6	16	161.98	10.1237
	7	13	153.252	11.7886
	8	12	109.966	9.16383
	9	18	168.564	9.36467
	10	15	170.298	11.3532
M57V	1	18	193.776	10.7653
	2	14	90.935	6.49536
	3	19	178.339	9.38626
	4	15	140.766	9.3844
	5	18	200.655	11.1475
	6	20	186.234	9.3117
	7	18	238.98	13.2767
	8	20	236.553	11.8277
	9	22	227.53	10.3423
	10	23	285.24	12.4017
V260M	1	22	209.359	9.51632
	2	16	148.582	9.28637
	3	14	173.265	12.3761
	4	19	204.385	10.7571
	5	15	134.469	8.9646
	6	22	173.59	7.89045
	7	19	185.498	9.76305
	8	13	153.257	11.789
	9	16	158.859	9.92869
	10	16	167.541	10.4713
