# Supplementary material for: Allelic strengths of encephalopathy-associated UBA5 variants correlate between in vivo and in vitro assays
Source: eLife. 2023 Dec 11;12:RP89891. doi: 10.7554/eLife.89891 (PMC10712953; doi:10.7554/eLife.89891)
Supplement: Figure 4—source data 1. [file elife-89891-fig4-data1.xlsx]

## Sheet: Fig. 4A Mendelian Ratio
F0 cross: Uba5T2A/FM7a x UAS-UBA5
25 degree	F1 genotype: Y/FM7a; UAS-UBA5/+	F1 genotype: Y/Uba5T2A; UAS-UBA5/+	Mendelian ratio %		18 degree	F1 genotype: Y/FM7a; UAS-UBA5/+	F1 genotype: Y/Uba5T2A; UAS-UBA5/+	Mendelian ratio %		29 degree	F1 genotype: Y/FM7a; UAS-UBA5/+	F1 genotype: Y/Uba5T2A; UAS-UBA5/+	Mendelian ratio %
Ref	212	203	95.7547		Ref	112	121	108.036		Ref	143	134	93.7063
p.Y53F	105	89	84.7619		p.Y53F	100	75	75		p.Y53F	120	106	88.3333
p.R55H	150	0	0		p.R55H	143	0	0		p.R55H	143	0	0
p.M57V	120	89			p.M57V	110	58	52.7273		p.M57V	102	76	74.5098
	148	108	73.5075
p.R72C	157	144	91.7197		p.R72C	121	113	93.3884		p.R72C	138	127	92.029
p.G168E	175	0	0		p.G168E	166	0	0		p.G168E	98	0	0
p.R188X	159	0	0		p.R188X	125	0	0
p.C250A	152	0	0		p.C250A	104	0	0		p.C250A	114	0	0
p.V260M	167	145			p.V260M	119	55	46.2185		p.V260M	125	115	92
	128	135	94.9153
p.C303R	201	0	0		p.C303R	142	0	0		p.C303R	119	0	0
p.Q312L	114	118	103.509		p.Q312L	96	91	94.7917		p.Q312L	129	120	93.0233
p.A371T	189	204	107.937		p.A371T	150	161	107.333		p.A371T	134	130	97.0149
p.D389G	158	161	101.899		p.D389G	192	181	94.2708		p.D389G	112	113	100.893
p.D389Y	220	208	94.5455		p.D389Y	155	149	96.129		p.D389Y	153	142	92.8105

## Sheet: Fig. 4B Dev Timing course
Uba5T2A/Y; UAS-UBA5/+
25 degree	Ref			p.Y53F			p.M57V			p.R72C			p.V260M			p.Q312L			p.A371T			p.D389G			p.D389Y
Day 9	0	4	0	0	0	0	0	0	0	2	1	5	0	0	0	2	2	0	3	5	5	0	5	2	0	1	1
Day 10	19	32	14	5	8	8	0	4	6	23	25	30	3	2	2	15	18	19	30	21	24	17	25	20	14	15	22
Day 11	47	55	40	18	28	21	13	13	19	45	50	51	12	14	8	42	45	39	45	49	54	40	50	55	47	43	52
Day 12	51	63	45	37	40	29	25	21	30	47	54	59	34	28	26	47	50	44	46	50	57	45	52	67	52	45	54
Day 13		65		48	45	39	39	35	40	50		60	53	44	50			46		52				70	54	46
Day 14				60	49	43	44	40	41				60	49	52
Day 15						44	46		42				63
Total	51	65	45	60	49	44	46	40	42	50	54	60	63	49	52	47	50	46	46	52	57	45	52	70	54	46	54

## Sheet: Fig. 4C Lifespan
Uba5T2A/Y; UAS-UBA5/+
25 degree	Ref			p.Y53F			p.M57V			p.R72C			p.V260M			p.Q312L			p.A371T			p.D389G			p.D389Y
Day 10																									1
Day 12																	1					1
Day 14				1												1
Day 16							1	1			1									1		1				1
Day 18				1								1					1				1			1
Day 20					1		1					1						1
Day 22	1				1		1		1	1	2					1			1			1
Day 24						1		1					1		1					1				1	1
Day 26			1	1			1			1	1		1	1			1		1				2
Day 28					1	1	2	1	2					1					1	1
Day 30				1			1		2	1			1				1	1						1			1
Day 32	1			2	1	1	1	2			1			1	2	2			1						1
Day 34		1	1	1	3	2	3	2	4		1	1	2	3	1												1
Day 36				1			3	4	2	1	1		3	6	4		1	1			1		1
Day 38					3	1	7	9	5			2	9	4	5	1				1					1
Day 40	1			1	2	3	6	5	8	1	2		4	6	6		2					1	2			2	1
Day 42				2	1	1	3	4	5				4	4	5	1		3								1
Day 44		1	1	2	3	3		1	1	1			3		4	1	1	2				2		1	1
Day 46				4	3	4				1		1	2	3		2	2	2		1	2						1
Day 48				4	5	2								1	2	2	1	3		1	1		1		1	3
Day 50		1		5	4	6				1	3					3	2	1		1				2
Day 52		1	1	3	2	3				1		2				1		1			1		2		2		1
Day 54	1			1		1				2	1	4				4	6	2	1	1						2
Day 56	2	1	3			1										5	5	7	2			1	2	1	2	1	1
Day 58	1	2								2	1	3				2	2	1	1			2	1	3	1	3	5
Day 60	2	2	1							4	3	7				4	3	2	2				1			3
Day 62	4	3	2							2	3	5					1	1							4	1	4
Day 64		1	2							5	4	3						1		4		2	2	2	3	4	2
Day 66	3	6	4							2	2								1	1	3	4	3	1	3	2	3
Day 68	2	5	1							2	3							1	2	3		1		2	1	1	5
Day 70	4	4	7							2	1								4	5	9	5	4	3	3	2	3
Day 72	3	2	2																6	1	3	2	7	6	2	3	1
Day 74	3		4																1	2	5	5	1	2			1
Day 76	2																		5	2	4			4	2	1
Day 78																				2		2			1
Day 80																				2			1
Day 82																			1
Day 84
Total	30	30	30	30	30	30	30	30	30	30	30	30	30	30	30	30	30	30	30	30	30	30	30	30	30	30	30

## Sheet: Fig. 4D Climbing at Day 7
Climbing distance @ 30 sec
Canton S			UBA5 Reference			Y53F			M57V			R72C				V260M			Q312L			A371T			D389G			D389Y
Vial #1	Vial #2	Vial #3	Vial #1	Vial #2	Vial #3	Vial #1	Vial #2	Vial #3	Vial #1	Vial #2	Vial #3	Vial #1	Vial #2	Vial #3	Vial #4	Vial #1	Vial #2	Vial #3	Vial #1	Vial #2	Vial #3	Vial #1	Vial #2	Vial #3	Vial #1	Vial #2	Vial #3	Vial #1	Vial #2	Vial #3
0	6	0	18	18	18	0	0	0	18	18	18	2.5	2	0	0	18	18	18	0	0.5	2.5	0	6	8.5	10.5	8	8.5	0	5.5	8.5
7.5	10.5	4.5	18	18	18	0	0	0	18	18	18	7	5.5	0	2	18	18	18	0	1	2.5	6.5	6	9	12	14	15	9	8	11
14	11.5	10	18	18	18	0	0	0	18	18	18	7.5	6	0	2	18	16	18	0.5	3	5	12	8	16	14	14.5	15.5	10.5	12	13
15	13	11	18	18	18	0	0	0	16	18	18	8	7.5	0.5	3.5	18	14.5	18	2	4	7	12	14.5	18	15	16	18	15	13	13.5
16	15	12	18	17.5	18	0	0	0	16	16.5	18	8.5	8.5	1.5	5	18	13	18	2	7.5	7.5	12	15.5	18	15	16	18	15.5	13	14
16	15	12.5	18	17.5	17	0	0	0	15	16	18	9	9	6.5	5.5	16.5	7	15	2.5	7.5	8	12.5	16	18	15.5	18	18	17	18	14.5
17	16	15.5	18	17	17	0	0	0	14	15.5	17	10	11	9	7.5	16	6	14	3.5	8.5	8	13.5	16.5	18	16	18	18	17	18	15
18	16.5	16	18	17	16.5	0	0	0	12.5	13.5	17	10.5	12.5	9	8	15.5	6	13.5	5	9.5	8	13.5	18	18	16.5	18	18	17	18	15.5
18	17	16.5	17.5	15	16.5	0	0	1	4.5	13	16.5	13.5	13	13	14	15	5	9.5	6.5	12	9.5	13.5	18	18	17.5	18	18	17.5	18	16.5
18	17	17	16.5	14.5	16.5	0	0	1.5	2	10	16.5	13.5	16	14	16	14.5	4	9	7.5	12	9.5	14	18	18	18	18	18	18	18	16.5
18	18	17	16.5	13.5	16	0	1	2.5	0	7	16	14	16	14.5	17.5	13	2	2	7.5	13	10	14	18	18	18	18	18	18	18	18
18	18	17.5	16	13	16	0	1	2.5	0	2.5	15.5	14.5	16	15	18	3.5	0.5	0.5	8	14.5	10.5	15.5	18	18	18	18	18	18	18	18
18	18	18	16	11.5	13.5	0	2	3	0	0	7	15	18	16.5	18	3	0	0	9.5	15	11.5	16.5	18	18	18	18	18	18	18	18
18	18	18	14.5		12.5	0	2	3.5	0	0	2	15	18	17	18	0	0	0	9.5	15.5	13	17	18	18	18	18	18	18	18	18
18	18	18	7		11	0	2.5	4	0		0	15.5	18	17	18	0	0		10	15.5	16	18	18	18	18	18	18	18	18	18
18	18	18			2	0	2.5	4				16	18	18	18				10.5	16	17.5	18	18	18	18	18	18	18	18	18
18	18	18				1	2.5	5				16	18	18	18				12	16.5	18	18	18	18	18	18	18	18	18	18
18	18	18				1.5	2.5	6.5				17.5			18				13	17	18	18	18	18	18	18	18	18	18	18
18		18				2	3	7				17.5			18				13	17.5	18	18	18	18	18	18	18	18	18	18
18						2	3.5	7.5				18							15.5	17.5	18	18	18		18	18	18	18		18
						3	3.5	7.5				18							15.5	18	18					18
						3	4	7.5				18							16	18	18
						4	4	7.5				18							16	18	18
						4.5	5.5	8											16	18
						5	6	8											17	18
						5.5	6	8											18	18
						6	7.5	8											18	18
						6	7.5	8											18	18
						6.5	8	8.5											18	18
						7	8	8.5											18	18
						7	8.5	9											18	18
						8	8.5	9.5											18	18
						9	8.5	9.5											18
						9	8.5	10											18
						9	10	11											18
						12	10	11
						15	10.5	12
						16	11	13
						17	12.5	13
						17.5	14.5	18
						18	15	18
						18	17
						18	18
						18	18
						18
						18

## Sheet: Fig. 4D Climbing at Day 30
Climbing distance @ 30 sec
Canton S			UBA5 Reference			Y53F			M57V			R72C			V260M			Q312L			A371T			D389G			D389Y
Vial #1	Vial #2	Vial #3	Vial #1	Vial #2	Vial #3	Vial #1	Vial #2	Vial #3	Vial #1			Vial #1	Vial #2	Vial #3	Vial #1	Vial #2	Vial #3	Vial #1	Vial #2	Vial #3	Vial #1	Vial #2	Vial #3	Vial #1	Vial #2	Vial #3	Vial #1	Vial #2	Vial #3
2	0	6.5	18	18	18	8	8.5	8	0			11	10	8.5	0	8.5	0	9.5	8.5	18	18	18	18	18	18	18	18	18	18
5	0	6.5	18	18	18	3	2.5	4	0			9	10	8.5	0	0	0	9	8	7	18	18	18	18	18	18	17.5	18	18
5.5	5	8	18	18	18	1	2.5	4	0			9	8.5	8.5	0	0	0	9	8	6.5	18	18	18	18	18	18	17	18	18
5.5	5	8	18	18	18	0	2	4	0			8.5	8.5	8	0	0	0	8	8	6	18	18	18	18	16.5	18	16	18	18
6	5.5	12.5	18	17	18	0	0	3.5	0			8	8	8	0	0	0	7.5	8	6	18	17.5	18	18	16	18	16	18	18
7.5	6	14.5	17.5	17	18	0	0	3	0			8	8	7.5	0	0	0	7	6.5	4	18	17	18	17	15	18	15.5	18	18
9.5	7	15.5	17.5	15	18	0	0	3	0			6.5	7	7	0	0	0	3.5	5.5	3	18	16	13.5	16	14.5	18	14.5	18	17.5
12	8	16	17	14	17	0	0	2.5	0			4.5	7	7	0	0	0	3	4	2	17	16	13	14.5	13.5	17.5	14	16	13.5
13	9.5	16.5	17	13	16.5	0	0	0.5	0			4	7	7	0	0	0	3	3	0.5	15	11	12	14.5	12	16	12.5	15.5	12.5
13.5	12.5	17	16	13	14.5		0	0	0			3.5	7	6.5	0	0	0	2.5	3	0.5	12.5	9	12	14	11	9	9	14	12
14	12.5	17.5	16	9.5	13.5		0	0	0			3	7	4	0	0	0	1	2.5	0	9	9	11.5	13	8.5	9	8.5	13	12
15	13	17.5	9	9	12		0	0	0			3	6.5	3	0	0	0	0.5	2.5	0	9	8.5	8.5	8	6.5	7	8	12	5.5
15.5	13	18	8.5	8.5	9.5		0	0	0			2.5	6.5	2.5	0	0	0	0	2	0	7	3.5	2.5	6.5	6.5	5	5.5	8	3.5
15.5	15	18	1.5	5	8.5		0	0	0			0	6	2.5	0	0	0	0	1.5	0	4.5	3	1.5	2	1	0	2.5	8	0
15.5	1	18		0	4		0	0				0	6	2	0	0	0	0	0.5	0	2.5	1.5	0	0.5	1	0	2	0	0
16	16	18			2.5		0	0				0	5.5	2				0	0.5	0	2
16	16.5	18					0	0				0	5.5	0				0	0	0
17.5	16.5						0	0				0	5	0				0	0	0
17.5	16.5						0	0				0	4.5	0				0	0	0
17.5	17						0	0					4.5	0				0	0	0
18	17.5						0	0					4	0				0	0	0
18	17.5						0	0					4	0				0	0	0
18	17.5						0	0					4	0				0	0	0
18	18						0	0					3					0	0	0
18	18						0	0					3					0	0	0
18	18						0	0					2.5					0	0	0
18	18						0						2.5					0	0	0
18	18						0						2.5					0	0	0
	18						0						2					0
	18												2
	18												0
	18												0
	18												0
	18												0
	18												0
	18												0
													0
													0

## Sheet: Fig. 4E Bang Sensitivity
Recovery time after vortexing for 10 sec
Canton S			UBA5 Reference			Y53F			M57V			R72C			V260M				Q312L			A371T			D389G			D389Y
Vial #1	Vial #2	Vial #3	Vial #1	Vial #2	Vial #3	Vial #1	Vial #2	Vial #3	Vial #1	Vial #2	Vial #3	Vial #1	Vial #2	Vial #3	Vial #1	Vial #2	Vial #3	Vial #1	Vial #2	Vial #3	Vial #1	Vial #2	Vial #3	Vial #1	Vial #2	Vial #3	Vial #1	Vial #2	Vial #3	Rep 3
5	1	2	9	4	2	30	4	30	15	30	17	10	5	3	30	6	30	30	15	4	0	0	0	4	0	1	1	0	0	2
0	0	1	0	0	1	4	10	3	10	5	15	0	3	0	8	17	30	20	0	0	0	0	0	0	0	0	5	0	0	2
0	0	0	0	0	0	5	30	2	8	3	6	0	0	0	4	0	25	13	0	0	0	0	0	0	0	0	0	0	0	0
0	0	0	0	0	0	0	30	0	8	2	6	0	0	0	4	0	10	2	0	0	0	0	0	0	0	0	0	0	0	0
0	0	0	0	0	0	0	0	0	0	0	0	0	0	0	0	0	10	1	0	0	0	0	0	0	0	0	0	0	0	0
0	0	0	0	0	0	0	0	0	0	0	0	0	0	0	0	0	1	0	0	0	0	0	0	0	0	0	0	0	0	0
0	0	0		0	0	0	0	0	0	0	0	0	0	0					0	0	0	0	0		0	0	0	0	0	0
0	0	0				0	0	0				0	0						0	0	0					0	0	0	0
							0	0				0	0						0
							0	0				0	0						0
							0	0				0	0						0
							0	0					0						0
								0					0						0
													0						0
