# Supplementary material for: Allelic strengths of encephalopathy-associated UBA5 variants correlate between in vivo and in vitro assays
Source: eLife. 2023 Dec 11;12:RP89891. doi: 10.7554/eLife.89891 (PMC10712953; doi:10.7554/eLife.89891)
Supplement: Figure 6—source data 2. [file elife-89891-fig6-data2.xlsx]

## Sheet: Sheet1
	R72C			M57V			Q312L-1			Q312L-2			V260M			L254P			Y53F			R55H			D389Y			C250A			A371T			D389G			WT
	A1	B1	C1	A2	B2	C2	A3	B3	C3	A3	B3	C3	A4	B4	C4	A5	B5	C5	A6	B6	C6	A7	B7	C7	A8	B8	C8	A9	B9	C9	A10	B10	C10	A11	B11	C11	A12	B12	C12
Rep 1	43.668	43.767	43.867	48.259	47.461	47.86	36.481	34.385	35.183	48.259	47.96	48.159	44.865	43.967	45.065	44.666	44.267	44.965	45.165	44.766	44.965	45.364	45.165	45.564	44.466	44.765	45.364	45.564	44.965	45.464	45.064	45.164	45.364	45.064	44.565	43.966	45.663	45.763	46.561
Rep 2	44.578	44.877	44.578	47.472	46.873	47.372	34.5968	34.8962		46.8725	47.1719		45.3755	45.3755	44.9763	45.0764	44.5774	44.8768	45.276	45.1762	45.3758	45.5716	45.7712	44.7731	44.5735	44.9727	45.6714	46.0722	44.9744	44.9744	45.3736	45.673	45.9724	45.0756	45.5746	43.0797	46.1734	46.1734	45.375
Rep 3	44.6763	44.5765	44.5765	45.8739	47.6703	45.1753	36.9917	37.2911	38.1893	48.0696	47.4708	47.87	45.7742	45.375	44.4768	46.1733	45.375	44.6764	45.9737	44.9758	45.2752	45.7721	45.4727	45.7721	45.6723	45.2731	45.3729	45.7724	45.5728	46.471	45.7724	45.6726	46.5708	45.7731	45.4737	45.6733	45.8729	46.4717	45.7731
AVE 1		43.7673			47.86			35.3497			48.126			44.6323			44.6327			44.9653			45.3643			44.865			45.331			45.1973			44.5317			45.9957
AVE 2		44.6777			47.239			34.7465			47.0222			45.2424			44.8436			45.276			45.372			45.0725			45.3403			45.673			44.5767			45.9073
AVE 3		44.6098			46.2398			37.4907			47.8035			45.2087			45.4082			45.4082			45.6723			45.4395			45.9388			46.0053			45.64			46.0392
With ATP
	R72C			M57V			Q312L			V260M			L254P			Y53F			R55H			D389Y			C250A			A371T			D389G			WT
	E1	F1	G1	E2	F2	G2	E3	F3	G3	E4	F4	G4	E5	F5	G5	E6	F6	G6	E7	F7	G7	E8	F8	G8	E9	F9	G9	E10	F10	G10	E11	F11	G11	E12	F12	G12
Rep 1	56.544	56.943	57.143	53.949	53.549	53.649	55.046	55.745	56.045	51.353	50.754	50.555	49.058	49.557	49.158	50.256	50.355	50.056	50.954	50.155	50.155	58.639	58.839	58.739	54.447	54.746	54.247	58.639	58.339	58.539	58.838	58.838	58.439	58.639	58.639	58.439
Rep 2	56.9525	56.9525	56.0543	53.3598	53.4596	53.26	54.9565	55.3557	55.2559	51.164	50.8646	50.5652	48.9686	49.5674	48.769	50.266	50.3658	49.9666	50.1627	49.6637	50.0629	60.1435	60.2433	59.8441	54.655	54.3556	54.8546	59.645	59.9444	58.9464	58.5482	59.4464	58.9474	59.9454	59.147	59.646
Rep 3	57.1511	56.2529	56.5523	57.5503	53.758	53.8578	55.0557	55.4549	55.3551	51.1635	50.3651	50.4649	49.8658	48.6683	48.6683	50.265	50.3648	50.265	50.9618	50.5626	49.864	59.6445	59.3451	59.3451	54.455	53.956	53.956	58.946	59.3452	59.0458	59.0464	59.246	59.1462	59.246	59.5454	59.5454
AVE 1		56.8767			53.7157			55.612			50.8873			49.2577			50.2223			50.4213			58.739			54.48			58.5057			58.705			58.5723
AVE 2		56.6531			53.3598			55.1894			50.8646			49.1017			50.1995			49.9631			60.077			54.6217			59.5119			58.9807			59.5794
AVE 3		56.6521			55.0554			55.2886			50.6645			49.0674			50.2983			50.4628			59.4449			54.1224			59.1123			59.1462			59.4456

## Sheet: Sheet2
	R72C	M57V	Q312L-1	Q312L-2	V260M	L254P	Y53F	R55H	D389Y	C250A	D389G	A371T	WT
AVE 1	43.7673	47.86	35.3497	48.126	44.6323	44.6327	44.9653	45.3643	44.865	45.331	45.1973	44.5317	45.9957
AVE 2	44.6777	47.239	34.7465	47.0222	45.2424	44.8436	45.276	45.372	45.0725	45.3403	45.673	44.5767	45.9073
AVE 3	44.6098	46.2398	37.4907	47.8035	45.2087	45.4082	45.4082	45.6723	45.4395	45.9388	46.0053	45.64	46.0392
WITH ATP
	R72C	M57V		Q312L	V260M	L254P	Y53F	R55H	D389Y	C250A	D389G	A371T	WT
AVE 1	56.8767	53.7157		55.612	50.8873	49.2577	50.2223	50.4213	58.739	54.48	58.5057	58.705	58.5723
AVE 2	56.6531	53.3598		55.1894	50.8646	49.1017	50.1995	49.9631	60.077	54.6217	59.5119	58.9807	59.5794
AVE 3	56.6521	55.0554		55.2886	50.6645	49.0674	50.2983	50.4628	59.4449	54.1224	59.1123	59.1462	59.4456
DELTA ATP
	R72C	M57V	Q312L-1	Q312L-2	V260M	L254P	Y53F	R55H	D389Y	C250A	D389G	A371T	WT
	13.1093	5.85567	20.2623	7.486	6.255	4.625	5.257	5.057	13.874	9.149	13.3083	14.1733	12.5767
	11.9754	6.12079	20.4429	8.16717	5.62221	4.25812	4.92345	4.59115	15.0044	9.2814	13.8389	14.404	13.6722
	12.0424	8.81553	17.7979	7.48508	5.4558	3.65922	4.89005	4.79045	14.0054	8.18358	13.107	13.5061	13.4063
