# Supplementary material for: Allelic strengths of encephalopathy-associated UBA5 variants correlate between in vivo and in vitro assays
Source: eLife. 2023 Dec 11;12:RP89891. doi: 10.7554/eLife.89891 (PMC10712953; doi:10.7554/eLife.89891)
Supplement: Figure 7—source data 2. [file elife-89891-fig7-data2.xlsx]

## Sheet: Fig 7B
Time (min)	FP (Rep 1)	FP (Rep 2)	FP (Rep 3)
0	195	188	186.3
0.75	193.9	188.2	186
1.5	193.2	187	186.6
2.25	194.3	187.5	187.6
3	194.4	186.7	187
3.75	194.2	186.6	185.7
4.5	194.5	188.2	188.1
5.25	193.7	187.8	186
6	193.6	187.3	187.3
6.75	193.4	188.3	186
7.5	193.9	187	186.8
8.25	194.6	187.2	188.3
9	194.6	186.9	186.6
9.75	194.2	187.8	187.1
10.5	192.7	186.9	187.2
11.25	194.5	186.7	186.6
12	194.5	187.6	187.7
12.75	194	187.7	188.7
13.5	194.4	189	189.1
14.25	200.9	194.1	194.4
15	207.7	203.4	202.7
15.75	213.9	209.9	210
16.5	217.7	213.6	214.6
17.25	221.6	218.6	218.3
18	226.1	220.4	223.6
18.75	227.5	224.8	225.1
19.5	229.8	225.1	227.6
20.25	231.2	227.7	228.8
21	234.4	228.6	230.1
21.75	234.7	229.9	231.7
22.5	236.4	230	233.5
23.25	236.8	231.8	232.6
24	238.2	234.6	234.6
24.75	239.3	235.6	235.7
25.5	241.4	233.9	235.6
26.25	241.3	235.3	235
27	242.3	235.3	236.6
27.75	242	235.9	235.8
28.5	243.8	237.3	236.8
29.25	243.5	236.3	238.5
30	243.8	236.8	237
30.75	245	236.6	237.9
31.5	245.2	237.3	237.9
32.25	246.2	237.1	238.4
33	245.4	239.1	239.1
33.75	246.8	238.4	239
34.5	246.2	238.5	239.9
35.25	246.4	239.4	238.5
36	246.7	238.5	238.9
36.75	247.2	238.8	240.2
37.5	246.9	240.7	239.3
38.25	247.7	238.1	239.6
39	247.8	239.3	240.6
39.75	248.1	238.6	239.9
40.5	248.4	238	240.1
41.25	248	239.5	241
42	247.7	239	239.9
42.75	249.6	240.5	240.4
43.5	249.7	238.4	241.7
44.25	249.3	239.8	239.7
45	249.6	239.4	240.4
45.75	248	237.6	240
46.5	248.5	238.9	240
47.25	249.2	238.4	240.4
48	247.8	237.9	240.3
48.75	249.5	238.6	239.6
49.5	250.2	238.1	239.7
50.25	249.9	238.5	241.5
51	248	239.2	239.1
51.75	247.8	239.1	240.1
52.5	249.1	239.9	240.2
53.25	249.4	237.4	239.6
54	247.9	238.3	240.3
54.75	249.1	239.8	240.7
55.5	249.6	238.4	240.2
56.25	249.4	239.7	238.9
57	249	237.8	241
57.75	249.3	238.2	239.8
58.5	249.2	238.1	240.6
59.25	250.6	238	240.5
60	249.7	237.3	238.9
60.75	248.9	238.9	240.4
61.5	248	239.7	241
62.25	249.8	238.2	239.6
63	249.2	238.4	239.2
63.75	249	239	240.3
64.5	249.2	239.3	240
65.25	248	237.6	240.2
66	249.4	237.8	239.2
66.75	248.7	238.1	239.7
67.5	249.6	238.2	239.7
68.25	249.7	237.5	239.5
69	249.1	238.4	239.4
69.75	249.7	237.6	238.5
70.5	249.7	238.6	240
71.25	249.7	237.6	239.9
72	247.4	237.9	239.6
72.75	249.5	237.2	239.6
73.5	249.6	238.1	238
74.25	248.3	238.5	238.2
75	249.7	237.8	239.5
75.75	249.3	237.9	239.6
76.5	249	237.4	239.2
77.25	248.7	236.5	239.6
78	248.7	238.3	238.6
78.75	249.2	238.1	240.1
79.5	249	236.8	238.9
80.25	249.8	235.9	239.1
81	249.4	236.5	239.6
81.75	247.4	237.1	239.8
82.5	248.7	237.8	237.7
83.25	249	237.6	239.2
84	248.6	237.7	239
84.75	236.3	225.9	224.7
85.5	234.8	225.4	225.5
86.25	235.3	224.5	224.3
87	234.9	223.3	222.8
87.75	233.7	222.6	222.2
88.5	235.2	223	220.2
89.25	234.4	220.6	221.9
90	232.6	221.5	221.8
90.75	232.5	221.5	221.3
91.5	232.6	221	219.3
92.25	232.7	221.3	221.3
93	233.1	221.9	219.5
93.75	232.1	221.1	221.6
94.5	232.8	222	222
95.25	231.2	220.9	219.5
96	232.2	221.2	219.1
96.75	230.3	219.9	218.6
97.5	232.1	220.8	221.1
98.25	232.6	221	218.7
99	232.6	220.4	219.5
99.75	231.1	221.1	219.1
100.5	231.1	221.2	218.8
101.25	231.8	221.3	220.2
102	231.4	221	219.5
102.75	231.8	219.9	219.1
103.5	232.3	219.9	220.6
104.25	231.7	219.9	220.2
105	232.2	219.8	220.8
105.75	232.9	219.1	219
106.5	231.9	220.4	220
107.25	231.2	218.8	220.2
108	231.6	219.2	220.5
108.75	232.1	220.9	218.7
109.5	231.5	221.1	219
110.25	233.1	220.3	218.4
111	232	221.2	219.8
111.75	232.5	220	219.7
112.5	231.8	220.8	221.2
113.25	232.3	220	219.6
114	231.7	220.4	219.8
114.75	230.3	221	219.7
115.5	232.2	218.9	218.9
116.25	232.5	220.2	220.6
117	232.6	220.6	220.5
117.75	232	220.8	220.4
118.5	233	220.7	218.9
119.25	232.5	219.9	219.9
120	232.4	220.8	219.3
120.75	232	219.9	220
121.5	232.8	219.1	220.5
122.25	232.4	219.2	221.3
123	231.5	220.9	220.2
123.75	233.5	221.1	219.4
124.5	231.9	219.6	220
125.25	233.1	220.3	219.4
126	232.7	221.5	219.7
126.75	231.7	220.2	219.9
127.5	232.5	220.6	219.8
128.25	232.7	221	220.3
129	231.6	221.4	219.4
129.75	232.7	221.3	219.9
130.5	233.3	220.6	220.7
131.25	232.7	220.5	220.4
132	232.4	220.9	221
132.75	232.6	220.7	219.8
133.5	232.9	220.5	220.9
134.25	231.1	221	220.2
135	232.2	220.5	220.2
135.75	233.3	221.4	221.8
136.5	233	221.5	219.8
137.25	231.9	219.8	220.8
138	233.3	221	218.6
138.75	232.6	221.3	221.2
139.5	231.5	220.4	221.1
140.25	232.6	221.9	219.9
141	231.6	221	220.8
141.75	233.4	221.6	221.2
142.5	234	220.2	220.8
143.25	232.9	222	221.1
144	233.3	221.6	220.6
144.75	232.6	220.7	220.9
145.5	232.2	222.2	222.5
146.25	233.2	222.1	220.3
147	233.2	221.8	221
147.75	232.8	220	220.7
148.5	233.7	221.4	220.9
149.25	234.3	221.9	221.4
150	233.5	220.1	221.4
	224.8	224.8	224.8
	224.5	224.5	224.5
	225.4	225.4	225.4
	225	225	225
	225.3	225.3	225.3
	225.2	225.2	225.2
	224.7	224.7	224.7
	225.6	225.6	225.6
	225.2	225.2	225.2
	225.3	225.3	225.3
	224.5	224.5	224.5
	225.3	225.3	225.3
	225.8	225.8	225.8
	225	225	225
	225.8	225.8	225.8
	225.4	225.4	225.4
	225.2	225.2	225.2
	225.7	225.7	225.7
	225.5	225.5	225.5
	225.1	225.1	225.1
	224.4	224.4	224.4
	224.7	224.7	224.7
	225.4	225.4	225.4
	225.7	225.7	225.7
	224.5	224.5	224.5
	226.1	226.1	226.1
	225.2	225.2	225.2
	225.7	225.7	225.7
	225.5	225.5	225.5
	226.1	226.1	226.1
	226.3	226.3	226.3
	226.2	226.2	226.2
	226.5	226.5	226.5
	225.9	225.9	225.9
	225.9	225.9	225.9
	226.5	226.5	226.5
	226.1	226.1	226.1
	225.5	225.5	225.5
	226.3	226.3	226.3
	225.8	225.8	225.8
	225.8	225.8	225.8
	225.7	225.7	225.7
	226	226	226
	225.5	225.5	225.5
	225.5	225.5	225.5
	226	226	226
	226.5	226.5	226.5
	226.5	226.5	226.5
	226.7	226.7	226.7
	226.2	226.2	226.2
	226.1	226.1	226.1
	226.1	226.1	226.1
	226.1	226.1	226.1
	225.6	225.6	225.6
	225.6	225.6	225.6
	226.6	226.6	226.6
	226.5	226.5	226.5
	226.3	226.3	226.3
	226.4	226.4	226.4
	225.5	225.5	225.5
	227.5	227.5	227.5
	226.2	226.2	226.2
	227	227	227
	226.5	226.5	226.5
	227.1	227.1	227.1
	226.7	226.7	226.7
	227	227	227
	226.5	226.5	226.5
	226.7	226.7	226.7
	226.8	226.8	226.8
	226.6	226.6	226.6
	227	227	227
	226.8	226.8	226.8
	227.7	227.7	227.7
	228.6	228.6	228.6
	227.3	227.3	227.3
	227.1	227.1	227.1
	228	228	228
	227.9	227.9	227.9
	227.3	227.3	227.3
	226.8	226.8	226.8
	227.1	227.1	227.1
	226.8	226.8	226.8
	226.9	226.9	226.9
	227.9	227.9	227.9
	227.9	227.9	227.9
	227.3	227.3	227.3
	227.5	227.5	227.5
	227.7	227.7	227.7
	228.1	228.1	228.1
	227.2	227.2	227.2
	227.9	227.9	227.9
	227.3	227.3	227.3
	227.4	227.4	227.4
	227.6	227.6	227.6
	228.3	228.3	228.3
	228.4	228.4	228.4
	228.2	228.2	228.2
	228.1	228.1	228.1
	228.1	228.1	228.1
	228.2	228.2	228.2
	227.9	227.9	227.9
	227.8	227.8	227.8
	227.6	227.6	227.6
	229.1	229.1	229.1
	229.2	229.2	229.2
	228.8	228.8	228.8
	228.4	228.4	228.4
	229.3	229.3	229.3
	228.9	228.9	228.9
	228.8	228.8	228.8
	228.4	228.4	228.4
	228.1	228.1	228.1
	228.6	228.6	228.6
	227.9	227.9	227.9
	228.6	228.6	228.6
	228.1	228.1	228.1
	228.7	228.7	228.7
	229.4	229.4	229.4
	229.1	229.1	229.1
	229	229	229
	229.1	229.1	229.1
	228.7	228.7	228.7
	229.6	229.6	229.6
	229.5	229.5	229.5
	229.3	229.3	229.3
	230	230	230

## Sheet: Fig 7E-1
Time (min)	R72C			M57V			Q312L			V260M			L254P			Y53F			R55H			D389Y			C250A			A371T			D389G			WT
	Rep 1	Rep 2	Rep 3	Rep 1	Rep 2	Rep 3	Rep 1	Rep 2	Rep 3	Rep 1	Rep 2	Rep 3	Rep 1	Rep 2	Rep 3	Rep 1	Rep 2	Rep 3	Rep 1	Rep 2	Rep 3	Rep 1	Rep 2	Rep 3	Rep 1	Rep 2	Rep 3	Rep 1	Rep 2	Rep 3	Rep 1	Rep 2	Rep 3	Rep 1	Rep 2	Rep 3
0.75	191.1	191.8	193.4	189	191.2	192.5	185	189.5	191.5	184.6	188.3	188.9	186.7	181.9	185.5	189.1	190.4	188.2	188.6	190.2	190.5	188	189.7	188.6	185.7	187.8	187.8	186.8	182.4	186.5	187.3	188.5	188.6	187.1	187.2	188.6
1.5	190.8	191.4	193.3	188.9	191.7	191.7	185.1	189.4	192.2	185.8	186.7	189	186	183.4	184.8	189.2	190.7	188.2	189.3	189	190.9	187.9	188.9	188.9	184.6	186.1	189.1	187.8	181.8	185.2	187.1	188.6	189	186.2	186.4	188.2
2.25	191	193.8	192.3	190.1	191.2	192.1	186	189	192.1	183.9	187.8	189.9	186.1	181.7	184.7	190.4	189.5	188.2	188.5	190.1	191.5	186.7	188.8	189.1	184.1	187.1	188.8	187.4	181.7	185	185.5	188.7	188.3	187.2	185.4	187.8
3	190.7	193.4	193.5	189.2	192.2	191.7	185.7	190.9	191.2	186.6	187.9	187.7	185.4	181.1	183.7	190.2	190.7	188.4	186.6	189.6	190.7	187.1	189.1	187.5	186	186.7	188.6	187.2	180.4	185.6	186.9	188.2	188.9	186.6	184.6	187.4
3.75	188.5	193.1	191.8	189.8	190.8	191.5	185.5	189.9	190.7	185.8	188.7	189.8	184	183	185.5	189.6	191	188.6	188.5	190.7	190.5	187.4	187.6	188.5	184	187.8	188.5	186.6	181.9	184.1	186.1	187.9	189	186.1	186.9	188.9
4.5	191	193.1	193.1	188.8	191.5	192.4	185.3	190.6	191.2	184.5	187.3	189.2	184.4	183.7	183.8	189.4	190	187.9	189.1	190.3	189.8	187.3	188.2	189.8	183.4	187.9	188.7	187	181.5	184.7	186.6	187.7	189.2	186.4	187.4	188.1
5.25	189.8	192	193.4	189.3	190.7	190.1	184.9	190.5	190.7	184.6	186.6	189.8	185.9	183.2	185.1	189.3	191.2	190	189.2	189.1	190.2	185.9	187.2	188.9	184.6	188.3	188.4	187	182.9	185.6	185.3	188.5	188	186.8	187.9	187.1
6	188.7	192.1	192.8	188.4	191.4	192.1	185.4	189.6	190.4	186	187.5	188.7	183.9	182.2	184.1	189.6	191.1	189.2	189	189.1	189.6	186.6	188.3	189.8	184.8	186.7	188.2	187.4	182	184.7	186.8	188.1	188	186.1	186.4	187.9
6.75	190.2	191.8	190.9	188.7	190.7	191.2	183.6	189.2	190.7	183.7	187.8	191.9	183.8	182.5	185.1	191.3	189.8	188.6	188.2	189.3	190.8	187	188	189.4	183.5	187.3	189.5	187.4	183.2	185.4	186.5	188.7	187.2	186.1	186.5	187
7.5	189.3	192	193.5	188.4	191.3	191.6	184.5	191.9	191.6	183.9	187.5	189.4	186.6	183.2	185.4	188.5	189.9	189.6	189	188.9	190.6	185.2	188.7	188.8	184.4	187.2	188.1	186	182.2	184.8	186.5	186.7	189.1	186.7	186	186.7
8.25	191	192.9	192.7	188.2	191	191.7	184.7	189	192.6	184.6	188.3	189.1	185.4	183.5	184.1	190.7	189.7	188.3	189.1	188.5	190.7	187.1	188.5	188.6	184.2	187.9	187.3	187.3	181.8	185.1	186.2	186.4	189.6	184.6	186.6	188.2
9	190.5	192.1	193.3	187.7	192	190.9	184.9	190.4	191	186.2	187.2	190.3	186.2	183.4	183.9	189.4	190.8	188.6	187	189.7	189.4	187.3	188.4	188.9	183.5	187.7	188.4	187.8	181.9	184.9	186.2	187.9	188.9	185.9	186.8	187.8
9.75	190	192.6	193.8	189.2	190.3	190.6	185	189.2	190.5	186	187.3	188.7	185.9	183.2	185.2	188.9	189.8	188.4	189.8	190.3	190.3	186.7	187.9	189.5	184.7	186.9	189.3	188.3	182.3	186.3	186	187.3	189.9	185.2	186.7	188
10.5	191	192.2	192.8	188.1	190.7	191.2	183.6	189.9	191.4	184.8	187.9	190.5	184.5	182.2	183.6	188.6	189.8	188.4	189.1	189.4	189.5	187.2	187.1	188	185.7	187.6	188.7	187.2	181.4	184.7	187.1	188.4	189.3	184.1	187.5	187.8
11.25	196	201.3	204.4	198.5	208.9	215.8	195.4	205.8	207.8	189.8	190.8	193	189.9	186.5	185.8	198.4	205.2	203.8	194.9	192.5	193.3	196.5	202.6	203.5	192.3	191.3	191.8	204.8	205.8	213.2	198.6	206.6	208	204.9	216.1	218.7
12	198.1	205	206.9	207.1	215.1	219	201	211.3	212.5	189.3	194.2	194.7	188.6	185.6	185.9	202.7	208.4	207.2	193.8	193.5	193.4	199.5	206.6	207.5	190.5	193.4	191.5	213.1	211.8	220.7	201.2	210.8	213.1	212.1	221	223.6
12.75	201	208.6	209.5	213.5	218.8	224.9	206.7	213.7	216.1	190.3	194.2	193.7	188.8	184.9	186.9	205.3	211.1	210.9	193	193.4	193.4	201.4	207.6	212.1	189.9	191.9	191.7	217.5	213.9	223.7	204	212.7	215.3	215	224.5	228.3
13.5	205	210.9	213.7	220	222.3	227.9	213.2	217.2	219.8	189.9	194.8	194.8	188.5	185.7	187	208.9	214.8	214.7	194	191.2	193.9	204	212.2	213.4	190	191.1	190.6	223.3	216.2	227.9	210.1	215.6	219.8	221.2	228.4	231.3
14.25	206.1	213.6	216.6	226.1	224.9	230.8	217.6	220.2	223.1	191.9	197.4	197.8	189.4	185.8	187.1	211.4	215.6	217.5	192.8	194.3	194	208.2	214.1	216.5	191.8	190.4	190.7	227	220	231.2	211.2	219.6	222.1	225	231	236
15	210.4	214.1	218.3	229.9	225.8	233.6	219.7	222.2	225.6	193.1	198.4	200	186.8	185.1	186.5	213.6	219.1	220.4	192.7	192.8	193.1	210.7	214.4	220.4	189.5	190.6	190	230.5	223.4	233.6	214.1	222.5	226.5	228.2	235.2	237.5
15.75	215.3	215.1	221.9	233.9	227.7	235.1	223.9	224.7	228.1	196.1	199.9	199.4	187.9	185	185.6	215.8	221.4	224.3	191.8	192.2	192.6	211	217	223.2	189.2	191.2	190.7	234.7	223.7	236.4	218.9	223.3	228.8	232.6	236.3	239.3
16.5	217	218.2	224.7	236.7	229.3	238.3	225.6	227.1	229.3	196.4	200.3	200.4	187.9	183.6	187.7	217.8	222.6	225.6	194.2	192.9	191.6	211.7	219	225.1	189	190.5	190.9	237.8	224.9	237.5	219.1	225.2	232	234.8	238.2	241.5
17.25	220.3	219.1	225.8	238	230.9	239.5	229	228.2	231.6	197	201.9	201.2	189.6	184.4	185.9	219.8	224.1	228.2	195.4	194	193.1	214.4	218.9	226.1	188.9	190.2	189.8	239.6	226.9	240.3	223.2	226.7	233.1	236	240.6	242.9
18	223.1	220.8	229.8	239.9	231.6	242.4	231.3	230.2	233.1	199.5	204.7	202.7	187.2	184.5	186.6	221.1	225.8	229.1	193.1	194	192.9	214.8	222.4	228.7	189.2	191.1	190.2	241.8	230.1	240.4	224.4	228.3	235.7	239.9	240.9	243.4
18.75	225.5	221	229.8	241.2	233.9	241.3	232.2	232.1	233.5	200.6	204.1	204.1	187.8	184	186.8	222.5	225.4	230.2	193.4	194.2	193.5	218	221.9	231.1	188.4	190.7	190	244	231.1	242.5	226.7	230	237.4	238.5	241.5	244.4
19.5	226.7	222.6	231.6	244.3	234.4	243.5	233	232.4	235.6	201.5	203.7	205.1	186.7	185.5	185.3	224.9	227.7	232.3	194.1	194.6	192.8	216.8	223.9	232.5	188.8	189.9	189.9	244.9	233.4	243.3	227.6	230.6	237.8	241	242.9	245.8
20.25	229.4	223	233.9	244	234.7	246.1	234.7	235.3	236.6	201.7	205.8	204.8	188	183.9	185.3	226.2	229.3	233.7	192.5	193.5	193.3	217.4	223.4	233	188.6	190.5	190.1	246.5	234	243.8	230.4	231.6	241.5	242.2	245.7	246.8
21	231.6	225.5	235.6	244.2	235.2	246.6	237.2	235.9	237	203.5	206.1	208	188.1	185.4	185.9	228	229.9	235	193.7	194	193.8	220.4	226	234.4	187.9	190.8	190.5	247.7	233.3	243.8	232.3	232.9	243	242.5	246.1	247.5
21.75	233.6	224.2	238	246.7	236.9	247.3	237.7	236	239.2	204.1	206.5	207.9	188.7	183.8	186	229.3	230.4	235.9	194.3	194.3	192.9	221.5	226.2	236.4	187.1	189.6	188.7	248.9	233.7	247.2	232.8	234.6	243.3	244.4	247.3	249
22.5	234.6	226.4	238.8	247.4	237.6	248	239.3	237.6	237.7	205.1	207.3	211.2	188.1	184.1	185.4	229.4	231.7	237.1	193.7	193.4	193.5	222.1	227.8	236.7	187.7	188.3	188.9	248.9	236.1	245.6	233.8	235.9	244.9	246.4	248.2	250.8
23.25	235.2	226.2	239.7	249.5	239.4	247.4	240	237.6	240.8	206.7	209.5	211.2	188.3	185.3	185	228.6	231.5	238.2	193.8	194.2	193	223.2	226.9	238	187.3	188.9	189.4	250.3	234.7	245.3	235.3	236.7	244.6	247.6	247.5	251.1
24	236.7	225.3	240.7	249.6	239.4	249.4	242.4	239.6	241.4	206.6	210.3	214	188.2	186.2	184.6	229.9	232.7	240.4	193.2	194.2	194.8	222.9	228.2	238.9	187.7	190.3	189.1	253.3	235.8	247.7	235.9	236	245.6	247	250.3	251.8
24.75	239.3	227.7	241.9	249.4	239.9	249.1	243.4	239.1	241.8	210.8	210.7	214.5	187.2	185.1	184.4	229.8	233.6	240.3	194.4	194.6	195.5	225.6	226.9	240.2	188.7	189.8	191.4	253	238.6	247.6	237.7	238	247.2	247	249.3	252.7
25.5	239.9	228.7	243.1	248.7	240.9	250.7	243.4	239.7	244.5	210.4	211	215.2	187.9	183.8	186	232.2	233.7	240.5	194.3	197.4	193.7	224.6	230.1	241.4	186.7	188.9	189.3	254.3	237.6	248.6	237.3	239	246.5	248.5	249.1	252.4
26.25	240.4	229.7	242.7	250.1	241.1	251.4	243.7	240.1	243.9	211.5	213.3	217.1	187.9	182.7	185.1	233.8	235.4	241	193.5	195.4	192.7	224.9	229	243.3	186.9	189	189.5	253.2	238.7	248.5	239.5	239.2	246.4	249.7	250.7	253.1
27	242.7	230.6	245	251.3	241.2	251.1	244.9	240.2	244.4	211.4	213.4	218.8	186.9	183.7	186	232.8	235.1	243.6	194.3	194.7	194.5	226.9	231.3	243.6	186.9	190.9	190.5	253.6	239.4	248.3	238.8	239.7	249.2	249.9	251	254.2
27.75	243.1	230.9	245.1	250.2	243.4	252.4	245.6	240.7	245.2	213.3	213.8	220.9	188.7	184.1	184.4	234.3	234.2	243.5	194.3	194.7	193.6	227.6	232.6	244.3	188.3	189.5	190.5	253.2	238.8	250.6	239	240	248.6	249.7	252.4	254.3
28.5	242.6	230.1	245.9	251	241.7	252	245.3	242.7	246.1	214.4	214.8	221.3	187.7	184.5	186.6	235.1	235.2	244.8	194.5	193.9	194.9	227.4	232.2	247.2	187.3	189.2	190.3	253.8	239.3	249.1	241.3	239.6	250.6	250.9	252	254.2
29.25	245	231.1	246.9	252.3	244.1	253.1	246.6	241.8	248.2	217.3	216.6	222.6	187.7	184.6	186	235.8	237.1	242.7	195.9	196.3	194.9	228.1	232.8	245.2	187.9	188.5	190.2	252.9	241	249.9	242.4	240.8	250.5	251.8	252.1	253.8
30	244	231.5	248.7	251	243.3	254.4	248.1	242.5	245.6	216.2	214.8	223.7	189.5	185.1	185.8	235.3	237	244.5	194.9	195	195	227	232.4	247.4	186.6	189.2	188.2	254.6	241.1	250	244.1	241.4	250.2	250.8	253.7	254.7
30.75	247.2	232.4	249.1	251.7	243.4	254.6	247.2	244.1	247.1	219.6	216.7	225.8	188.3	184.8	185.6	236.5	237.8	245.3	194.1	196.4	194.7	227.7	233.1	247.7	186.1	189.7	189.1	255	240.7	249.5	241.8	241.4	250.2	251.7	252.2	254.7
31.5	245.9	233	248.2	252.6	243.4	253	247.9	243.8	247.7	219.6	217.3	227.3	188.2	185.1	185.5	238.2	238.5	245.1	194.6	196.8	196.3	228.5	234	248.3	187.6	190	190.1	255.6	242.8	251.2	242.6	242.7	251.6	252.3	253.4	256.2
32.25	245.8	232.7	248.8	253.3	244.1	254.5	246.8	243.6	247	221.1	219.4	225.8	188.4	184.7	184.8	239.3	237.6	246.9	194.9	194.6	194.3	229.8	233.6	248.3	186	189.2	189.4	254.5	240.2	250.3	244.8	243.5	251.4	253.1	254.2	256.9
33	247.8	233.2	250	254	244.1	254	250.3	243.6	248.4	221	218.6	228.8	188.3	184.8	185.3	238	240.2	245.9	194.3	195.5	195.8	231.1	234.1	250.1	186.4	189.3	189.3	256	241	250.8	244.6	242.7	252.9	253.1	253.7	255.8
33.75	248.6	232.7	250.4	253.1	245.2	254.9	248.8	244	248.7	223.2	218.3	228.8	186.9	183.4	186	238.3	239.4	247.2	196.2	194.6	196.7	230.1	235.1	249.5	186.3	189.8	189.2	257.7	242.2	251.3	245.2	243.1	252.4	253.6	255.3	255.9
34.5	247.2	234.8	251.4	252.7	245.1	256.5	251.1	244.8	249.1	224	221.1	229.7	189.1	185.8	188.4	240.3	241.2	245.5	194.8	195.9	197.1	231.7	234.7	249.8	186.6	189.2	189	258.5	242.3	249.5	246.2	244.2	251.5	254	254.7	256.9
35.25	246.4	236.1	250.2	252.5	245.9	256.9	249.3	246.3	249.3	224.2	222.5	229.9	188.2	184.4	186.6	241.3	239.8	247	195.1	195.9	197.1	230.7	235.9	249.5	186.1	189.1	189.7	256.6	241.2	248.6	246.7	244.6	251.4	253.1	253.3	256.5
36	246.8	234.9	251.3	252	246	256.7	251.5	245.7	249.4	223.9	221.3	232.7	188.2	184.1	186.5	241.8	240.7	246.2	193.9	197.4	197.1	232.1	236.1	249.2	187.2	188	188.6	256.6	242	249.8	246.7	244.6	253.8	254.7	253.7	255.7
36.75	248.1	234.7	251.6	252.3	244.8	256.5	249.4	245.5	249.5	224.9	222.6	233.6	188	184.3	186.5	242.2	240.5	246.4	195.6	196	196.9	233.3	236.4	249.7	184.8	188.3	189.5	257.4	241.9	251.2	248.2	245.5	252.2	255	253.9	256
37.5	249.7	236.8	252.3	253	246.2	256.5	249.4	246.1	251.2	225.8	222.4	234.7	188.1	183.8	186.9	242.1	241.8	247	194.8	196.1	194.9	233.1	235.9	249.7	186.8	188.6	189.7	257.2	243.7	252	247.8	244.8	252.9	255.9	255.4	257.4
38.25	247.3	237.3	253	251.9	247.6	258	249.4	246.2	250.6	227.8	225.4	234.6	188.5	184.5	186.8	243.9	241.7	247.9	194.8	196.9	195.8	233.8	236.1	248.7	186	188.6	189.6	258.8	243.2	252.2	247.9	245.4	252.6	253.6	255.3	257.7
39	249.4	237.1	252.5	251.9	245.2	256.2	249.7	246.7	252	229.1	224.3	236.1	187.6	185.9	184.9	243	243.4	246.2	196.2	197.5	197.2	232.2	235.6	251.3	186.4	188.6	189.5	258.4	242.4	249.3	246.8	245.9	252.9	254.8	254.5	256.6
39.75	249.1	238.4	252.1	252	244.6	257.3	249.7	246.4	251.8	230.7	225.8	235.9	188.9	183.8	186.2	244.4	242.9	246.8	197.7	196.8	195.3	234.6	237.9	250.1	186	189	189.9	258.9	243.8	252.3	247.6	246.5	253.7	254.1	255.1	255.9
40.5	249.7	238.8	251.8	252.4	247.9	257.2	251.4	248.1	252.9	230.1	224.4	235.2	187.4	184.5	186.2	245.8	242.6	248	196.1	195.9	195.6	235.4	238.5	250.6	187.1	188	188.8	257.9	243	250.8	249.3	247.2	254.9	254.6	255.4	256.7
41.25	248.7	238.5	252.2	252.8	247.3	255.7	250.7	247	253.7	228.8	226.4	235.1	189.2	185.2	187.1	245.3	244.5	246.8	196.3	196	195	235	238.1	251.3	185.9	189.4	189.1	259.7	242.6	252.3	250.9	246.3	253.6	255.1	256.3	257.1
42	249.8	239.3	252.7	253.4	246.9	257.2	249.8	248	252.8	231.4	226.5	234.8	188.5	184.2	186.6	245	243.5	246.8	196.8	196.8	196.8	235.9	238.1	250.1	186.8	187.5	187.1	258.4	243.8	252.2	249.4	245.9	253.6	254.7	254.2	256.7
42.75	250.2	239.2	252.6	252.2	248	257.6	250.3	247.1	253.3	230.5	229.8	236.4	188.8	184.1	185.8	246.7	242.5	246.9	196.5	196.4	196.4	237.8	238.7	250.7	187.6	189.5	189	258.7	243.2	252.3	250.2	247.1	254.7	254.9	255.7	259.1
43.5	250.3	239.7	252.4	252.5	247.7	256.6	251.9	248.1	252.8	231.3	229.2	236.4	188.2	184.8	186.2	246.6	243.4	247.2	196.8	196	194.2	236.1	238.6	251.2	186.6	188.7	189.4	257.8	244.3	253.6	251.2	247.2	253.6	257.1	256	257.4
44.25	250.1	239.8	252.3	251.6	248.5	254.7	249.4	247	253.7	231.4	229.6	236.9	188.7	184.6	187.2	246.7	242.3	247.8	195.8	195.9	194.7	238.7	237.8	253.1	186.3	188.4	190.4	258.4	243	253.3	252	247.9	255.2	255	255.2	258.6
45	248.9	240.7	252.3	253.4	249	256.2	250.3	248.7	253.9	231.1	230.8	235.9	188.7	185.7	186.7	247.3	245.1	247	196	196	196	238.4	240	251.2	185.7	188.5	190.5	256.6	243.1	254	250.4	247.9	253.1	255.7	256.4	257.4
45.75	249.7	240.7	253.4	253.1	247.4	257	251.3	248.5	253.1	231	230.6	237.7	187.5	184.3	187.9	246.6	244.1	247.4	196	197.5	195.6	238.7	240.7	250	185.3	189.4	189.2	259.1	243.7	253.5	251.2	247.9	255.2	255.4	256	258.5
46.5	250.4	241	252.8	252.2	247.4	256.5	250.6	248.7	253.4	231.5	232.6	237.7	189	184.5	188.1	246.4	245.4	246.5	195.3	196.8	196	238.4	240.6	250.9	187.2	188.5	188.7	258.4	244.7	254.4	249.7	248.1	254.3	255.4	255.9	257.3
47.25	252.1	241.2	253.6	253.1	248.4	256.2	251.1	248.4	252.8	232.7	233.2	236.3	189.4	184.9	188.4	245.5	245.1	245	196.2	195.9	195.6	239.1	242.1	251	186	188.2	189.2	258.5	243.3	253.7	251.3	249.2	253.6	255.7	255.8	257.9
48	250.1	243	254.2	252	249.5	255.6	250.1	249.9	254.9	234.3	234	238.6	189	185.3	188.9	245.7	247.3	245.7	196.3	196.7	195.6	239.7	240.5	252	184.9	188.6	190.1	260.1	244.4	252.9	251	249.4	254.3	255.5	255.2	259.1
48.75	251.1	243.6	253.4	252.3	249.4	258.1	249.3	250.6	254	233.4	235.9	239.7	189.7	186.7	187.8	245.1	246.5	246.8	196.4	196.9	195.9	242.1	242.4	251.3	187.2	189.5	188.7	258.3	244.1	253	251.2	250.2	254.8	255.5	256.5	257.3
49.5	250.1	243.9	253.5	253.1	250.3	256.5	249.7	250.7	254.2	233.7	236	238.5	189.3	184.7	186.6	245.3	246.8	246.1	195.6	196.5	197	241.5	242.2	251.5	185.4	188.3	188.9	258.1	244.7	252.8	251.4	249.4	254.2	256.1	257.1	258.4
50.25	250.3	243.9	253.7	251.7	249.5	255.3	250.3	250.7	253.7	234.6	235.8	240.1	188.4	185.4	186.7	247	247	245.7	196.2	196.9	196	243.1	244.2	251.4	188.8	190	188.8	259.3	245.4	253.9	251.8	249.2	254.5	255.5	255.9	257.2
51	250.5	244.7	253.6	251.1	249	255.8	250.5	250.5	254.2	234.4	234.9	238.5	188.2	184.5	185.7	246.2	246.3	248.1	196	197.2	196.2	243.5	243.2	251.2	186.7	188	188.6	259.3	244.4	252.2	251.7	249.7	254.2	255.2	255.5	258.2
51.75	250.9	246.7	254.8	252.2	249.8	256.2	248.8	251	254.3	235.3	235.1	240.6	187.8	185.1	187.2	246.4	247.6	244.8	194.4	195.7	195.4	243.7	244.3	252.2	185.6	186.8	189.1	258.6	244.8	252.2	249.9	249.6	254.3	256.6	254.7	257
52.5	250.9	245.4	253.2	250.1	251.3	255.5	249.4	251.1	253.4	235.9	235.7	240	189.3	186.2	186.7	246	245.1	245.2	196.6	197.1	195.6	243.5	246.3	252.3	185.6	189.2	187.7	259.3	245.1	254	249.8	249.8	254.7	256.1	255.9	258.6
53.25	249.3	246.7	252.9	250.7	252.5	253.7	248.7	250.9	253.2	234.3	237.1	240.7	188.8	185.7	187	245.5	247	246	196.8	197	194.6	244.6	246.1	251.4	187.3	189.6	188.6	259.4	244.5	253.8	252	250.1	255	256.4	255.9	258.2
54	249.4	247.6	254.4	249.1	251.5	256.1	250	250.2	254.1	235.2	235.4	241.2	188.4	185.3	187.7	246.9	246.4	244.5	195.8	196.5	197.2	244.5	245.6	251.1	187.2	187.6	187.1	260.1	245.6	253.4	252	249.3	255	255.7	256.2	258.2
54.75	250.6	248.1	253.6	250.5	251.4	255.3	248.9	252.4	254.4	235.7	236.6	240.7	188	186.2	188.2	246	246	245	195.5	196.6	197.2	245.8	246.6	250.6	185.3	187.7	188.9	259.9	245.3	252.8	251.4	250.5	254.7	257.4	256.2	259.2

## Sheet: Fig 7E-2
Time (min)	R72C			M57V			Q312L			V260M			L254P			Y53F			R55H			D389Y			C250A			D389G			A371T			Ref
	Rep 1	Rep 2	Rep 3	Rep 1	Rep 2	Rep 3	Rep 1	Rep 2	Rep 3	Rep 1	Rep 2	Rep 3	Rep 1	Rep 2	Rep 3	Rep 1	Rep 2	Rep 3	Rep 1	Rep 2	Rep 3	Rep 1	Rep 2	Rep 3	Rep 1	Rep 2	Rep 3	Rep 1	Rep 2	Rep 3	Rep 1	Rep 2	Rep 3	Rep 1	Rep 2	Rep 3
0.75	189.2	188.1	189.8	190.9	189.3	187.6	188.2	186.5	186	188.3	185.6	183.4	180.9	180.3	179.5	182.9	181.9	180.3	183.7	181.7	180.3	179.8	179.6	178	178.6	176.2	175.4	173.3	189.7	187.5	192.5	189.8	187.3	188.7	185.9	185.6
1.5	190.1	189.3	189.2	190.7	189.9	188.9	188.2	187.8	185.4	188.6	184.8	182.9	182	181.4	180.3	182.1	180.9	181.3	182.7	179.8	179	180.8	178.1	178.1	178.6	178.5	174.3	174.4	190.6	188.1	190.5	189	189.3	188.7	186.7	186.2
2.25	190.2	188.8	188.9	191.1	189.1	187.6	186.5	187.2	186.2	188.7	185	181.3	181.5	179.7	181.5	182.9	180.1	182.1	182.4	181.7	179.6	180.8	178.4	177.9	178.2	175.9	173.6	172.8	190.5	189.3	190.2	188.5	187.4	188.2	186	186.6
3	189.6	187.8	187.6	190.1	190.6	189	187.1	187.9	186.1	187.2	185.2	180.1	182.7	182.3	179.8	183	181.9	179.8	182.3	181.2	180.1	180.6	179.1	178.5	177.8	176.2	175.1	173.6	189.1	188.9	190.3	189.7	188.2	188	187.1	186.8
3.75	189.3	188.9	189	190.4	190.3	188.4	188.7	187.6	187.8	187.5	185.3	180.9	182.4	181.5	180.5	183.7	182.9	181.8	182	180.9	180.5	180.9	179	176.8	178.6	176.2	175.4	173.4	190.5	189.2	189.9	190	186.7	188.4	187.1	186.3
4.5	189.4	187.5	187.5	190.3	190.7	188.9	186.9	189	184.6	188.5	186.6	182.5	183.1	182.3	179.3	184.1	182.2	182	183.6	181.3	180.2	180.3	178.9	177.9	179	175.8	176.9	173.5	189.4	188.7	190.6	189.1	187.8	188	187.3	186.7
5.25	190.6	189.4	188	189.2	190.9	188.3	186.4	187.3	185.4	188.2	186.7	182.1	183.3	181	180.7	181.7	181.7	180.7	182.8	181.9	179.2	180.6	178.2	176.8	178.2	176.5	174.2	171.8	189.5	189.4	190.9	189.8	187.5	189.6	187.5	185.4
6	188.1	188.8	188.6	191.4	190.3	188.4	188.2	188.1	186.2	187.7	184.6	181.4	183.5	180.9	181.7	184	179.9	181.3	182.9	179.9	179.1	180.5	179.9	176.8	178.2	176.3	174.1	172.7	189.5	188.6	191.3	189	188.9	188.6	185.6	186.2
6.75	190	187.9	187.8	190.9	190.8	187.1	187.8	186.5	187.1	187.6	185.4	181.2	181.5	181.7	181.4	183.7	181.9	180	182.3	180.2	181.4	180.3	179.5	178.1	177.9	174.4	173.7	172.8	190.4	188	190.4	188.7	188	187.8	187.3	185.7
7.5	189.2	190.1	188.1	190.8	189.2	188.5	188.1	187.3	185.2	188.2	185.7	180.9	182.2	181.1	182.1	183	182.9	180.4	183	179.9	181.3	181.4	180.1	177.2	177.7	175.5	174.2	172.1	189.3	188.6	190.9	189.5	188.8	188.2	188.1	186.3
8.25	189.5	189.1	188.3	190.3	189.6	188.4	186.5	186.5	186.2	187.4	185.4	181.7	182	181.8	180.4	184.1	182.6	180.5	183.3	181.6	179.9	180.4	178	176.8	177.4	175.7	174.9	172.9	190	188.3	190.7	188.9	188.5	188	187.6	185
9	190	188.2	189.8	191.8	189.4	188.9	189	187.5	186.6	187.9	184.4	181.5	182.5	180.2	180.6	184.4	182.1	180.6	182.6	181.2	179.3	180.2	180.2	176.8	178	175.5	172.8	173.8	188.9	187.5	189.6	189.6	189.3	187.9	186.9	188
9.75	188.6	189.5	188.9	190.1	189.8	189.7	188.2	187.3	186.1	188.5	187.1	181.1	181.9	180.3	180	183.6	182.7	181.1	184	181.7	179.4	181.3	180.1	177.3	178.1	175.8	173.7	174.2	188.6	190.8	189.8	189.5	188.7	191	187.1	186.4
10.5	189.6	188.4	188.2	190.8	191.8	189.1	189.3	188	186.3	189.3	184.1	181.4	183.2	182.1	180.4	183.3	181.7	180.2	184.2	181.2	180.8	180.7	179.2	177.5	177.4	174.6	175.9	174.1	190.5	186.4	190.6	188.9	188.4	188.6	186.6	185.7
11.25	190.2	190.6	189.1	201.6	201.2	195.1	199.3	197.8	191.6	189	186.7	181.6	181.4	182.1	182.2	188.7	188.8	185.9	183.6	181.9	181.4	187	185.7	182.2	177.5	177.3	173.5	173.5	191.9	189.1	220.7	209	204.6	215.3	203.3	198.6
12	192.6	192.1	187.9	203.1	203.3	199.8	203.1	200.6	194	187.9	186.2	182.3	180.6	181.3	180.5	191.6	190.9	188.6	183.3	183.2	180.5	188.6	187.9	184.3	177.7	177.6	173.1	175	193.7	189.8	227.8	214.9	207.4	221.7	206.4	203.6
12.75	192.5	193.5	191.8	205.8	204.7	203.8	206.8	200.7	196.6	188.9	186.9	182.7	181.9	181.3	179.5	191.9	190.3	189.4	182.6	181.3	181	188.9	190.4	185	177.1	177.2	173.8	174.1	193.9	191.4	233.2	217.5	210.8	227.2	209.4	204.3
13.5	192.5	194.2	191.7	207.5	206.4	206.1	211.2	203.3	200.4	189.7	188.3	183.3	182.8	180.3	179.8	192.5	191.5	191.5	183.2	182.5	181.1	191.8	190.9	186	177.2	178.3	174.5	176.6	195.6	191.8	237.8	219.5	215.1	230.5	214.1	208.1
14.25	193.7	195.1	193	210.3	209.9	209.1	214.4	206.2	201.6	189	188.3	184.8	181.4	181.7	179.8	194.7	192.7	192.3	183.1	181.5	181.5	193.4	192	190.4	177.4	177.3	173.1	177.7	196.6	193.2	242.1	223.6	218.9	236	218.1	210.3
15	194.9	195.1	194	212.1	210	211.8	216.6	207.8	203.7	191.2	188.4	186.8	180.3	182.5	179.3	195.9	193.9	194.2	182.9	182	180.6	194.2	194.8	190.6	176.8	178.5	173.6	178	197.6	193.7	244.4	225	222.3	236.8	219.6	212.9
15.75	195.9	197.4	194.2	213.9	210.6	213.9	218.4	209.2	205	191.1	189.7	186.9	181.2	182.3	179.8	197.2	196.7	193.4	184.2	183.5	181.3	195.1	194.5	192.2	176	176.1	174.6	179.2	198.3	195.9	247.4	228.7	223.9	240.8	222.8	214.4
16.5	196.6	197.8	195.4	214.3	213.3	215.7	220.8	212	207.3	193.9	190.2	186.1	181	180.2	179.5	197	198.1	195.2	183.9	181.9	179.1	195.7	196.4	194.4	176.9	177.2	171.7	180.7	199	196.3	250	229.4	225.7	242.9	224.7	217.2
17.25	197.7	197.9	197.9	215.5	214.1	216	221.2	211.2	208.6	193.2	192.4	188.6	178.8	180.6	180.6	198.8	198.6	196.3	183.1	183.9	179.1	196.2	197.6	195.1	176.4	177.2	172.1	180.8	199.5	198.4	250.2	231.5	228.5	244.2	226.4	217.2
18	199.8	198.6	198.2	217.8	216.2	220.4	222.4	213.1	210.7	192.4	192.4	190.1	180.3	181.7	180.5	200.1	199	198.8	183.7	181.6	180.6	197.4	198.5	196.4	175.7	177.3	172.9	179.8	201	197.8	252.7	234.1	230.5	245.3	227	219.4
18.75	199.4	199.8	199.6	218.4	216.4	221.9	224.4	212.4	212.1	193.2	195	190.2	180.3	180.7	179.5	200.5	200.5	198.5	183.5	181.9	180.4	198.3	199.8	197.1	176.2	175.9	172.8	181.9	201.6	199.2	254	235.2	232.6	246.4	229.3	221.2
19.5	200.4	201.3	200.9	217.7	218	222.1	225.7	216	213.2	195.5	193.9	191.5	181.4	180.7	179.4	201	200.9	199.4	185.6	182.3	179.4	198.1	202.4	198.4	175.2	177.3	173	181.9	202.6	199.6	254.9	235.4	233.3	247.9	231.8	222.9
20.25	201.2	201.9	201.9	220.6	218.6	222.3	226.4	216.7	214.2	195.5	195.2	191.5	180.1	180	179.1	199.8	202.2	201.3	182.3	181.6	181.4	199.6	201.8	200.4	176	176.5	173	183.5	202.5	199.8	256.7	238	235.7	247.5	232.8	224.2
21	201.2	201.1	201.8	219.9	219.7	226.3	228.4	217	216.2	195.3	196.1	191.8	180.5	179.6	181.1	202.8	202.2	201.5	183	183	181	201.1	204.7	202.2	176.5	175.6	174.4	184.1	202.9	200.3	256.4	238.9	236	249.7	233.5	225.9
21.75	202.4	202.2	204	223	219.4	225.6	230.2	217.2	216.9	196.8	196.7	193.6	180.9	179.9	178.7	202.6	204.7	202	184.2	181.9	181	201.6	205.3	202.6	176.4	175.8	171.9	183.1	205.2	201.1	256.8	239.8	238.2	249.4	234.7	225.5
22.5	202.2	203.9	204.2	221.6	220	227.6	229.5	218.6	218.6	196.2	197.6	193.9	179.6	181	180	204.5	203.3	204.5	184.3	182.7	179.6	202.7	205.8	202.5	175.2	175.8	172.5	187.4	205.6	204	258.3	239.8	239.1	250.5	234.7	227.1
23.25	202.8	204	205.7	222.9	222.7	227.8	231.5	219.6	219.8	197.7	197.8	195	179.8	180.7	179	204.4	206	203.4	184.3	184.3	179.9	203.4	206.2	203.3	176.5	177.3	172.7	184.7	206	204	257.5	243.4	240	251.7	237.4	228.3
24	203.3	204.2	206.2	223.2	222.7	230	232.2	219.9	220.9	198.4	199.8	195.7	181.3	178.9	180.7	204.9	207.1	203.9	184.1	183	179.7	202.7	206.2	204.5	175.8	175.3	173.2	186.2	205.9	204	260.5	243.3	241.9	251.3	238.3	228
24.75	204.1	204.3	206.7	224.2	223.5	229.1	231.5	221	221.2	198.4	199.1	195.1	180.1	180.6	178.9	205.4	207.7	203.8	182.7	183.3	180.8	202.9	207.3	205.5	175.3	174.5	172.6	186.7	208.4	203.9	260.5	244.6	243.9	253.1	238.5	229.9
25.5	204.5	205.2	206.4	225.2	224	231	233.4	221.4	222.8	199.1	200.1	197.7	180.6	180.8	179.4	207	209.2	205.6	183.4	183.1	181.1	205	209.3	207.2	175.5	176.8	174.3	188.5	207.4	203.8	259.5	244.7	243.1	252.9	239	230.6
26.25	205.1	205	208.8	226.3	224.7	232.2	234.4	221.5	222.9	200.3	199.9	198.5	179.9	179.7	178.7	204.9	208.1	205.3	183.9	184	181.8	203	209.4	206.7	176.2	175.9	171.4	187.9	208.7	205.8	260.7	245.9	243	252.7	238.8	231.6
27	205.4	205.9	208.3	226.7	224.5	231.8	235	221.8	225	200.9	202.1	198.6	179.7	180.4	179.3	206.5	209.5	207.3	184.6	183.1	182.5	206.6	211.1	207.2	175	176.2	172.7	189.2	209.7	206.4	259.6	245.3	245.1	253.6	240.4	233.6
27.75	205.2	206.1	209.8	228	225	233.6	234.8	223	223.4	202.9	201.3	198.9	180.7	180.7	179.7	208	209.7	205.7	184.2	183.5	181.2	204.7	208.6	207.3	175.4	176.4	173.7	188.3	209.4	205.1	259.6	247.7	246.6	252.8	240.2	231.8
28.5	205.8	206	210.8	228.1	227.4	233.8	236.2	223.9	225.2	202.3	203.5	198.8	179.9	180.8	180.6	207.4	211.2	206.2	183	183.2	181.4	206.6	210.3	207.9	175.3	176.5	171.8	190.1	211	207.3	261.3	248.8	246.8	254.2	241.1	232.5
29.25	205.9	207.6	211.6	227.6	226.7	234.3	236.3	224.3	224.5	203.5	204.2	200.5	180.3	180	180.1	208.5	211.6	207.4	182.2	183.1	181.8	206.3	210.7	209.5	176.2	175.9	170.7	192.3	210.3	207.3	260.3	249.1	246.4	254.9	243.1	233.2
30	205.6	207.9	211.6	229.8	227.5	235.1	236.2	224.9	227.3	203.7	204.8	199.2	179.8	181.2	179	208.8	210.6	208.7	183.4	182.8	181.4	207.4	212.8	209.7	176.5	175	171.7	190.2	209.8	206.4	262.1	249.5	248.1	254.1	241.8	231.5
30.75	206.9	208.9	212	229.7	228.5	236.6	237.9	224	227.8	204.2	205.4	201.4	180.3	180.8	181.8	208.8	210.6	209.7	183.8	184.5	182.4	208.1	211	210.6	176	174.3	171.7	192.4	212.3	207.8	261.6	250.3	249.1	255.2	242.6	233.4
31.5	207.2	208.8	213.4	229.9	228.3	236.2	238.7	225.9	228.3	205.7	204.5	202.8	180	180	180.8	208.5	213.1	209.4	184.7	183.2	183	208	213.6	211.8	175	175.8	172.3	192.2	211.5	208.2	262.2	251.1	249.2	254.6	244.3	233.4
32.25	207.9	209.8	213.1	230.9	228.1	236.1	237.9	227.6	228.5	207	206.6	202.2	181.4	181.7	180.7	209.7	212.2	209.7	183.6	183.6	182	208.2	213.7	212.4	174.2	177.4	172.2	192.9	212.6	208.8	262.6	249.5	249.4	254	244.3	234.4
33	208.1	209.6	213.2	231.4	229	237.3	238.2	226.9	229.3	206.9	207.6	202.5	181	179.4	179.8	209.6	212.7	210.1	183.7	183.2	180.6	208.7	213.8	212.8	176.3	175.6	172.4	194	212	210	261	250.6	249.4	254.3	244.7	235.4
33.75	209.2	209.6	213.1	230.9	229.8	235.8	240.6	226.9	229.4	207.3	206.8	203.7	178.7	181.4	180.3	209.8	212.7	210	184.2	183.8	181.5	210.3	213.2	212.1	176.4	175.8	171.8	194.7	213.3	209.3	261.5	251.1	249.8	254.6	245.3	235
34.5	210.2	208.8	213.9	230.8	231.3	237.6	239.5	227.3	231	208.2	208.1	203.8	179.5	179.6	179.9	210.9	213	210.1	184.3	183.6	181.5	207.9	215.4	213	173.8	175.7	172.5	195.3	213.3	210.5	260.2	250.1	249.9	255.7	244.8	236.5
35.25	208.1	210.8	215.5	233	230.4	237.6	239.3	228.1	231	209	209.6	204	179.9	180.2	180.1	210.1	214.7	211.2	184.1	182.8	181.5	209.9	215.2	214.3	174.2	174.7	171.6	193.4	213.2	209.5	261.1	252.9	252	255.3	243.9	236.3
36	209.4	210.5	215.5	233.4	230.9	237.5	241.4	229.1	231.2	209.5	209.7	204.3	180.7	179.7	179.6	210.8	212.2	210	185.1	184.3	182	210.1	213.6	214.9	174.2	175.5	171	195.1	214.9	212.2	262.2	253.4	250.5	253.3	245.1	237.5
36.75	209.4	210.6	215.7	233.9	230.3	237.6	240.8	227.9	232.3	209.8	209.4	204.5	178.7	179.7	179.7	210.6	213.8	212	184.3	185.2	182.9	211.6	215.2	214.6	174.7	175.1	172.3	195.3	214.4	212.4	263.1	253.4	252.6	254.8	246.8	237
37.5	210.4	211.5	216.8	233.5	232.1	238.7	240.2	229.3	232.5	210.1	210.1	205	181.2	180.5	181	211.7	215.6	211.2	183.4	183.8	182.5	210.5	215.9	215.3	173.4	175.3	173.2	195.3	215.9	211.1	264.2	253.2	251.1	255.6	246.3	239.3
38.25	210.6	212	214.6	234.1	230.6	239.4	240.2	229.8	232.7	208.6	211.9	206.2	180.2	180.3	179.8	211.8	215.4	212.5	184.4	183.3	182.1	210.2	216.9	215.2	176.4	175.4	172.7	195.6	216.6	213.5	261.7	253.1	252.1	254.3	245.8	237.8
39	212	213.4	217.4	234	231.2	238.7	242	230	232.9	210.8	212.5	206.3	179.7	181.5	180.7	210.8	215.7	211.7	183.3	184	181.9	212.4	215.6	215.4	175.1	175.2	173.2	197.2	215.5	212.7	262.9	253.2	251.2	255.3	246.4	238.5
39.75	211.8	211.8	216.7	234.1	231.3	239.7	240.1	229.2	232.7	212.6	212.5	207.8	179.5	180.4	180.2	212.3	216.7	211.6	183.3	182.4	181.9	212.6	217.5	215.5	175	175.4	172.4	196.3	216	212.2	262.5	253.7	251.7	254.9	246.4	238.9
40.5	211.3	211.8	216.7	233.8	232.6	238.2	241.9	230.8	233.8	212.1	213.7	205.9	179	181.1	178.4	212.7	216.7	213.3	184	183.8	182.4	210.7	216.6	215.6	174.4	174.2	170.9	196.8	215.9	214.2	262.2	252.1	251.9	255.3	247.2	239.8
41.25	212.4	213.4	217.5	235.3	232.8	237.5	241.3	231	233.4	213	214.3	206	179.4	180.8	180.4	214.8	215.7	213.3	184.3	183.4	183.2	213	216.7	215.7	173.5	174.7	172.9	197.8	217.4	214.7	262	253.5	252.1	254.1	248.3	239
42	212	212.9	218	234.3	233.3	238	242.8	230.2	232.8	212.8	212.3	209	180.6	180.4	179.9	212.9	217.4	213.4	184.1	183.6	181	214	217.5	218.2	175.9	175.8	171.8	196.3	217.2	216.7	262.4	255.3	253.3	255.5	247.7	239.1
42.75	211.5	213.1	219.5	234.5	232.3	238.9	242	231.8	233.9	212.5	214.3	208.8	180.7	181.2	178.9	213.5	218.2	212.4	185.4	183.8	183.1	214.1	218.1	218.5	174.9	174.2	172.8	197.2	217.6	214.6	263.7	254	253.9	255.4	247.6	241.4
43.5	212.6	214.1	218.9	235.5	233.2	239.5	243.2	231.2	233.2	215.6	214.7	208.6	180.6	181.3	179.6	213.9	216.5	213.3	184.3	183.3	182.3	212.8	218.4	219.2	174.5	175.3	172.1	197.2	216.8	216.2	261.5	254.9	253.2	255.6	248.7	240.3
44.25	214.2	214.2	219.8	234.6	233.3	238.5	241.5	232.6	233.5	214.5	216.2	209.9	179.5	181.5	180.5	212.8	217.2	214.4	183.7	183	183.3	214.5	218.9	219	175.6	176	173.4	199.3	219.3	216.6	262.4	255.1	252.4	254.4	248.4	240.6
45	213.9	214.9	219.8	234.4	233.5	239.2	241.4	230.2	232.4	215.3	214.8	210.6	179.2	180.6	178.7	214.8	217.6	214.9	184.9	183	181	215	220.1	218.3	174.9	173.7	172.9	198.9	218.2	217.6	262.7	256.5	253.8	254.5	249.3	241.2
45.75	214.9	217.3	220	234.1	233.6	239.8	242.2	232.2	234	217.9	216.2	209.5	181.3	180.6	180.2	214.2	218.2	214	183.2	183.5	181.7	216	217.7	217.9	175.1	175.1	171.5	197.6	220.1	216.7	261.6	255.2	254.2	254.7	247.9	240.9
46.5	214.4	216	220.6	236.2	234.1	238.8	242.3	232.1	233.8	216.5	217.8	210.1	177.8	181.4	179.3	216.3	219.8	215.6	184	183.8	180.1	214.7	218.9	219.6	175.9	173.7	172.3	200.2	219.4	217.6	260.7	255.5	253.6	255.7	249.8	243.1
47.25	215.2	216.6	220.5	235.8	236.3	240.5	241.9	231.8	233.4	215.9	217.1	210.7	180	181.4	180	216.3	219.4	215.8	184	184.2	181.9	216.1	220	219.3	175.4	174.1	171.1	199.6	220.3	219.4	261.2	255.6	251.9	255.7	250.9	241.5
48	215	217.3	221.5	234.3	234.7	240.5	241.5	233	235.3	219.1	219.6	211.3	179.9	180.8	179.1	214.7	219.6	216.1	182.8	182.5	182.8	217.3	222	220.4	175.1	174.8	171.8	200.8	220.4	218.6	262.9	256.5	254.5	256.1	249.6	242
48.75	215.9	216.4	221.3	236.2	234.5	240.5	242.2	232.2	233.8	216.6	218.6	211.1	179.9	180.5	179.8	216.8	219.2	216.5	184	184	182	216.9	219.9	219.3	175.2	174.3	171	200.8	221	220.4	261.7	256.2	254.4	256.3	250.5	243.8
49.5	216.7	217.6	224.1	237.5	233.8	241.1	243.2	232.8	235.7	218.9	220.3	212.3	180	182.2	179.6	215.6	218.5	216.1	184.3	184.5	183.2	216.5	221.8	220.1	173.7	174.1	173.8	200.6	221.9	220.6	260.6	256.4	254	254.4	250.1	242.4
50.25	215.7	218.5	222.3	236.5	235.9	240.4	243.3	233.9	236.2	219.3	220.2	212.3	180.4	180.4	179.2	215.8	220.4	215.4	184.1	183.8	182.8	216.5	220.8	220.1	174.9	174.7	172.2	200.5	221.9	221.6	261.7	256.7	256	254.4	250.2	244.7
51	215.9	218.2	223.1	237.6	235.6	240.6	243.1	233.4	234.1	219.8	220.4	214.4	178.6	179.5	180	216	219.6	216.5	183.8	183.7	182.8	215.7	221.6	221.3	173.4	174.9	170.3	199.4	223.3	220.9	262.1	255.9	254.7	256.2	250.7	244.2
51.75	215.7	218.1	222.9	237.9	235.1	240.2	242	233.4	235.4	219.6	222.2	214.6	181.6	180.1	178.1	217	220.5	215.7	184.7	185.7	180.9	218.5	222	219.9	175	174	171.1	201.3	223.2	221.5	261.1	256.4	255.9	255.1	251.2	243.6
52.5	217.7	218	224.2	236.3	237.5	239.3	242.8	234.4	235.1	219	222.4	214.4	180.6	179.6	180	216.7	221	217.1	184.1	184.6	182.8	218	222.2	221.9	174.8	175.5	173.4	201.8	223	223.2	261.6	257.2	254.2	256.4	250.4	243.3
53.25	216.8	218.1	223.1	236.6	235.7	241	243.1	233.3	235.5	220.6	221.8	214.8	180.4	182.1	177.4	216.8	221.5	217.4	184.3	185.2	181.3	219	221.3	221.4	174	175.3	172.9	201.7	224	223.2	261.3	256.2	255.3	256	250.1	244.5
54	218.8	220.2	225	238	235.8	240.2	243	234.7	235.8	221.8	222.9	215.1	180.8	182	178.7	216.8	221.5	216.3	184.8	183.4	181.2	218.3	222.3	222	176.4	174.6	171.5	203.6	224.5	224	261.9	257	255.8	254.3	251.4	245.6
54.75	218.2	220	224.7	237.2	235.8	241.3	242.6	234.8	235.3	221	223.6	214.8	179.8	180	179.5	216.8	221.3	217.1	183.6	186	183.4	218.9	223.8	221.5	175.3	174.8	173.2	203.2	224.5	224.9	261.9	255.7	255.5	257.2	250.6	245.9

## Sheet: Fig 7E-3
Time (min)	R72C			M57V			Q312L			V260M			L254P			Y53F			R55H			D389Y			C250A			D389G			A371T			WT
	Rep 1	Rep 2	Rep 3	Rep 1	Rep 2	Rep 3	Rep 1	Rep 2	Rep 3	Rep 1	Rep 2	Rep 3	Rep 1	Rep 2	Rep 3	Rep 1	Rep 2	Rep 3	Rep 1	Rep 2	Rep 3	Rep 1	Rep 2	Rep 3	Rep 1	Rep 2	Rep 3	Rep 1	Rep 2	Rep 3	Rep 1	Rep 2	Rep 3	Rep 1	Rep 2	Rep 3
0.75	178.4	176.8	176	176.1	176	172.2	176.2	175.5	173.2	176.4	173.4	175	170.7	171.4	167.5	176.1	177.2	177.3	177.4	179.9	176.2	177.7	177.5	175.3	177.6	178.7	174.9	176.2	174.2	170.3	172.7	171.8	171.2	168.5	165.6	175.6
1.5	176.9	176.8	176.6	178.1	177	173.9	175.1	175.3	172.7	174.3	173.5	173.8	172.1	172.1	167.1	178.2	177.7	175.4	178.6	176.9	176.1	177.7	176.1	175.9	177.9	179.8	173.3	176.4	172.9	169.4	174.2	171.8	172.6	168.3	166.4	174.4
2.25	178.5	175.9	175.4	176.1	177.4	173.1	174.8	175.1	172.9	173.9	173.7	173.5	170.7	169	167.5	177.7	177.3	176.9	178.3	177.2	176	178.4	178.2	174.3	177.5	178.3	175.1	175.8	176.3	169.7	172.3	172.1	171.8	168.9	164.3	175.1
3	179.7	177.3	176.4	177.8	175.7	173.3	175.7	174.6	173.6	175.4	172.9	172.9	172.7	170.3	166.8	178.2	176.5	176.7	179.4	177.2	174.6	177.7	177.1	174.9	177.9	179.7	175.9	176.3	173.6	169.6	172.8	171.9	173.3	168.9	165.6	174
3.75	179.2	175.1	176.4	176.2	174.6	172.9	174.1	175	173.4	176.6	172.9	173.8	171.6	172.2	168.5	178.8	177.4	175.8	179	177.7	176.4	178.1	177.9	176.7	175.8	178.5	175.7	175.3	174.1	170.8	172.2	171.3	173.3	169.6	166.8	173.4
4.5	177.9	176.8	176	176.5	176.6	172.1	173.6	175.4	174	174	173.7	174.7	172.8	171.1	168.3	178.7	177.9	176.4	177.3	177.6	174.8	177	177.3	175.8	177.7	179.3	174.9	176.4	174	169.9	172.7	172.1	173.1	169.8	165.6	174.1
5.25	178.6	175.4	176.7	177.1	175.6	174.3	174.5	174.6	172.5	175.9	173.7	174	172.9	170.4	166.1	178.9	176.5	177.6	176.7	177.8	176	177.1	176.8	174.9	175.7	177.7	175.1	176.4	174.6	170.4	174.5	172.2	173.6	169.9	164.9	174.5
6	177.5	177.5	176.2	175.6	175.2	174.7	175.5	174.2	173.3	173.5	173.3	174.6	171.8	170.8	166.8	178.3	178.5	177.5	177.8	176.6	177.3	177.6	177.3	176.1	178.3	178.1	174	175.4	174.3	169.7	173.5	170.3	173.5	169.8	166	174.9
6.75	177.9	176.2	177.3	176.5	176	172.8	176.5	175.2	172.2	175.6	173.4	173.9	171.4	171.8	168.2	178.5	176.7	175.8	177.8	178.2	176.2	177.5	177.4	177.9	178.2	178.9	174.1	174.1	173.8	169	172.9	172.8	172.5	168.9	165.5	175.9
7.5	177.3	175.9	175.8	177.2	175.9	173.3	174.9	176.2	172.9	175.2	173.6	175.1	171.9	171.6	166.8	178	177.4	176.2	177.4	176.5	176.6	178.5	176.2	173.9	177.2	178.2	176.1	175.6	174	169.3	174	170.7	172.9	169.8	165.9	174.7
8.25	178.2	176.7	175	177.3	177.1	172.4	176.5	173.2	173.5	176.2	173.7	173.2	171.3	171.9	167.1	177.3	177.3	176	176.9	176.5	176.2	177.2	176	176.4	176.6	179.1	173.3	174.6	174.6	168.8	172	173	173.1	168	167.1	174.2
9	179.1	176.2	176	176.2	176.7	173.7	175.9	175.2	172.5	174.7	175	174	172.5	171.3	166.2	178	176.5	176.9	178.5	178.4	175.9	176.8	178.2	174.8	175.6	178.4	175.1	176	173.5	168.4	170.9	171.6	173.6	169.2	166.3	174.1
9.75	179.2	176.3	176.6	176.5	175.9	172.7	175.7	173.3	173.2	174.9	173.8	174	172.6	171.5	167.8	178.6	177.3	175.4	177.1	176.7	176.1	176.7	176.7	175.7	177.8	178.4	174.7	175.6	174.8	169.4	173.4	170.8	173.3	169.8	166.5	175.5
10.5	177.3	176.3	174.6	176.5	177.2	172.9	175	175.2	173	175.6	172.7	173	172.1	170.2	165.3	178	177	178	178.3	178.1	175.6	179.5	177.3	175.9	176.4	177.7	173.6	176.2	174.2	170.3	171.5	172.1	171.4	168.4	166.2	175.6
11.25	190.9	188	185.4	204.8	199.3	194.9	198.1	197.3	190.6	176.7	175	173.1	170.9	172.8	166.4	189.2	189.5	185.8	178.5	178.4	174.4	197.4	192.2	189.8	176.9	178.7	173.8	182.3	181	177	197.3	194.9	199.1	192.6	186.8	200
12	192.7	190.1	189.5	210.1	203.4	202.4	203.5	201.9	197.1	179.2	175.9	175	171.2	171.9	168.2	191.9	193.7	190.9	178.7	178.1	175.1	198	195.6	194.8	176.6	179.3	175	185.2	182.9	180.1	202.7	198.2	207.3	193.1	190.7	206
12.75	198.1	193.4	190.7	214.8	206.8	205.4	209	205.3	201	180.1	177.1	175.7	171.3	171	166.1	193.1	197.4	194.6	179.2	177.3	173.9	201	200.9	198.2	176	179.7	173.2	185.4	184.1	181.2	203.3	200.8	210.7	196.7	192.1	209.6
13.5	200.1	195.1	195.6	218.2	209.5	208.5	210.2	207.1	204.3	179.5	180.5	179.1	170.6	170.8	166	194.5	200.3	199.3	180	176.9	176.3	204	200.8	202	176.4	179.5	174.9	186	188.3	184	207.1	205.4	214.1	197.9	195.9	213.2
14.25	202.2	197.1	196.5	221.9	210.6	212.9	212.8	211.5	207.8	180.9	181	178.9	170.8	172.6	166.5	197.8	204.7	203	177.8	179.5	175.7	206	204.6	203.5	176.6	180.4	173	187.7	188	185.6	210	207.5	217.1	199	198.7	218.5
15	206.7	198.3	200.4	220.6	214.1	214.5	216.2	211.4	211.5	181.4	181.7	180.8	170.3	171.6	168.6	198.6	206.6	206.6	179.3	178.6	175.5	208.9	205.8	207.3	175.9	180.8	174.1	188.8	191	188.3	211.8	208.4	219.9	200.2	200.4	221.5
15.75	207.7	201.8	201.7	224.1	215.5	217.1	217.4	214.2	213.3	184.7	183.9	183.6	173.2	171.6	166.2	198.7	208.8	210	179.6	178.2	174.6	210	207	206.9	177.4	179.3	174.4	191.6	192.4	188.4	213.2	210.9	222.4	203.1	201.4	223.7
16.5	210	203.7	205.5	224.1	218.5	219.3	219.1	215.1	215.3	184	184.7	183.4	170.4	171	166.8	200.5	210	210.6	180.5	177.3	177.2	212.1	210	211.5	176.7	180.3	173	192.6	192.7	190	214.4	212.5	224	202.9	201.7	224
17.25	210.4	204.6	204.2	227.7	217.1	220.1	220.1	216.8	216.4	185.4	185.3	184.2	173	171.2	165.7	201.9	212	212.3	181	178.3	178.9	215.2	210.2	212.5	176.2	178.1	174.1	192.2	192.9	192.2	214.3	212.4	224.2	204.2	203.1	226.2
18	213.8	205	206.5	227.6	219.8	221.5	221	218.6	217.8	185.8	187.1	186	171.8	171.5	165.6	201.5	213	214.3	179.9	178.4	176.6	217	212.7	215.1	175.5	178.9	172.7	194.4	194.4	193.2	215.7	215.3	225.8	206.2	204.3	227.6
18.75	214.4	207.2	210.3	227.5	222	222.4	223.1	217.8	219.5	186.4	188.3	187.8	171.8	170.8	166.8	202.9	215	215.7	180.6	178.2	176.6	217.8	213.3	214.6	175.7	178.7	173.3	193	195.2	193	218.4	215.4	224.3	206.1	207.1	229.7
19.5	217.6	207.9	210.5	230.2	222.9	222.1	224.7	219.6	220.1	187.1	189.2	189.4	170.9	172.2	166	204.5	216.2	216.7	180.5	179	178.3	218.4	214.6	214.3	176.6	179.8	174.5	195.1	197.3	194.6	219.5	217.4	226.1	208.7	206.8	230.5
20.25	215.4	210	212.3	231.2	223.8	224.3	224.8	220.8	219.8	187.6	189.6	190.3	170.4	171.3	167.7	203.8	218.3	218.1	179.8	178.8	178.5	219.2	215.5	217.3	176.2	178.6	173.6	196.8	197.5	194.5	219.7	217.9	226.6	207.7	206.4	232
21	219.6	209.8	214.9	228.5	221.3	224.1	225	220.7	221	190.3	190.1	192	171.4	170.3	165	204.8	218	219.8	181.2	179.3	177.6	220.7	216.1	219.6	175.2	178.8	174.4	195.2	198.1	196.3	221.9	219.9	228	209.2	209.6	233
21.75	219.2	212.9	215.2	230.5	223.4	225.5	226	222	222	189	191.3	194.1	170.9	171.3	166.6	207.8	219.9	219.7	180.4	180.3	178.5	222.2	218.6	218.9	175.8	177.8	174.5	195.8	198.5	197.9	221.4	220.8	227.4	210.9	209.7	230.8
22.5	221.7	212.5	215.5	230.6	222.9	226	226.5	222.5	220.6	190.2	190.8	196.4	170.8	169.8	166.9	208.3	222.2	221.2	181.6	179.2	177.2	223.8	220.7	219.3	175.4	178.6	175.3	198.6	199.7	198.9	221.8	219.6	229.1	210	210.6	233.4
23.25	221.9	213.9	217.7	233.6	224.7	226.6	228	222.7	221	192.1	192.3	198.2	173.2	170.5	165.5	208.6	221.7	223.4	181.6	179.5	178.7	223.8	220.8	221.2	175.7	177.2	174.2	198.7	200.6	201.1	223.8	220.7	227.6	211.2	211	234.1
24	222.5	212.7	218.4	230.7	225.1	224.9	228.6	224.1	223.5	190.9	194.5	197.8	170.6	169.5	167.6	208.5	223.6	223	182.2	179.2	180.1	222.9	220.6	221.8	176.6	177.5	173.1	198.5	200	200.4	223.9	222.3	230.3	212.3	210.5	233
24.75	223.5	216	218.9	232.7	226.2	224.7	227.8	224.2	223.5	193.6	194	200	172.5	170.3	165.2	208.9	222.6	224.4	181.6	180.8	178.6	224.2	221.3	222.3	175.3	178	174.9	199.7	202.4	201.3	224.4	222.9	227.9	212.9	211.9	233.8
25.5	226.2	217.6	221	231.3	225.1	226.1	229.7	223.6	224.8	194	195.5	199.3	171.8	172.5	167.9	210.1	224.5	225.6	181.4	181.4	178.1	225	220.9	222.4	174.8	179	174.3	199.3	201.5	201.2	225.8	222.8	229.7	213.5	211.7	233.8
26.25	227	217.3	220.1	232	226.7	226.6	228.3	226.3	224.2	191.3	197.4	200.3	173.4	172.5	166.1	209.6	224.7	227.4	181.5	180.3	180.2	225.5	223.5	224.3	176.1	178.9	174.2	199.5	204.3	202.3	224.9	222.6	229.6	215.2	211.1	234.1
27	227.2	217.9	220.5	232.5	227.7	227.3	231.4	227.9	224.3	194.9	197.1	201.8	171.9	171.4	168.6	210.4	226.1	228.3	180.7	181.1	178.6	225.7	223.5	225.6	176.2	179.9	174.4	200.2	203.6	204.2	225.9	222.3	230.1	215.4	214.9	237
27.75	227.6	220.3	222.5	232.9	226.1	226.4	229.1	227.3	224.4	195.6	199.2	204.4	172.8	171	168.1	212.2	226.1	228.3	181.5	181.2	179.3	226.2	224.1	224.1	175.5	177.5	175.8	202.2	204.3	204.2	225.1	225.7	230.8	214.9	212.3	233.3
28.5	227.9	219.7	222.9	230.9	227.3	226.6	230.6	227	224.5	195.7	198.1	204.8	171.8	170.2	165.8	210.9	226.8	228.9	182.8	181	180.3	227.4	224.5	224.6	176.6	177.7	175.1	200.8	205.2	205	227.5	225.8	230.5	217	214.7	235.5
29.25	230.3	221.1	221.9	232.2	227.6	227	230.4	227	225.7	197.3	199	204.6	172.1	170.4	167.9	210.8	226.9	229.1	183.3	181.9	181.9	227.8	225.1	224.9	174.6	178.7	174	204.3	205.4	204.9	227.6	225.3	231.1	214.9	214.7	234.1
30	228.9	221.1	224.2	233	229.6	227.9	229.8	227.5	226.9	195.6	200.5	207.4	172.4	171.6	167.9	214	227.9	230.7	181.3	182.4	180.7	228.9	224	225.4	175.3	177.9	176.2	202.3	207.8	205.3	228.1	225.8	231.5	215.3	215.6	235.4
30.75	229.4	222	224.5	232.8	229.2	227.6	232.2	227.1	226.3	198.3	201.1	208	172.4	171	167.1	213.8	229.1	229.4	181.9	183.4	178.5	228.7	226.3	225.3	176.5	179.4	173.3	202.5	207.9	207.2	228.5	225.4	231.3	216.7	216.7	235.4
31.5	230.5	222.1	223.6	233.4	229.9	228	230.4	228.5	228	199.5	199.7	209.5	172.3	171	167.7	212.9	229.3	229.1	182.6	182.1	180.4	229.6	226.7	227	175.9	177.8	174.5	204.4	207.7	205.9	228.5	226.3	232	217	213.8	235.5
32.25	231.4	223	224.9	233.1	228.9	228.7	230.9	229	225.1	200.7	201.4	209.6	172.5	170.9	168.9	213.9	229.8	230.7	183.1	183.3	180.7	230.1	227.9	227.5	175.8	178.9	173.4	204.2	209.4	207.3	229.3	227.5	230.5	218	216.6	234.9
33	230.5	223	226.2	233.7	229.9	228.2	231.1	229.1	227	201.3	201.9	210.3	173.7	170.8	167.4	214.6	231.1	231.1	183.3	183.1	181.4	230.6	227.5	228.3	176.3	180.5	173.6	204.4	209.6	206.8	231.3	226.5	230.6	218.3	216.3	236.1
33.75	231	224.9	225.8	234.7	230.3	228.3	230.9	227.7	226.4	200.3	202.4	212	172.1	172.5	168.2	215.3	231.2	229.6	182.1	184.2	180.8	230.3	228	228.4	175.5	178.8	174.6	205.6	210.8	207.1	229.6	226.4	232.3	218.5	215.7	235.7
34.5	229.9	224.6	226.7	234.4	229.1	228.7	231.5	228.6	225.3	202	205	212.7	172	171.2	166.8	215.8	230.7	229.9	180.7	184.1	182.1	231.6	228.5	228.7	175.4	178.2	175.3	206.1	211.1	208	230.7	226.9	232.3	218	216.7	236.3
35.25	230.7	225.6	228.3	235.4	229.6	227.3	230.7	228.5	226.8	201.4	204.6	213.5	171.8	170.6	166.8	215.5	230.5	229.6	182.8	181.7	182.6	232	229.2	229.8	174.2	178.7	174	206.5	211.5	209.6	230.3	227.7	231.7	218.8	218.2	235.9
36	230.7	224.5	227.3	234.8	229.5	229	232.1	228.3	228	202.7	204.1	214.7	171.5	171.5	168.9	216.9	231.1	228.6	182.3	182.9	182.6	231.7	228.4	227.3	175.8	179.4	174.1	208.1	212.5	209.3	232.8	228.9	230.2	219.8	216.9	236.8
36.75	230.9	226.2	228.6	233.6	230.7	228.6	231	228.8	226.2	203.6	205.6	214.8	172.2	171	167.5	218	232.2	229.5	184.3	183	182.5	230.5	230.7	229	175.5	179	173.7	207.6	211	209.7	230.2	227.7	232.4	221.6	217.4	237.2
37.5	231	225.2	228.9	234.9	228	228.8	229.5	228.9	226.7	204.2	205.5	216.2	171.2	172.2	166.1	217.4	232.1	230.9	185.8	182.6	183.3	234	229.5	229.8	174.3	178.8	174.4	207.3	214	209.7	231.2	227.3	229.9	219.7	216.3	234.8
38.25	230.7	226.3	227.9	234.2	229.6	228.6	230.1	229.6	228.4	204.9	206.2	218.9	172.7	170.3	168.5	217.6	231.1	230.3	183.3	182.6	183	232.8	231	229.7	175.6	178.5	174	206.5	213	210.1	231.1	229.5	230.7	220.8	216.9	234.2
39	231.6	227.4	229	235.4	229.1	228.1	231.3	228.9	227.4	204.8	206.5	217.6	171.8	171.6	167.4	218.9	233.2	229.6	184.2	182.7	181.7	234.2	230.1	229.9	176	178.5	173.7	209.4	215.8	212.1	231.3	228.2	229.9	219.4	218.2	234.5
39.75	231.7	227.6	230.5	233.4	229.4	230.3	232.2	229.7	226	205	208.3	219.2	174.9	172.4	167.9	218.4	234.1	228.9	182	183.1	182	234.1	230.8	228.6	176.1	178.4	174.9	207.1	216.1	212.2	231.5	228.1	231	221.2	217.5	237.1
40.5	231	227.7	230.2	233.9	229.9	228.6	231.3	230.3	228	205.7	209.7	219.3	173.4	170.4	168	219.3	233.4	230.1	184.1	184.6	183.2	233.7	231.7	229.5	174.4	177.1	175.4	207.3	216.5	214.3	231.1	227.5	229.8	221.5	216.3	237.1
41.25	231.8	227	229.6	233.9	229.9	228.7	232	230.2	228.3	206.8	209.5	218.6	173.4	172.1	167.3	220.2	231.5	229.2	185.2	183.5	182.8	234.6	232.7	229.2	175	177.7	176	210.1	217.9	213.1	231.1	228.8	230.9	219.5	220.3	234.7
42	231.8	227.7	229.9	233	230.2	230.1	232.4	229.9	229	207.4	211.2	217.8	173.5	171.6	167.4	220.2	231.2	229.2	183.5	181.2	183.9	234.7	232.1	230.2	177.4	178.7	174	210.7	218.1	214.7	231.4	229.3	231.5	221.9	218.9	236.6
42.75	232.9	227.3	230.2	232.4	230.6	228.4	232.5	232	227.7	207.5	208.6	218.6	172.7	171.6	167.6	219.6	232	229	184.9	183.6	184.4	234.8	232	229.2	174.3	179.2	175.5	210.2	217.9	213.2	233.1	230.1	231.4	221.5	218.2	236.1
43.5	231.4	228	228.8	233.7	230.2	228.5	233	230.4	228	208.6	209.5	218.1	172.1	172.4	166.9	220.9	230.7	229.1	184.2	183	182.5	235.4	232.7	230.4	176.5	177.9	175.3	211.4	217.8	215.1	231.8	230.9	231.8	222.2	219.5	235.9
44.25	231.9	227.8	229.6	233.4	229.8	229.1	233.1	231.9	226.6	209.1	212.2	220.2	172.5	173	167.3	221.4	230.5	230.8	186.4	184.6	182.2	236.3	232.2	231.4	175.2	177.9	174.3	210.3	221.3	216.3	232.1	230.3	231.6	220.7	218.4	235.3
45	231.8	229.1	229.3	234	229.5	227.7	232.9	231.6	228	210.4	212	220.5	173.2	171.3	167.1	221.6	232.1	227.7	184.5	182.7	182.9	236.1	232.3	229.8	175.7	178.2	174	213.3	220.1	216.1	231.8	230.6	231.4	221.5	220.1	236.3
45.75	233.6	227	230.5	232.4	229.8	228.9	233.5	231.5	228	209.7	213.9	218.4	173.3	171.1	167.6	222.5	231.8	229.9	185.5	182.7	182.4	234.5	232.1	229.3	175	179.3	174.5	213.4	220.2	216	233	227.4	230	221	219.2	235.8
46.5	233.4	229.3	228	232.9	230.1	230	233.4	231.6	227.3	211.9	214	218.2	173.3	171.4	168.6	220.7	231.9	227.7	185.3	182.4	182.9	235.5	232.9	232.2	176.1	179.8	172.7	213.1	221.3	216.6	232.1	230.4	231.7	220.3	219.8	237
47.25	230.9	229	228.3	233.1	231.8	227.3	231.8	230.6	227.1	213.4	214.2	218.5	174.3	172.2	169.5	222.1	230.8	227.1	186.8	182.7	181.8	235.9	232.8	232.9	175.8	178.5	174.1	214.6	219.8	217.4	232.1	228.9	231.4	222	219	237
48	232.7	227.3	228.6	232.4	231	229	232.1	230.4	229.3	212.9	217.2	219.2	172.4	171.7	169.4	222.9	230.8	228.9	186	184	183	235.6	233.7	232	175	177.4	175	214.5	221.6	218.2	233.7	230.6	230.6	222.5	219.5	235.8
48.75	233	227.6	228.2	232.8	229.5	227.5	231.6	230	227.9	211.6	215.1	217.9	173.8	171.7	166.3	223.3	230	228.3	184	183.9	183.4	236.6	233.7	232.1	174.8	179.1	172.7	215.6	220.2	216.5	232.4	230.6	230.3	221	221.5	236.2
49.5	232	228	228.1	233.5	230.2	227.6	232.9	230.9	228.6	214.3	214.8	219.3	172.9	171.5	168	222.2	230.7	227.9	185.4	183.7	182.4	237	234.7	232.9	176.7	176.9	176.1	216.5	222.2	217	232.1	231.4	231.5	221	218.9	236.4
50.25	231.9	228.9	230	234.7	230.2	228.4	231.9	229.1	228.4	214.7	215.3	219.3	173.9	171.8	167.9	223.7	228.7	228.1	187.2	182.4	183.1	237.7	234.1	233.4	174.6	178.6	174.5	215.4	220.7	219.1	232.5	229.6	233.3	222.9	220.9	235.7
51	233.1	229.2	230.5	232.1	230.8	226.9	234.3	231.1	227.7	213.6	215.6	220.7	173.8	171.6	166.8	224.3	230.2	228.5	185.4	183.8	181.7	236	236.2	231.7	175.4	179.3	173.8	216.8	220.2	219.5	233.1	231.3	231.7	222.1	221	236.2
51.75	233.5	228.8	229.3	233.1	229.9	227.8	234.2	229.1	226.8	214.3	218.6	220.6	171.8	170.7	168.9	223	231.1	227.9	185	183.8	184.1	237.6	234.3	231.9	176.4	177.9	174.5	217.3	220.5	216.8	233.4	229.4	230.6	222.1	218.9	237.4
52.5	230.7	228.9	229.1	233.5	230.4	228.5	232	230.7	227	214.4	218.2	218.1	173.3	173.7	169.7	223.6	229.6	227	186.9	183.4	182.6	237.8	234.7	231.8	174.5	178.1	174.2	217.2	219.8	219.1	232.5	229.5	232.2	221.7	219.8	235.4
53.25	232.7	227.8	229.7	233.3	228.8	226.5	231.9	231.7	227.3	216.4	219.4	219.5	173.3	173.8	168.1	225.3	229.7	227.1	185.3	184.3	184.3	236.1	234.9	232.9	176.3	179.1	174.5	218.8	220.4	217.9	232.2	230.9	230.3	224.1	220.4	236.2
54	233.7	228.9	228.5	233.8	230.9	228.6	232.7	233.1	228.1	215.4	218.1	220.2	173.3	173.3	167.7	224.7	228.8	226.9	186.2	184.9	183	238	235.8	232.8	175.6	177.1	174.4	218.2	219.7	219.6	232.6	231.5	231.8	225	220.9	235.5
54.75	234	228.6	228.4	232.8	229.7	227.9	232.6	231.1	229.1	218.3	220.2	220.2	173.5	172.4	169.3	226.3	229.1	226.1	186	183	182.3	237	235.2	230.9	175.5	178	174.5	216.9	220	217.8	232.8	231	230.7	222.2	219	236.1

## Sheet: Fig 7F-1
Time (min)	R72C			M57V			Q312L			V260M			L254P			Y53F			R55H			D389Y			C250A			A371T			D389G			WT
	Rep 1	Rep 2	Rep 3	Rep 1	Rep 2	Rep 3	Rep 1	Rep 2	Rep 3	Rep 1	Rep 2	Rep 3	Rep 1	Rep 2	Rep 3	Rep 1	Rep 2	Rep 3	Rep 1	Rep 2	Rep 3	Rep 1	Rep 2	Rep 3	Rep 1	Rep 2	Rep 3	Rep 1	Rep 2	Rep 3	Rep 1	Rep 2	Rep 3	Rep 1	Rep 2	Rep 3
0.75	183	184	181.9	180.5	182.2	182.1	179	179.7	179.1	176.6	178.5	181.3	174.7	176.7	176	171.7	174.1	176	180.9	179.8	179	178.3	178.9	178.6	178.2	177.7	178.2	177	178.6	176.3	175.1	176.5	175.1	173.1	173.9	173.1
1.5	182.5	185.1	181.8	180.2	182.3	180.4	178.2	179.7	178.7	176.4	179.8	181.6	175.1	178	176.3	171.3	175.1	174.6	178.9	179.8	178.2	179	179	178.8	177.8	177.6	178	176	177.9	178.1	174	175.9	175.9	171.4	173.5	172.5
2.25	183.3	184.8	183.6	180.4	180.5	181.3	178.7	180.3	180.1	176.1	179.4	181.6	175.6	177	176	171.6	174.7	175.6	178.4	179.3	179.6	177.7	179.9	178.2	178.6	179.1	178.1	177.4	178.6	177.1	174.7	176.4	175.2	172.3	175	173.6
3	183.9	183.7	182.3	180.5	181.7	181.2	177.4	181	178.6	176.5	179.5	180.8	174.9	177.9	177.5	173.6	173.4	174.2	178.4	178.7	180.4	179	179.8	178.6	177.8	178.9	178.9	176.4	178.6	176	174.7	175.4	175.1	171.6	173.9	173.2
3.75	182.1	182.1	181.9	179.7	179.8	181.4	178.7	180.2	180.8	175.8	179.8	180.3	174.8	177.5	175.8	170.6	174.6	172.4	179.7	180.2	180.1	177.1	180.1	177.7	177.5	178.2	179.1	176.7	177.7	178	174.3	176.4	176.2	172.7	174.2	172
4.5	182.9	182.5	182.1	181.1	182.4	179.8	178.5	181.4	180.5	175.7	178.7	181.4	174.3	179	175.3	172	175.3	174.6	178.4	181.4	178.8	177.7	177.8	177.2	177.8	178.7	178.4	175.3	178.5	177.1	176.3	176.3	175.4	171.9	173.5	173.4
5.25	183	183.7	182.7	178.7	180.6	180.6	178.8	181.4	178.9	177.1	179.3	180.6	174.8	178.7	177.3	171.2	175.3	173.3	179	179	177.7	176.8	178.2	179.4	176.6	177.6	178.4	176.1	177.1	177.7	173.8	175.7	175.5	170.8	173.7	173
6	182.2	184	182.1	180.1	181.4	180.7	177.2	179.8	178.5	175.2	178.5	180.1	175.7	176.9	175.7	172.3	175.7	174.4	178.8	179.8	178.7	178.2	179.2	178.8	178.7	177.9	177.6	177.3	177.6	177.4	175.5	176	174.6	172	174.6	174
6.75	181	183.4	182.6	179.5	180.2	181.7	178.1	180.1	179.9	176.5	179.6	180.8	174.4	176.3	175	172.3	174.4	174.5	178.3	179.2	178.3	177.3	179.4	178.6	177.3	177.3	179.1	175.6	177.4	177.6	175	175.3	176.5	172.9	173.4	173.4
7.5	182.2	184.5	182.8	180.8	181.8	182.2	177.5	181.4	179.7	177.4	179.7	181.2	173.9	176.9	175.6	172.3	174.9	174.8	179.7	179.5	178.6	179	179	178.7	177.6	178.2	178.2	176.6	179.1	178.5	174.6	176	174.9	171.6	173.9	173.4
8.25	182	184.3	183.3	180.3	181.8	182.3	176.9	179.3	179	175.7	179.3	180	175.6	176.9	175.9	171.5	175.6	173.9	179.9	178.3	178.6	178	179.9	178.3	177.2	178.4	177.1	175.7	177.2	176.6	175	176.2	176.5	173.6	173.5	172.6
9	181.5	182.7	182.4	178.6	181.9	180.9	178.9	180.5	178.1	176.5	178	181.1	174.9	176.8	176.6	172.6	174.4	173.8	180	178.1	178.3	179.4	179.7	178.3	178.4	178	176.8	175.1	177.5	176	175.2	174.5	176.2	172.5	173.8	173.3
9.75	181.5	182.5	182.4	179.1	182	181.9	176.1	181.3	178.6	175.4	178.7	179.2	175.9	176.3	175.6	171.3	174.9	174.7	178.3	177.7	178.6	177	178.7	178.6	177.4	177.9	177.2	175.1	176.8	176.8	175.6	176.3	175.7	174.3	173.9	171.9
10.5	182.4	183.4	181	178.6	181.7	182.5	177.4	179.7	178.5	176.3	177.4	180.6	174.8	175.6	176.7	170.4	174.7	174.3	178.5	177.5	178.6	178.9	179.5	178.4	177.3	178.5	178.1	176.1	178.5	178.3	175.7	175.5	174.2	172.2	174	172.7
11.25	192.2	197.6	199.3	193.8	201.1	207.1	189.4	195.9	202.6	187.3	192	194	183.1	185.4	186.2	187.5	199.3	208.5	186.7	188.4	188.1	196.1	200.5	206.9	186.8	188.9	187.6	207.4	221.8	223	186	188.1	193.5	201.2	216.2	215
12	193.7	199.2	200.8	198.8	207	212.1	194.2	200.4	206	190	193.3	195.8	183.1	184.8	184.1	193	205.3	211	186.4	187.2	188	200.3	206.9	211	187.1	189.2	188.1	217.1	230.7	226.9	189.1	189.8	194.8	208.1	222.6	216.6
12.75	196.3	202	205.6	203.8	211.2	214.1	197.9	205	207.6	190.9	196.6	197.6	179.8	183.6	184.4	196.4	209.9	215.1	185.6	186.6	186.3	203.3	209.8	214.8	187	188.7	186.3	223.4	235.1	228.5	189.3	192.4	196.3	213.1	226.6	219.1
13.5	198.3	204.9	207.8	209.7	214.7	215.5	199.5	207.5	209.5	193.2	197.9	198.4	180.6	183.7	182.3	198.5	212.8	218.9	185.4	186.7	185.8	206.3	213.4	217.6	185.3	190.3	184.6	227.9	240.6	231.8	191.1	192.7	197.4	217.6	230.9	220.9
14.25	200.2	206.5	210.1	211.4	216.6	219.5	202.9	212.3	211.3	194.3	200.7	201.1	180.8	182.5	183.6	200.3	215.3	221.2	183.6	186.4	184.4	208.6	219.7	219.1	184.4	189.6	182.7	230.9	244.2	233.5	191.1	195.5	198.3	220.4	233.2	222.4
15	200.9	207.2	213.1	216.1	220.5	221.8	205.1	212.2	213.4	196.5	201.2	202.3	179.9	182.7	182.9	201.7	217	222.5	184.9	185	184.5	210.6	221.4	221.9	184.5	189	184.8	232.9	245.3	235.3	192.9	197.5	200.2	223.3	233.9	223.6
15.75	202.9	209	215.5	218.1	220.8	222.6	208.4	216.4	214.9	197.5	204	205	179.9	180.9	181.8	203.2	220.4	225.3	182.6	184.4	185.3	213	223.3	222.7	182.6	188	183.3	236	246.8	235.7	193.3	198.5	201.2	224.8	235.5	225.4
16.5	204.7	209.9	216.1	220	223.7	224.4	209.9	216.7	215.5	199.2	205.9	206.3	179	180.7	181.6	205.4	221.9	226.2	183.9	183.8	183.3	215.2	226.9	226	182.3	187.5	181	239	245.3	237.4	194.7	200.9	200.7	226.9	236.8	227.1
17.25	206.7	212.4	217.2	222.5	224.9	224.3	209.9	219.6	217.9	201.2	207.8	208.1	177.4	181.2	180.7	206.8	222	227.3	183.9	183.7	184.6	217	228.4	227.6	182.4	189.5	181.6	240.8	248	239	196.8	202.4	202.7	228.4	236.9	225.6
18	208.2	213.1	218.2	222.8	226.4	225.9	212.1	221.9	217.8	203.3	210.6	209	177.5	180.9	180.9	206.4	224.5	227.5	182.9	184	182.8	218.9	229.8	229.8	180.8	186.3	181.4	240.8	248	240	199.7	203.4	203.1	228.9	237.8	228.5
18.75	209.8	214.5	223	225.4	226.8	227.3	213.1	223	219.4	204.2	213	209.3	178.9	179	181.1	207.8	224.2	229	182	184.4	181.5	220.8	231.8	229.4	182.4	185.8	179.1	242.6	249.5	240.9	200	204.5	203.5	230.5	239.6	228.9
19.5	210.3	216.3	223.2	226.8	228.1	227.4	214.9	224.9	219.5	205	215.1	210.7	178.7	181	179.8	208.1	225.7	228.4	182.5	184	183.6	222.8	232.7	231.7	180.3	186.1	180.1	241.8	250.7	240.2	200.6	206	204.2	231.2	239	226.7
20.25	211	216.7	224.1	226.8	228.5	227.4	215.6	226.6	221.1	208.5	217.1	212.5	178.5	180.8	180.5	211.2	226.4	228.6	183.5	183.5	181.1	223.9	233.9	232.3	179.9	185.4	180.7	242.5	249.4	241.6	202.7	208.4	205.8	232.5	237.7	230.5
21	211.4	217	225.5	226.4	231.3	229.1	216	226.1	221	210	219.3	214.7	177.7	180.5	180	211.1	227.4	229.3	180.8	183.4	181.9	225.2	235.9	232.2	179.7	184.2	180.3	244.4	249.9	242.9	204	207.4	207.5	232.8	239.6	231.1
21.75	213.4	217.5	225.8	228.5	229.3	228.8	218.8	228.7	221.9	211.1	218.5	213.4	177.7	179.8	180.5	212.1	228.2	229.7	182.6	183.1	181.3	225.4	237.3	234	178.5	183.7	180.2	243.5	248.3	243	205.4	208	207.2	235.1	239.3	230.6
22.5	214.5	220.6	227.3	229	230.3	229.9	218.2	229	221.7	213.3	222.3	217	178.4	179.7	178.6	212.8	229.1	231.1	180.8	183.1	182.1	227.3	238.3	234.6	178.9	185.5	179.1	244.5	247.4	242.1	206.9	210.4	206.9	234.3	240	232.1
23.25	216.4	220.3	228.6	229.4	231.6	231.1	219.3	231.6	224.1	214.7	222.8	217.3	177.4	179	179.1	213.6	228.6	229.4	182	182.6	182.7	229.9	237.7	234.8	178.7	183.5	179.5	243.3	248.6	242.7	208.1	211.3	209.5	235.1	239.8	234.5
24	216	220.9	229.9	228.4	233.4	230	220.5	231.2	224.3	216.8	225.7	217.5	178	180.6	180.8	216.1	229.1	229.2	181.3	183.3	181.7	228.1	238.3	235.4	179.8	184.9	179.1	243.4	248.1	242.7	209.9	211.9	208.7	234	240.7	233.4
24.75	217.4	221.1	230.7	230.2	231.6	231.5	221.3	231.3	223.6	219.4	227.1	220.1	178.3	179.7	179.2	215.4	229.4	230.1	181.7	184	182	229.6	239.1	235.6	180.1	183.5	179.8	243.7	249.4	243.7	210.2	212.5	211	235.6	238.8	232.9
25.5	218.1	221.8	231	231.5	232.9	231.3	220.1	234.2	224.8	221.7	229.7	219.9	177.4	179	180.8	215.5	230.9	230.9	180.6	184	181.7	231.5	241.3	236.5	179.2	181.9	179.9	245.2	248.8	245.2	210.4	213.3	210.2	236.2	240.3	233.7
26.25	218.9	223.1	232.7	231	234.5	231.7	223.3	232.4	225.7	222.2	229.7	221.1	178.5	180.4	179	217.6	229.5	230.1	181.8	183.4	182.2	232.2	240.3	237.1	179.2	183.6	180.1	244.9	247.6	244.2	212.5	215	213.2	233.3	239.9	234.5
27	220	224.3	231.2	232.9	234.1	232.4	222.5	234.2	226.3	224.9	231.9	221.2	177.3	178.9	178.7	217.8	230.1	228.3	181.5	183.1	181.6	232.9	241.1	235.6	179.3	182.3	178.7	245.4	248.6	243.8	214.4	216	214	235.3	241.6	234.9
27.75	221.6	223.6	230.7	232.1	235.1	232.2	224.2	235	226.4	227.9	232.4	222.9	178.1	180.3	178	219.1	229.3	231.8	180.6	183.6	180.7	233.4	240.5	236.6	179.1	182.5	179.1	244.6	249.2	244.7	215.5	216	214.4	235.9	240.9	235.5
28.5	222.1	225.3	232.1	234.6	234.4	232.7	226.3	235.9	227.6	230.4	235.2	224.5	177.4	180.3	179.6	220.1	230.5	229.3	181	183.2	182	233.5	239	238	179.2	182.5	178.8	244.1	248.9	244.8	214.1	215.6	215	234.1	241.2	235.8
29.25	222.5	226.4	231.3	233.2	234	232	226.6	235.5	228.4	229.6	233.1	225.8	176.4	180.5	180.2	220.3	230.1	229.9	182.1	182.8	181.2	234.4	239.8	238.2	177.9	181.3	178.8	244.4	248.5	244.3	214.8	218.3	217.1	235.9	240.1	237.3
30	223.9	227.1	231.5	232.8	235.5	232.7	226.6	235	229	227.7	234.1	226.9	178.4	179.9	178.5	220	230.1	229.1	182.3	183.2	182.6	236	241.5	237.8	178.5	180.5	179	244.2	249.3	245.2	215.9	218.5	218.8	235.9	239	237
30.75	224.4	227.5	233.3	235	234.7	233.9	225.9	236	230.1	228.7	235.5	229.1	177.9	180	181.3	219.4	229.7	229.3	180	181.7	182.6	235.7	240.1	237.3	177.4	180.3	179.4	244.8	248.5	244.8	215.6	219.5	218.4	234.9	240	238.4
31.5	225.2	227.6	234.1	235.3	236.3	234.8	227	235.9	229.4	229.4	234.6	230.5	177	180.1	180.2	221.1	230	228.9	181.5	184	182.9	237	239.9	237.7	178.7	181.1	179	245.4	248.2	246	214.5	219.1	218.9	236.5	240.8	236.5
32.25	226.8	228.5	234.3	233.4	235.9	233.8	230	236.3	230.5	228.3	235.2	231.5	178	179.9	179.6	220.5	229.2	228.3	182.1	184.2	182.6	236.9	240.2	237.6	178.6	181	179.5	245.4	248.7	245.2	217.1	220.4	218.4	237.3	241.4	237.9
33	228.6	229.9	233.6	234	235.8	234.6	228.1	234.6	231.2	231.3	233.9	232.6	176.3	180.6	179.8	220.2	229.8	229.1	181.1	184.9	180.3	235.9	240.6	237.2	177.8	180.9	178	245.1	248.6	245.7	216.3	219.1	220.6	238.1	241.3	236.5
33.75	227.9	229.6	232.7	233.5	235.9	235.9	229.7	235.7	233.9	232.1	235.3	233.5	177.6	179.2	179.4	220	228.9	228.6	181.8	183.4	182.6	236.5	240	238.1	176.7	181.7	178	245.6	247.7	244.9	215.3	220.8	218.9	236	240.9	237.9
34.5	228.5	232	233.7	233.8	234.4	236.1	228	236	232.9	232.5	236.8	232.7	177.8	179.5	179.2	221.2	228.9	229.1	182.5	182.7	183.8	236.1	239.6	238.7	177.1	179.7	178.8	243.3	249.2	246.9	218	221	220.1	236.7	241	237.7
35.25	228.9	231.6	233.6	232.9	235.8	235.3	229.1	236.8	234.2	233.1	236.6	231.5	177.9	180.2	179.9	219.7	229.2	229.1	181.5	182.7	183.1	236.7	239.7	237	178.1	180.1	178.2	245	246.7	244.8	217.5	221.9	218.9	236.2	240	238.6
36	228.6	232.2	234	233.5	235.4	236.4	230.7	235.3	234.1	234	236.9	232.3	177.6	180.3	180.4	220.2	228.7	228.5	180.8	183	182.4	237.2	239.8	237.5	178.4	181.2	178.4	246.2	247.4	246	219.3	220.5	220.5	235.9	241.9	237.4
36.75	230.4	233.6	233.4	233.7	236.7	235.9	229.9	237.8	234.9	233.5	237.9	233.7	176.1	180.1	181.1	219.5	228.4	228.9	181.8	183.4	182.9	236.6	240.5	237.4	178.8	180.5	178.3	244.1	248.3	245.5	220.1	222.5	221.6	237.6	239.9	238.5
37.5	230.3	232.8	233.4	233.3	235.4	234.8	229.1	235	233.7	233.6	237.8	233.9	178.2	180	180.5	219.6	229.9	227.2	181.2	182.1	181.4	236.6	239.5	236.8	179	179.7	177.7	244.7	248.2	244.7	219.9	223.2	220.6	235.9	240.6	238.5
38.25	231.5	232.8	232.6	231.6	235.5	236.5	230	235.6	232.8	235.5	237.5	233.9	177.3	181.2	178.5	218.8	228.9	227.8	180.2	182.4	181.7	238.1	240.6	237.8	177.9	180.6	179.6	245.5	246.2	245.6	219.1	224	220.7	237.1	240.5	237.4
39	229.3	234.1	233.3	234.5	236.3	235.4	230.8	236.3	233.5	236.3	238.1	234.4	176.4	180	180.1	220.5	228.6	228.4	181.6	183	181.5	236.9	240.1	238.4	178.3	179.8	179.5	244.4	245.9	244.9	220.4	222	223	234.7	240.7	237.7
39.75	229.5	233.8	232.9	233.1	235.5	235.2	231.6	236.2	233.1	235.9	238.7	235.3	177.4	179.4	181	217.9	228	227.1	181	182.9	181.4	236.3	239.7	238	178.9	180.2	178.5	243.9	245.1	245	221	223.7	220.3	236.7	241.5	238.4
40.5	232.1	233.4	232.8	231.9	236.7	235.6	231	237.3	234.4	234.9	238.4	233.8	178.2	179.3	179.9	217.9	228.1	226.7	181.2	182.6	181.8	236	240.6	237.3	179.3	180.8	179	245.3	246.4	244.5	220	222.5	222.5	236	241.1	237.1
41.25	231	232.9	233.9	231.9	236.8	235.7	231.6	236.3	233.1	235.1	238	234.4	178.5	180.2	179	219.8	228.7	227.6	181.9	182.1	182.6	235.7	239.2	235.9	177.5	180.8	177.5	245.2	246.4	244.1	220.6	223.5	222.2	235.3	241.4	237.3
42	231.6	234.7	232.6	231.4	236.4	233.8	229.7	237.3	234.1	236.7	238.8	235.2	178	178.3	179.2	218.8	226.7	227.1	180.9	183.6	182.5	235.2	236.7	235.5	178.5	179.2	178.7	245.6	245.1	244.6	221.7	223.4	222.7	235.2	242.8	237.8

## Sheet: Fig 7F-2
Time (min)	R72C			M57V			Q312L			V260M			L254P			Y53F			R55H			D389Y			C250A			D389G			A371T			WT
	Rep 1	Rep 2	Rep 3	Rep 1	Rep 2	Rep 3	Rep 1	Rep 2	Rep 3	Rep 1	Rep 2	Rep 3	Rep 1	Rep 2	Rep 3	Rep 1	Rep 2	Rep 3	Rep 1	Rep 2	Rep 3	Rep 1	Rep 2	Rep 3	Rep 1	Rep 2	Rep 3	Rep 1	Rep 2	Rep 3	Rep 1	Rep 2	Rep 3	Rep 1	Rep 2	Rep 3
0.75	190.3	190.2	187	189.4	189.2	187.8	188.3	186.8	185.6	188.1	184.9	181.3	189.6	187.3	185.3	188.4	187.8	183.5	185.9	185.7	184.4	186	184.6	183.4	185.7	181.8	179.8	180.5	185.7	183.1	185.8	184	183.8	183.3	181.6	181.7
1.5	190.7	191.2	189.7	189.7	190.2	186.8	188.3	186.5	186.1	186.7	185.5	180	187.8	186.8	186.1	189.1	187.5	185.6	185.6	185.7	184.4	185.9	185.6	184.2	184.4	182	180.3	182.7	184.9	184	185.6	185.7	182.1	182.1	182.7	178.5
2.25	189.6	189.5	188.1	189.8	191.7	187.2	186.7	185	185.5	186.3	185.1	180	187.2	186.2	184.8	187.3	187.1	185.8	187.6	184.1	183.5	186.1	183.6	181.9	185.4	181.7	179.4	183.1	184.6	182.9	184.3	186.6	182.2	182.4	181	181.1
3	191.1	190.1	188.3	188.9	188.9	186.2	188.9	186.9	185.8	186.8	185.6	179.4	188.1	188.2	185.1	186.9	186.9	186.2	186.4	184.6	183.4	185.3	184.4	183	183.2	184	180.4	180.3	186.3	183.9	184.1	184.9	183.4	181.8	182.6	181.3
3.75	190.1	191.1	188.6	190.9	190.4	187.8	187.5	188.4	185.3	185.4	184.2	180.9	188.3	186.5	185.7	188	186.6	183.8	186.5	183.8	184.8	185.9	185.1	182	183.7	183.5	180.6	181.4	185.8	182.9	184.3	184.9	182.8	183.4	183.7	181.6
4.5	191	190.5	188.8	190.3	189.6	187.3	186.9	186.9	184.5	187	185.4	179.3	186.8	186.1	184.1	188.3	185.7	185.5	185.1	183.9	183.2	186.1	186.1	182.3	183.1	182.3	179.6	181.7	185.9	184.8	184.3	184.2	181.6	182.4	181.7	180.6
5.25	189.3	190.7	187.7	189.6	190	187.3	187.1	185.5	185.6	186.5	184.6	181.1	188.7	185.2	185.4	187.8	185.5	184.6	185.6	185	184.9	185.1	184.5	183.2	183.7	180.2	178.5	180.1	185.4	184.4	184.1	183.2	182.7	182.3	183	181.2
6	191.2	190.3	188.6	190.4	187.9	184.7	187.3	186.1	184.9	186.6	184.5	180.3	187.2	187.1	185.6	188	186.5	186	186.6	184.7	183.4	184.3	185	182	183.2	181.8	180.5	181.2	184.3	183.8	185.2	185.2	181.6	183.3	181.8	180.5
6.75	191.3	192	188.2	190	187.1	188.6	189	186.7	185.3	186.6	183.5	178.6	188.5	188.2	183.9	187.4	185.4	183.4	184	184.6	183.5	185.8	184.5	182.5	182.3	180.8	180.9	178.9	184.7	184.8	183.4	184.1	181.1	181.8	182.3	180.7
7.5	191.1	190.6	189	190.5	189.4	186.7	188.2	186.1	185.4	186.6	185.1	179.4	186.9	187.2	184.7	189.8	187.4	183.4	185.4	184.4	183.1	185.2	184.4	182.3	183.3	182	180.1	181.6	185.6	182.3	184	183.8	183.1	181	181.7	180.3
8.25	190.3	191.5	187.5	187.6	188.5	187.5	186.9	186.9	186.1	187.3	184.6	180.5	187.6	186.8	185.6	187.7	186.6	183.2	185.2	184.8	184.1	186.2	184.7	182.9	182.8	182.9	180.4	180.3	184.5	183.3	183.8	185.5	180.9	182.5	181.8	179.5
9	190	190.7	186.7	190.4	190.9	186.8	188.2	187.1	184	187.5	185.9	179	187.3	186.4	186.1	188.8	187.4	184.7	185.2	186.3	183.5	186	182.9	182.8	183.9	181.1	180.1	180.8	185.2	183.1	184	184.4	183.3	181	182.7	181.5
9.75	191.2	189.3	188.8	189.8	188.3	186.4	186.6	186.8	183.8	185.6	183.2	179.3	186.2	186.5	185.7	188.5	185.7	184.2	186.4	184.6	183.2	183.8	184.4	182.1	182.9	182.4	181.5	180.3	186	183.8	184	184.3	181.3	181.7	182.1	180.8
10.5	189.6	191.4	187.9	190	188.3	186.6	188	186.6	185.8	186.3	185	180.6	187.4	186.9	184.3	188.6	187.1	184	185.2	184.6	182	185.2	183.6	184.1	183.1	182.7	179.5	181.3	185.5	183	185.1	184.4	183	182	181.9	181.5
11.25	208.3	205.3	198.1	218.8	212.1	203.8	208	200.2	194	198.1	190.1	185.5	196.3	192.7	191.1	210.6	202.8	196	195.7	190.6	190	213.1	202.8	197.6	192	187.8	185.1	193.2	193.1	191.3	229.4	219.7	217.2	220.6	208.8	207.2
12	210.3	208	201.3	224.2	217.1	208.6	209.9	203.9	195.6	199.8	192.2	185.7	195.2	191.6	190.1	211.6	205.6	198.7	195.2	191	188.7	215.1	207.4	202.9	193.1	187.2	184.8	194.2	196.6	192	232.2	223.2	226.1	223.3	212.4	214.5
12.75	214.5	209.9	202.7	227.7	219.9	215.2	212.5	205.1	198.7	200.3	193.6	184.7	193.4	190.7	189.2	214.1	208.3	202.2	194.4	188.8	187.9	218.9	210.5	207.4	190.1	185.7	184.6	192.7	195.3	193.8	234.6	226.6	232.2	225	215.1	219.9
13.5	216.5	214.3	204.8	230.3	224.5	220.1	214.9	208.8	201.8	201.7	193.5	186.9	194.5	190	189.9	216.4	211.3	204.5	194.6	188.9	187	222.7	213.3	211.2	189.4	184.4	184.7	194.2	197.1	195.4	238.1	230.2	235.5	227.1	218.5	223.4
14.25	220.3	216.6	205.8	232.5	227	224.1	216.2	209.1	205.8	202.8	197.1	187.6	193	188.6	188	218.6	215	210	194.8	187.9	186.2	226.8	217	214.2	188.4	183.9	182.5	195.3	197.2	196.3	239.8	231.4	238.3	229.1	220.3	227.4
15	221.1	218.3	208.7	234.8	228.1	226.9	218.3	212.6	206.1	203.3	196.4	189.5	192.5	188.6	187.4	219.7	215.1	209.5	193.6	189.6	184.2	228.9	218.4	218.6	189.2	184.7	182.4	197.4	199.4	198.1	240.7	234.4	240.6	230.4	223.1	230.2
15.75	221.4	219	213	235	229.7	228.6	219.4	211.3	208.9	205.1	198.9	191.3	191.4	188.9	186.9	220.7	217.5	214.1	192.4	189	185.5	229.2	219.3	220.2	188.2	183.7	181.2	197.9	200.6	199.5	241.3	235.5	240.9	232.5	224.4	232.1
16.5	225	220.3	214.3	236.3	231.6	230.6	219.7	214.1	209.6	205.3	199.4	192.9	190.1	188	186.2	222.1	218.9	214.4	192.4	186.7	186.1	230.3	221.6	222.2	189	183.5	182.5	199.9	200.2	201.5	242.2	238.7	240.9	232.4	224.4	232
17.25	226.2	223.4	214.1	236.3	233.7	231.5	219.4	216.1	211.4	208.4	200.3	193.8	189.9	188.2	186.1	223.9	222.2	215.8	191.9	187.8	184.5	231.2	222.8	225.1	184.6	184.2	180.7	201.5	202.1	202.3	245.1	238.8	242.1	233.3	226.4	231.4
18	227.1	222.6	216	238.9	232.2	233.4	221.4	217.4	214.2	209.6	203.1	194.9	191	186.2	183.9	225.1	222.2	218.4	191	187	185	233.6	225.8	225.1	185.3	181.8	180.3	201.3	200.7	204.7	243	238.9	242.4	233.9	227.1	233.2
18.75	229.3	224.9	217.2	239.3	234.1	234.4	222	217.2	215.3	210.7	205.3	195	189.6	187.2	184	224.9	222.3	218.5	189.9	186.3	182.5	233.9	226.2	226.1	187.3	180.9	180.1	202.1	203	205.6	244.1	240.7	243.4	234.5	227.2	233.8
19.5	230.1	226.7	218.9	239.6	235.2	235	223.3	217.3	216.7	211	204.9	197.9	190.6	185.8	184.6	225.7	224.3	220.6	191.8	186.8	181.3	237.4	225.4	227.2	184.3	180.2	179.5	202.6	203.9	205.2	244.4	240.7	241.8	234.4	228.4	232.7
20.25	231.5	225.5	219.9	239.1	235.5	235.1	222.9	220.2	218.5	211.3	207	201	188.5	185.4	185.1	227.1	224.8	219.6	190.3	186.1	181.9	236	227.7	231	184.6	181.3	177.9	203.6	204.9	207.1	244.4	241.5	243.1	236.1	230.7	235.9
21	232.6	229	221.1	240.3	235.5	237	224.3	220.6	218.8	212.8	207.5	201.1	189.5	184	183.1	228	227	220.7	191.1	187	183.4	237.8	228.8	230.5	182.1	180.7	179.3	204.3	205.8	209.3	247.4	240.5	243.1	237.7	230	234.9
21.75	234.1	228.8	222.3	240.7	235.2	236.6	223	222.1	219.4	213.8	209.4	201.3	188.4	183.8	183.9	229.5	226.7	222.6	190.9	185.3	182.1	238.5	228.4	231.9	185.1	179.8	181.3	205.5	206.9	209.4	245.9	241.6	243.3	237.2	231.3	236.2
22.5	233.2	230.1	225.2	240.9	235.6	237.5	224.5	222	221.3	215.3	210.5	203.1	189.2	184.8	184	229.9	227.9	224.9	190.6	184.9	183.9	237.7	230.8	232.3	182.9	180.4	179.8	206.8	206.9	210.8	246.5	241.3	242.3	238.3	229.8	234
23.25	235	231.9	225.9	241.5	236.1	238.7	226.5	224.3	221.2	216.2	213.2	204.8	188	184	183.6	231.6	227.7	223.8	191	184	183.2	238.8	230.3	231.5	183.9	182.6	181.5	206.5	208	211.1	246.7	240.7	242.6	238	231.8	235.4
24	234.1	231.1	226.8	240.9	237.3	238.1	226.2	224.1	222.4	216.1	212.3	205.2	187.1	186.3	183.4	231.3	227.6	225.1	190.6	186.4	183.2	239.9	230.9	233.1	182.9	181.7	181.4	206.2	207.8	212.9	246.3	240.7	243.3	237.8	233.2	235.2
24.75	233.6	233.8	227.3	241.8	237.5	238.9	227.6	224.7	225.4	219	214.3	206.8	187.8	184.6	183.4	230.9	229.5	227.8	190.8	186.8	183.1	238.9	230.4	233.6	183.8	181	180.1	209.3	208.2	211.7	246.2	242.4	242.9	237.8	231.9	237.2
25.5	238.4	232.6	226.9	243.3	236.3	238.8	227.7	225	225.1	219.4	214.9	209	186.8	184	182.5	231.1	230	225.3	191.5	187.8	183.6	238.9	232.9	233.1	182.3	180.9	178.8	208.8	208.9	213.3	247.5	242	240.9	239.4	233.3	235.6
26.25	237.4	233.4	228.9	242.3	235.5	237.8	228.6	225.3	225.2	219.3	216.5	208.4	188.4	183.2	182.6	231.6	230.2	228.8	191.2	186.5	183.2	239.8	231.8	234.2	182	179.8	180.6	209.3	210.6	215.4	247.8	241.6	242.9	239.5	232.3	236.2
27	238.9	233.5	230.1	242.6	236.8	238.6	228.4	226.3	226.9	219.1	216.6	211.9	186.7	183.5	183.5	233.1	229.9	227.2	191.9	186.5	184.5	238.9	231.9	233	182.5	180.9	179.2	210	209.7	215.8	247.9	241.2	243.2	238	232.1	234.8
27.75	240.5	233.8	229.5	240.9	235.8	238.9	229.9	225.8	226.5	220.4	218	212.6	187.7	186.2	182.5	231.9	232.1	228.8	190.6	188.6	183.2	240.4	231.6	232.9	182.3	180.3	178.7	211.6	210.3	216.5	247.8	240.9	243.1	239.2	232.2	234.9
28.5	238.2	234.1	232.6	242.4	237.7	238.6	228.1	226.3	225.9	222.3	219.5	212.8	187.2	185.6	182	231.3	231.8	227.9	190.1	186.8	183.5	240.5	233.3	233.9	182.1	181.1	178.4	212.5	211.3	217.3	247.1	241.2	241.9	240.4	233	235.2
29.25	238.2	234.4	232.9	242.6	235.4	236.4	229.3	225.4	228.8	223	219.5	210.9	186.8	185.4	183.5	232.3	232.3	229.2	191.3	188.3	182.8	240.5	233.4	231.8	183.1	179.4	179.4	211.8	211.9	218	248.2	241.1	243.5	239.3	232.7	235.5
30	240	234.4	233.3	241.6	236	238.4	231.5	226.2	227.9	222.2	221.8	215.6	186.3	184.4	182.9	232.4	232.4	228.2	191.3	187	181.9	240.2	233.2	234.5	182.1	180.4	179	214	211.7	219	248.1	240.9	240.4	239	234.3	237.5
30.75	240.4	236.6	232.7	242.7	235.3	237.8	231.3	227.6	227.9	224.4	220.5	215	187	185.7	183.8	232.6	230	229.3	190.2	185.3	183.2	239.4	234.1	232.6	182.8	181.3	178.1	212.8	213.9	219.9	245.7	242.3	242	239.7	234.5	237.8
31.5	241.1	235.8	235.9	243.9	235.7	236.9	230.8	227.9	228.2	225.6	221.9	215.8	187.1	183.8	183.9	234	233.8	227.9	192.2	188	183.1	239.6	234	232.5	181.2	179	179.3	214.5	213.2	218.7	247.3	242.1	241.6	239.7	234.3	236.7
32.25	242.5	236.9	233.4	241.1	237.1	236.3	230.5	227.9	228.7	225	222.3	216.3	186.4	184.9	184.6	235.1	231.4	229.2	190.7	185.9	185.1	240.9	232.4	234.1	183.3	180.9	178.5	214.8	215.2	220	247.5	241.7	240.3	238.6	233	236.9
33	239.6	235.7	234	242.4	235.8	236.6	231.3	228.9	227.8	225.3	222.3	216.4	187.1	184.5	183.6	233.9	232.2	231	190.8	186.5	183.5	240.3	232.6	232.9	181	181.3	179.7	215.2	216.2	221	247.7	243	241.4	240.3	233.7	236.2
33.75	240.5	237	234.6	243	235.2	237.1	232.7	228	228.9	226.4	221.8	216.4	185	184.1	184.3	233.8	232.4	229.1	192.7	187.5	183.6	240.8	233.1	234	181.3	179.4	179.7	216	215.2	220.3	247.2	243	241.5	239.2	234	235.6
34.5	240.6	236.6	234.5	242.3	236.9	237.9	231.9	228.6	227.7	226.7	225.3	216.9	186.2	184.7	183.7	234.1	231.6	230.7	191.7	186.4	181.5	238.9	232.8	234.2	181.3	181.1	178.4	214	213.8	219.4	248.6	241.7	241.5	240.1	233.9	236
35.25	241.2	237.9	233.5	241.4	235.5	237.2	231.8	229.6	226.5	229.3	225.9	218.5	186.6	184.7	184.5	233.5	231.9	228.7	191.4	185.9	183.1	239.9	233.2	235	181.7	179.9	179.2	215.6	216.9	221.9	248	242	241.7	240.5	234.3	236.7
36	242.6	237.7	235.1	241.3	235.3	237.8	231.2	228.2	228.2	228.8	223.9	219.1	186.3	185	182.7	235.7	230.2	230.6	192.5	187.4	185.2	239.4	234.2	233.8	183.4	179.8	179.7	214.9	215.8	220.6	246.1	243.1	240.8	237.9	236.2	234.6
36.75	242.4	237.1	235.8	242.1	234.8	237	233	229.2	229.2	228.6	225.5	218.9	186.6	184.3	184.8	234.2	231.1	228.4	190.4	186.8	184.6	240.3	232.5	234	181.5	180.6	179.8	216.3	215.7	222.2	248	242.6	242.4	239.6	234.3	236.4
37.5	242.5	236.6	236	242.6	235.7	236.7	231.1	228	229.4	229	226.3	219.1	186.3	185.2	182.5	233.6	230.8	227.9	190.8	187.4	185.1	241.9	233.7	235.1	181.1	181.5	177.3	218.6	216.7	221.2	248.3	242.1	241.6	240.9	234	234.2
38.25	242.5	236.9	234.5	242.1	234.9	236.3	231.1	228.7	228.6	229.3	228.7	219.1	187.2	184.5	183.4	233.9	231.3	229.1	192.1	187.7	184.7	238.2	232.9	232.7	181.7	179.4	178.8	218.4	216.5	223	249	241.4	242	239.1	234	236.2
39	243.6	237.5	236.1	242.3	234.3	234.8	233.2	230.2	228.8	231.5	227.7	220	187.2	185.3	183.4	235.5	232	228.4	191.6	187.7	183.8	239.6	232.5	232.9	183	179.2	177.1	216.2	216.9	222.1	245.1	240.8	240.2	240.8	235	235.7
39.75	242.3	237.5	235.1	242	234.6	236.2	230.9	228.9	229.6	230.7	230.1	221.3	186.6	184.2	182.4	236	230.4	228	192	185.2	184.2	241.6	233.4	231.2	180.3	180.2	178.9	216.9	217.9	223.4	245	242.4	240.9	240	234.5	236.1
40.5	243.2	237.7	235.4	242	236.4	235.2	234	229	229.5	231.4	229.2	221	185.9	183.6	183.1	235.4	230.7	228	191	189.6	184.2	240	231.7	234	182.1	178.6	179.2	218.3	218.3	223	247	242.1	241.6	240.7	234.3	235.6
41.25	241.2	238.8	234.1	240.8	234.6	235.2	233.5	229.6	227	231	229.4	222.5	187.2	183.9	182.3	235.6	231.2	227.3	191.5	187.6	183.3	238.8	233.9	233.1	182.3	180.7	179.8	219.1	218.3	221.7	247.1	242.2	241.7	241.5	234.1	236.5
42	242.5	238.1	234.9	242.2	235.7	234.9	233.4	229.2	229.3	232.7	230.9	219.8	185.8	184.1	183.6	235.7	230.6	226.3	190.6	186.5	184.1	240.8	232.6	232.7	180.9	178.2	178.9	220	217.4	223.6	245.9	239.9	241	240.4	235	234.7
42.75	242.9	238.2	235.6	241.6	234.3	236.8	234.2	229.2	230.3	231.8	228.6	221.1	187.7	184.7	182.9	235.1	232	229.3	192.2	188.8	184.8	240.4	235.5	231.7	180	179.9	178.1	218.3	218	225.3	247.3	240.3	239.7	242	234.6	235.7
43.5	242.7	239.6	236	241.1	235.9	235.3	234.1	228.9	229.5	233.3	230.3	222.5	186.3	184.1	183	235.6	230.7	229	191.5	186.3	184.1	240	232.7	233.1	180.8	179.4	179.1	218.9	220.4	223.5	247.5	239.5	241.6	241.8	235.8	235.5
44.25	242.6	237.8	235.6	242.5	235.4	236.1	233.7	229.6	230	231.1	229	221.7	186.1	183.9	182.6	234.7	230.7	226.3	192	188.1	183.2	240.5	233.3	231.9	183.2	179.9	178.9	218.5	219.9	224.5	246.6	241.7	239.3	240.9	234.5	235.6
45	242.2	236.4	236.8	241.7	236	235.2	234.3	229.2	228.2	233.2	229.6	222.8	184.4	183.2	184	235.5	230.1	229.3	193.6	188.2	182.6	239	232.4	232.5	181.8	178.9	177.6	219.7	219.6	223.8	249	240.3	241.1	241.3	235.5	234.7
45.75	243.4	236.9	235.1	241.1	235.6	235.1	233.8	230.5	230.5	233.7	229.4	222.6	186.6	183	182.8	233.7	229.9	226.5	192	186.9	183.8	240.1	233.9	232.4	181.1	180.9	178.1	218.2	219.4	223.3	247.7	240.5	240.3	241.5	234.8	236.1
46.5	240.5	238	235.2	241.3	233.7	236.4	233.9	229.6	229.4	233.7	229.1	222.9	187.1	184.8	183.6	234.9	230.8	227.8	191.7	187.8	183.7	240.1	233.6	232.7	181.9	180	179.3	219.9	218.8	224.4	246.5	240.4	239.3	241.9	236.7	235.3
47.25	241.4	237.2	235.2	243.4	236	235.4	234	230.3	227.9	234.5	230.3	223.5	185.3	183.2	182.6	235	229.9	230.2	191.9	187.4	183.9	240.3	231.8	231.9	179.5	177.9	177.6	218.7	221	224.8	247.7	239.1	240.9	239.8	233.3	234.6
48	243.1	238.3	236.1	242.3	234.6	235.8	235.1	230.7	229.8	235.6	229.2	223.1	186.6	185.4	184.6	235.8	229.9	229.1	191.2	187.1	183.2	238.7	232.9	231.8	181.5	178.2	177.7	219.7	221.7	224.7	247	241	240.3	240.6	234.7	235.9
48.75	241.9	236.4	234.4	241.1	233.9	235.2	234.2	230.3	229.1	234.9	229.9	224.3	186.2	183.7	183.6	235.3	230.1	227.9	193.1	187.8	183.2	239.7	233.1	231.9	181.2	178.4	179.9	220.6	221.5	225.1	246	240.1	239	240.6	234.5	235.2
49.5	242.1	238.1	235.3	240	234.9	236.4	235.4	231.3	229.1	234.5	229.3	222.9	184.9	185.9	183.3	235.6	229.8	228.5	192	188.5	182.7	240.7	233.4	231.7	182.7	178.7	179.7	218	222.3	226.6	247.1	239.5	240.5	240.9	235	234.1
50.25	241.1	236.7	234.7	241.3	235.2	233.6	233.8	230.5	227.8	237.3	228.3	224.8	189.1	184.6	183.2	236.3	230.5	229.1	192.1	187.4	182.7	240.3	233.8	232.5	181.8	179.6	179.1	219.4	221.2	224.2	247.2	239.1	238.9	239.7	235.5	234.1
51	243.3	237.1	235.3	240.9	234.7	234	234.7	230.6	227.5	237.1	229.9	224.6	186.6	183.7	183.2	234	229.6	227.6	191.9	187.8	182.5	240.2	233.7	231.2	180.4	179.1	178.1	218	221.5	225.8	246.3	239.8	239.4	240.7	236.6	235.2
51.75	241.8	236.9	235.8	241.3	234.7	233.5	235.6	228.7	228	237.5	229.4	224.6	187.8	183.8	182.5	235.1	228	227	192.1	188.4	183.9	239.6	234.4	231.8	180.8	179.4	178.2	218.2	221.7	224.8	248.5	241.1	240.8	240.7	234.4	234.3
52.5	243.5	237.4	234.2	241.1	234.7	234.8	233.7	230.6	228.4	237.8	229.2	224.8	186.3	183.8	184.1	234.5	228.9	227.3	193	188.6	183.9	239.4	232.6	231.9	181.5	180.8	179.4	219.6	222.4	225.3	247.2	239.4	240.8	241.6	236.6	235.6
53.25	241.9	237.1	235.1	240.9	235.3	233.9	236.2	230.9	229.5	238.7	229.4	222.9	186.9	183.9	184.7	234.1	230.1	227.2	192.3	186.6	182.7	239.9	233.5	232.9	179.7	180.1	177.3	220.5	221.3	225.6	246.4	239.6	238.3	239.9	233.3	233
54	242.5	235.6	235	240.4	235.1	233.8	236.1	230.7	227.8	237.5	230.1	224.5	186.3	184.4	182.9	235.5	229.3	227.2	191.4	187.3	182.3	240.5	235.2	231	181.3	179.5	178.4	221.3	224.3	224.3	246.7	239.8	238.8	239.2	234.7	234.2
54.75	241.4	237.6	234.9	240.7	233.4	234.9	235.6	228.7	226.9	237.3	230.4	223.7	186.4	184.7	182.4	235.6	228.2	226	192.2	188.4	185.2	239	232.1	231.8	182.7	178.3	179.1	219.6	224.2	225.9	246.5	240.4	238.9	241.7	234.7	235.5

## Sheet: Fig 7F-3
Time (min)	R72C			M57V			Q312L			V260M			L254P			Y53F			R55H			D389Y			C250A			D389G			A371T			WT
	Rep 1	Rep 2	Rep 3	Rep 1	Rep 2	Rep 3	Rep 1	Rep 2	Rep 3	Rep 1	Rep 2	Rep 3	Rep 1	Rep 2	Rep 3	Rep 1	Rep 2	Rep 3	Rep 1	Rep 2	Rep 3	Rep 1	Rep 2	Rep 3	Rep 1	Rep 2	Rep 3	Rep 1	Rep 2	Rep 3	Rep 1	Rep 2	Rep 3	Rep 1	Rep 2	Rep 3
0.75	193	191.4	190.9	192.5	190.3	189.8	189.6	190.7	189.4	192.1	190.1	192	190.1	189.5	189.3	191.8	191	189.7	187.8	189.8	189.4	189.5	190.2	189.2	188.5	191.5	188.7	189	190.6	189.2	189.3	188.2	187.6	187	186.7	187.6
1.5	194.5	192.1	190.6	191.3	191.2	191.1	191	189.6	192.9	192.6	189.2	190.4	190.4	189.8	189	189.6	190.4	190.1	190.6	189.3	187.8	189.2	190.8	189.7	188.4	189.4	191.1	187.5	188.1	187.4	186.2	188.2	187.7	188.6	187.5	186.3
2.25	192.2	191.7	190.9	191.5	191	190.5	190.7	191	191.3	193	189.6	189.3	190.1	190.4	189.3	190	189.6	189	191.3	189.2	188.2	187.9	187.9	189.7	187.6	190.5	189.4	189.2	188.2	189.7	187.2	189.5	187.5	185.9	190.8	187.4
3	191.1	190.2	191	191.7	193.2	190.9	189.9	190.9	191.5	190.7	192.4	189.7	190.3	190.1	190.3	189	190.7	187.7	189	189.8	190	189.7	188.3	188.1	189.3	187.4	190.1	186.5	188.7	189.2	188	187.1	189.6	187.2	187.8	188
3.75	191.3	192.8	189.3	192.2	191.5	190.1	192.1	190.1	191.4	192.2	191.9	190.1	190.3	188.4	189.1	190.9	192.5	190.1	189.4	188.8	188.8	188.2	188.8	189.4	188	189.1	190.8	188.5	190.4	188.6	188.2	188.8	188.7	187.6	188.6	187.8
4.5	192.6	193	192.9	192.5	192.3	190.6	190.4	191.2	189.7	192	189.9	191.5	189.3	188.3	189.8	191.4	190.9	188.4	190.1	191.1	188.8	190.1	190.1	188.9	189.6	189.3	188.6	188.1	187.9	188.3	188.2	188.8	187.4	186.5	187.3	187
5.25	191.7	192.8	190.7	193.4	192.3	191.4	191.3	189.7	189.5	190.8	191.1	192.1	191.4	190.8	189.1	190.5	189.4	189.4	187.4	189.3	188	188.4	189.6	188.8	188.6	189.4	191.5	189.9	187.2	187.1	186.2	189.7	187.4	190.4	187.6	186.5
6	193	190.7	190.8	193.9	192.1	189.8	191.1	189.5	191.7	192.4	189.6	189.7	190.6	191.2	190.2	189.8	192.6	190.3	188.9	189.9	188.8	188.3	191.6	189.6	189.4	187.7	190.6	188.3	190.1	188	188.8	188	185.8	188.6	188	186.7
6.75	191.9	190.9	192.7	192.6	190.7	189.6	190.9	189	190.5	190.2	191.5	191.9	190.4	190.4	190.5	190.5	191.1	188.5	189.5	188.9	188	188.7	190.2	188.9	188.7	188.2	188	189.4	190	187.9	185.8	188.6	187.7	188.6	189.6	186.9
7.5	193.1	193.9	191.8	190.9	191.8	189.9	189.5	190.1	190.1	192	190.9	190.2	189.3	188.5	190.7	193.1	191.7	189.5	188.3	189.1	190	189.5	190.9	187.6	190.5	190.6	188.9	189.2	190.5	189.1	189.7	189	187.9	187.9	187.7	188.6
8.25	193.5	191.9	192.2	192	190.7	191.5	189.1	191.6	190.6	192.5	191.1	190.7	190.7	189.6	191.2	191.5	189.6	189.9	189.4	190.6	189.8	187.5	188.6	188.5	188.5	189.1	188.5	189.1	188.3	188	188.2	189.3	186.6	188.3	189.9	186.7
9	193.5	192.4	189.4	192	189.8	191.6	190.5	189.5	192	191.5	192	188.9	189.2	191.4	191	189.1	190.4	188.8	190	189.8	190.5	188.1	188.1	189.5	189.5	191.5	189.5	189.9	188.4	188.5	188	187.4	190.2	190	187.5	188.3
9.75	193.7	192	191.8	193.9	192.5	189.5	190.5	190.3	189.2	193.3	191.1	191.1	191.8	191	190.7	192.7	190.1	189.6	190.1	189.8	187.9	187.6	189.4	188.3	188.3	190.4	189.8	188.2	190.3	190	188.2	190.6	190.1	187.5	187.4	187.7
10.5	192.7	192.5	191.3	191.5	192.9	191.3	190.2	190.9	191.9	191	191.5	190.2	190.1	189.1	190.3	189.4	191.6	190.3	189.6	189.5	189	188.4	190.3	189.1	189.6	189.3	188.6	190.8	191.9	188.1	189.4	188.6	188.2	187.6	188.3	186.6
11.25	211.3	207	205.3	214.7	212.8	210.3	214.5	212	207.9	209.4	205.7	205.8	197.4	197.4	195	209.6	208.9	205.8	195.5	196.5	193	208.2	208.1	206.1	195.3	196.3	194.9	202.5	201.6	201.1	213.1	209.8	210.6	213	210.6	205.8
12	213.4	208.1	208.4	216.2	214.6	212.6	217.9	213.9	215.1	209.9	206.7	210	192.9	195.2	193.6	211.1	209	208.9	193.1	193.7	191.5	211.5	210.8	210.5	193.9	194.4	193.6	202.6	205.1	203.5	212.7	213.2	209.3	213.4	213.1	209.1
12.75	215.9	211.4	213.5	216.6	215.8	215.5	218.9	214.8	216.3	211.4	210.3	210.7	195.7	195.7	194.3	212.9	210.2	211.7	191.4	195.5	191.2	211.6	213.2	213.9	195.9	194.1	192.5	203.3	205.4	207.6	213.6	216	213.7	214.6	216.6	211.3
13.5	216.9	213.8	214.1	217.2	219.6	217.8	219.3	217	216.7	213.3	211.2	214.5	193.1	196.4	191.9	213.3	212.9	211.5	193	193.6	190.9	214.6	213.4	213.2	195.1	195.1	191.2	203.5	206.1	206.1	213.9	218.2	214.9	214.8	215.9	213.5
14.25	218.3	214.5	214.1	221.3	218	215.5	220.8	217.4	217.9	215.2	209.7	214.7	193.6	192.6	192.4	214.3	213.9	210.5	191.9	191.8	191.1	212.8	214	211.8	192.3	193.1	193	207.6	206.9	206	215.3	218.4	213.4	215.4	214.9	212.5
15	220.3	215.3	214.9	219.5	219.5	215.3	221	218.7	217.3	217.2	212.8	216.1	194.5	192.7	190.9	214.6	213	212.3	191.8	193.7	189.8	216.4	216	211.7	191.6	191.3	190.5	207.2	209.8	208.3	217.5	219.4	214.6	216.7	214.3	212
15.75	220	216.7	214.9	218.1	219.9	216.5	218.8	216.6	218.6	216	214.2	215.3	193.8	194.4	192.3	215	212.4	212.7	192.3	192.4	190.3	213.7	215.9	212.5	193	192.7	190.9	207.5	209.4	206.7	215.9	216.8	213.8	214.8	214	212.6
16.5	221.1	217.1	216.5	221.3	217.9	217.3	219.9	217.8	218.2	218.6	215.7	215.8	193.6	194.3	191.1	213.2	212.3	212.1	191.3	192.2	191.3	215.4	219.1	211.5	192.7	191.2	189.2	208.7	209.1	209.6	214.8	216.6	213	215.4	216.5	214.1
17.25	220.4	215.7	214.3	220.1	221.4	216.5	220.3	218.3	216.9	217.3	215.3	215.9	192.6	192.3	189.5	213	213.1	213.7	192.4	190.5	191.8	215.4	218.8	212.8	191.8	190.5	189.2	207.7	210.2	210.7	218.2	217.8	214.4	216.1	217.1	214.1
18	219.6	217.1	214.2	219.6	219.5	215.5	220.2	217.9	217.9	217.8	215.7	216.4	193.8	192.9	190.8	215.3	215.5	214.4	191.4	192.4	189.6	215.3	217.5	213.5	190.7	191	191.3	209.9	211.4	209	216.6	217.5	215.2	216.2	214.7	213.5
18.75	219.4	218.7	215.8	221.9	217.7	217	221.6	218.9	219.1	218.6	216.4	217.8	191.8	191.9	188.9	215.3	214.1	213.3	192.4	192.9	190.6	216.2	218.2	211.9	191.1	190.9	189.9	213.1	210.5	210.7	218.9	217.2	213.4	216	216.4	214.3
19.5	219.7	218.9	214.5	221.5	218.4	215	220.6	217.8	216.8	217.8	214.7	217.5	192.9	192.1	190.9	213.8	213.4	212.6	190.8	192.5	188.4	215	216.5	214.7	192.2	190.6	191	212.4	211.5	211.4	216.4	217.5	214.5	214.9	216.4	211.5
20.25	219.3	217.5	215.3	219.2	218.9	215.7	220.5	219.2	218.6	220	217.2	217.5	191.9	192.2	190.2	213.8	215.1	212.9	190.6	192.6	189.6	214.6	219.4	214.9	191.6	190.9	189.4	212.1	209.9	211	218	217.7	215.6	216.6	214.2	212.8
21	220.1	218	215.4	220	218.3	216.3	220.6	216.4	216	217.6	218.2	217	192.6	191.1	188.5	215.7	215	211.7	192.3	190.6	189.9	213.2	215.2	213.6	192.9	190.9	188.5	212.6	212.9	212.7	218.5	218.1	213.6	215.7	212.4	213.8
21.75	220.5	217.5	214.7	221.8	218.1	216	221.8	217.8	218.6	217.7	217.5	217.5	192.1	192.9	193.2	214.9	214.5	213.2	190.6	190.8	189.3	215.9	217.1	215	189.9	189.3	189.1	212.5	213	213.2	219.7	216.6	214.3	216.7	217.5	213.4
22.5	218.9	217.8	216.1	219.3	218.2	216.6	220.4	217.1	218	220.4	215.9	216.9	193	192.6	191.5	216.5	212.8	213.2	190.7	192.1	191.4	215.2	216.2	213.7	188.8	190.6	191.3	213.2	214.6	214.5	218.7	216.3	213.7	216.7	216	214.6
23.25	220.8	216.3	217.2	221.7	219.9	216.6	220.1	217.3	218.7	219.3	219.4	216.7	193.6	192.5	191.7	213.8	214	210.6	191.5	192.6	190.1	216.1	215.3	213.4	193.2	190.1	190.9	214	213.7	213	218.6	218	214.8	217.1	216.6	213.8
24	221.5	217.5	214.8	222.1	220	215.4	219.7	217.3	218.5	219.5	216.7	218.4	193.1	193.1	192	214.2	214.9	213.2	193.2	192.9	190.7	215.7	216.5	213.4	189.6	189.6	191	212.7	213.8	211.1	220.2	218.8	214.7	218	215.1	214.8
24.75	220.7	219.6	216.7	220.1	219.3	217.1	218.5	217.2	218.3	221.2	216.8	218	192.7	193.1	191.6	214.5	213.8	213.3	190.1	191.3	191.3	213.7	215.9	213.5	191.6	189.4	191.2	213.7	213.3	214	218.3	218.1	215.7	215.2	216.2	213.7
25.5	220.7	220.1	215.7	219.9	218.7	215	219.5	215.7	218.1	221.3	218.2	218.3	192.6	193.3	192	215.8	214.3	212.6	190.9	192.3	191.1	215.4	217.2	211.2	190.7	189.7	188.5	214.9	216	212.3	217.9	219.7	214.5	217.3	218.2	214.4
26.25	221.4	219.8	215.6	220.8	219.2	216	219.7	219.7	217.9	220.1	217.3	217.9	193.1	193.2	193.7	213	212.1	213.4	191.7	192.8	191.6	219.1	216.2	212.5	191.7	191.7	192.1	215.1	214.1	214	221.1	215.7	215.4	215.6	214.5	215.4
27	217.8	218.3	215.1	220.9	220	215.5	220.1	217.7	218.8	218.7	217.2	219.2	193.3	192.3	190.9	211.2	213.9	212.8	191.9	192.5	192.9	216	216.5	213.9	188.8	190.9	191.6	214	212.8	213.4	219	218.1	214.6	216.9	215.5	214
27.75	220.2	217.3	215.5	222.6	219.8	215.4	220.8	217.3	219.2	221	218.1	217.5	194	194.4	191	214.8	212.4	210	192	190.8	191.1	214.9	215	213.8	190.6	189.6	190.6	215.3	215.1	214.7	218	217.2	215.6	217.4	217	215
28.5	220.9	217.2	214.5	220.8	218.8	213.8	219.3	217.2	216.6	218.3	218.7	216.6	192.3	194.2	192.6	214.2	211.8	213	191.5	193.8	190.7	217.7	218.4	213.1	191.3	190.9	190.8	215.1	214.8	212.7	219.6	218.2	213.9	217.5	217.3	214.8
29.25	219.8	218.3	215.2	220.2	219.7	216.8	218.5	219.9	217.1	220.6	217	216.9	192.5	194.4	191.4	212.9	212.3	212.4	194.4	193	192.2	215.3	215.9	212.7	190.2	190.6	190	217.1	215.4	212.2	220	216	213.4	217.9	215.2	214
30	221	217.7	214.8	220.8	220	214.8	219.9	217.7	217.3	219.6	216.6	218.3	191	192.6	192.1	214	212.8	211.5	191.6	194.2	191.8	216.1	216.6	210.9	191.7	189.5	189	215.8	215.3	213.5	218.3	216.7	216.7	216.6	216.7	213.6
30.75	220.2	217	215.4	221.9	218.9	216.7	219.4	216.7	216.7	221.2	217.7	218	192	194.1	192.8	211.4	211	210.2	190.5	192.5	191.8	215.3	215.8	214.3	191.5	189.6	189.7	215.8	215.4	212.4	217.9	216	215.8	216.9	216.8	212.5
31.5	220.9	219.6	214.5	218.9	218.1	214.6	221.3	217.6	216.4	220.8	217.7	220.1	192.6	192.9	194.1	214.1	211.8	210	192.5	194.6	190.2	213.8	216	212.7	191.6	190.5	191.3	216.1	216.2	211.4	220	218.3	215.4	214.8	215.8	212.8
32.25	221.2	220.6	214.8	220.4	219	216.6	220.3	218.6	217.4	220.2	219.8	218.6	194.2	194.5	191.6	214.7	213.1	210.9	193.6	192.2	192.6	215.4	216	215.3	191.9	190.3	191.9	214.8	214.5	214.7	220.4	216.7	216.4	216.9	215.4	214.4
33	219.8	219.2	215.7	221	216.8	215	217.8	218.2	217.5	219.2	218.7	218.5	194.4	194.9	192.8	213.6	210.9	212.4	192.9	190.8	192.5	216.1	216.9	211.4	189.9	190.4	189.8	216	215.8	214	218.9	216.8	212.7	217	215.4	213
33.75	220.4	218.7	214	221.3	218.6	215.7	219.6	216.1	218	221.5	217.3	219.6	192.7	194.2	191	212.2	210.8	211.3	192.6	193.9	192.7	216.2	216.1	212.4	189.7	190.4	190.3	216.7	216.3	213.7	219	218.1	214	217	215.9	215.1
34.5	219.8	217.9	215.6	220.8	218.8	215.6	217.5	217.8	217.8	220.5	218.8	217	194.7	194.4	191.5	213.3	211.5	210	194.1	191.3	193.3	215	215.5	213.4	191.1	191.2	193.2	214.7	214.4	212.6	219.7	217.9	216	217.1	216.5	213.2
35.25	218.3	217.5	214.4	220.2	218.7	215.7	219.8	216.8	215.8	219.8	219	215.7	195	194.9	192.6	213.4	210.8	208.9	194.1	192.6	192.9	214.7	213	212.1	191.8	191.6	192.2	214.2	213.7	215.2	219.1	217.7	213.6	219.6	216.6	213.3
36	220.6	217.6	215.1	219.2	217.2	217.2	220.5	215.8	216.7	221.1	217.5	219.3	195.4	196.9	189.9	211.8	211.6	211.2	193.3	191.3	192.9	213.6	219.2	210.3	192	192.8	192.9	214.2	212.4	213.9	220.5	219.4	213.4	217.9	216.1	215.4
36.75	220.4	218.4	215.8	220	219.9	213.3	219.8	217	217.7	221.9	217.5	218.1	195.6	194.6	192.7	212.5	211.8	208.9	192.9	195.6	191.9	215	217.8	213.6	190.8	192.2	191.6	215.9	215.6	216	220.2	217.3	214.6	217.1	215.9	213.8
37.5	221.7	218.9	213.9	219.5	220.3	214	220.1	216.7	216.7	218.9	218.7	217.7	193.1	193.9	194.6	214.1	212.1	209.6	195.4	193.6	191.6	215.3	215.4	212.7	191.9	192.4	190.4	218.4	215.8	215.8	217.8	217.8	213.3	217.5	214.6	216.2
38.25	218.9	218.2	215.2	218.9	218.1	215.7	220.3	215.8	216.5	221.5	217.3	216.7	193.3	196	191.1	210.8	212	209.4	194.5	194.4	194	215.4	215.3	212.4	190.7	192.7	191.8	217.3	215.6	215.2	219.7	217.2	213.8	217.5	215.4	214.7
39	219.3	217.9	214.3	218.2	216.9	213.3	218.3	216	217.4	219.3	220	217.4	194.1	196.4	195.3	212.7	212.1	210.7	193.7	192.8	193.2	213.4	216.8	211.4	192.9	192.1	191.1	215.6	214.5	214.3	218.7	216	215	218	216	216
39.75	219.1	218.1	216.7	220.9	219.1	215.2	217.9	216	217.3	220.2	220.6	217.6	193.4	193.2	193.4	212	211.9	209.7	193.8	194.4	192.5	215	217.5	213.3	192.3	192.1	192.1	217.8	217.2	213.2	219.7	217.5	214.2	217.9	216.8	214.4
40.5	220.5	218.8	214.6	220	219.9	214.1	220.3	216.1	216.5	222.1	218.1	218.4	196	192.2	194.3	211.5	210.9	209.5	192.5	193.8	193.6	216.1	215.7	212.1	191.2	191.7	193.1	214.4	216.2	213.8	219.5	217.8	213.8	218.3	216.3	214.2
41.25	217.9	217.5	214.2	218.6	220.3	215.1	219.4	218.2	215.6	220.8	218.9	219.4	194	194.2	193.1	213.4	212.7	208.8	193.5	194.1	193.7	214.5	216.4	211.8	190.9	192.3	191	217.8	215.4	215.6	220.4	216.6	215.4	217.6	215.7	215.4
42	219.2	219.7	215.1	221	217.3	214.6	218.7	217.5	217.3	221.3	219.6	218.6	194.3	195.4	194.7	213.6	209.9	208.4	194.1	193.8	192.3	214.7	215.6	210.9	192.2	192.3	192.3	216.1	214.1	213.3	219.8	216.2	216	220.9	216.3	213.1
42.75	220.4	217.4	213.9	219.9	220.4	214.2	218.6	215.9	216.2	219.9	219.5	219.4	193.3	194.8	194.7	210.2	211.2	210.5	195	194.5	192	213.3	215.9	212.6	191	192.2	192.6	214.9	215.1	212.9	219.6	217.6	214.3	219.1	217.1	213.7
43.5	219.6	217.6	215.4	218.5	216.7	215.6	220.5	216.1	216.1	220.7	218.9	220.1	192.8	195.9	193.5	212.1	212.2	211.1	194.4	194.5	192.3	214	216	212.4	192.4	192.2	192.8	217.3	215.5	214.3	219.5	218.2	214.4	219.1	216.9	215.4
44.25	219.6	216.6	215.3	220	217.1	213.8	219.5	215.7	215.7	222.6	217.8	220	194.8	194.3	192.9	210.6	210	209.4	192.2	194.6	193.6	215.9	216.4	213	191.1	190.9	192	216.1	217.1	216	218	216.6	212	218.9	215	215.2
45	215.9	215	213.5	215.7	212.5	211	215.4	212.3	210.6	220.3	216.7	215.1	195.4	195.9	195.3	210.1	210.4	207.7	194.9	193.6	194	209.9	211.7	207.4	191.7	193.8	193.2	210.1	210.3	209.7	215.6	216.7	213.2	214.3	211.7	214.1

## Sheet: Fig 7H-1
Time (min)	R72C			M57V			Q312L			V260M			L254P			Y53F			R55H			D389Y			C250A			A371T			D389G			WT
	Rep 1	Rep 2	Rep 3	Rep 1	Rep 2	Rep 3	Rep 1	Rep 2	Rep 3	Rep 1	Rep 2	Rep 3	Rep 1	Rep 2	Rep 3	Rep 1	Rep 2	Rep 3	Rep 1	Rep 2	Rep 3	Rep 1	Rep 2	Rep 3	Rep 1	Rep 2	Rep 3	Rep 1	Rep 2	Rep 3	Rep 1	Rep 2	Rep 3	Rep 1	Rep 2	Rep 3
0.75	249.7	240.7	253.4	253.1	247.4	257	251.3	248.5	253.1	231	230.6	237.7	187.5	184.3	187.9	246.6	244.1	247.4	196	197.5	195.6	238.7	240.7	250	185.3	189.4	189.2	259.1	243.7	253.5	251.2	247.9	255.2	255.4	256	258.5
1.5	250.4	241	252.8	252.2	247.4	256.5	250.6	248.7	253.4	231.5	232.6	237.7	189	184.5	188.1	246.4	245.4	246.5	195.3	196.8	196	238.4	240.6	250.9	187.2	188.5	188.7	258.4	244.7	254.4	249.7	248.1	254.3	255.4	255.9	257.3
2.25	252.1	241.2	253.6	253.1	248.4	256.2	251.1	248.4	252.8	232.7	233.2	236.3	189.4	184.9	188.4	245.5	245.1	245	196.2	195.9	195.6	239.1	242.1	251	186	188.2	189.2	258.5	243.3	253.7	251.3	249.2	253.6	255.7	255.8	257.9
3	250.1	243	254.2	252	249.5	255.6	250.1	249.9	254.9	234.3	234	238.6	189	185.3	188.9	245.7	247.3	245.7	196.3	196.7	195.6	239.7	240.5	252	184.9	188.6	190.1	260.1	244.4	252.9	251	249.4	254.3	255.5	255.2	259.1
3.75	251.1	243.6	253.4	252.3	249.4	258.1	249.3	250.6	254	233.4	235.9	239.7	189.7	186.7	187.8	245.1	246.5	246.8	196.4	196.9	195.9	242.1	242.4	251.3	187.2	189.5	188.7	258.3	244.1	253	251.2	250.2	254.8	255.5	256.5	257.3
4.5	250.1	243.9	253.5	253.1	250.3	256.5	249.7	250.7	254.2	233.7	236	238.5	189.3	184.7	186.6	245.3	246.8	246.1	195.6	196.5	197	241.5	242.2	251.5	185.4	188.3	188.9	258.1	244.7	252.8	251.4	249.4	254.2	256.1	257.1	258.4
5.25	250.3	243.9	253.7	251.7	249.5	255.3	250.3	250.7	253.7	234.6	235.8	240.1	188.4	185.4	186.7	247	247	245.7	196.2	196.9	196	243.1	244.2	251.4	188.8	190	188.8	259.3	245.4	253.9	251.8	249.2	254.5	255.5	255.9	257.2
6	250.5	244.7	253.6	251.1	249	255.8	250.5	250.5	254.2	234.4	234.9	238.5	188.2	184.5	185.7	246.2	246.3	248.1	196	197.2	196.2	243.5	243.2	251.2	186.7	188	188.6	259.3	244.4	252.2	251.7	249.7	254.2	255.2	255.5	258.2
6.75	250.9	246.7	254.8	252.2	249.8	256.2	248.8	251	254.3	235.3	235.1	240.6	187.8	185.1	187.2	246.4	247.6	244.8	194.4	195.7	195.4	243.7	244.3	252.2	185.6	186.8	189.1	258.6	244.8	252.2	249.9	249.6	254.3	256.6	254.7	257
7.5	250.9	245.4	253.2	250.1	251.3	255.5	249.4	251.1	253.4	235.9	235.7	240	189.3	186.2	186.7	246	245.1	245.2	196.6	197.1	195.6	243.5	246.3	252.3	185.6	189.2	187.7	259.3	245.1	254	249.8	249.8	254.7	256.1	255.9	258.6
8.25	249.3	246.7	252.9	250.7	252.5	253.7	248.7	250.9	253.2	234.3	237.1	240.7	188.8	185.7	187	245.5	247	246	196.8	197	194.6	244.6	246.1	251.4	187.3	189.6	188.6	259.4	244.5	253.8	252	250.1	255	256.4	255.9	258.2
9	249.4	247.6	254.4	249.1	251.5	256.1	250	250.2	254.1	235.2	235.4	241.2	188.4	185.3	187.7	246.9	246.4	244.5	195.8	196.5	197.2	244.5	245.6	251.1	187.2	187.6	187.1	260.1	245.6	253.4	252	249.3	255	255.7	256.2	258.2
9.75	250.6	248.1	253.6	250.5	251.4	255.3	248.9	252.4	254.4	235.7	236.6	240.7	188	186.2	188.2	246	246	245	195.5	196.6	197.2	245.8	246.6	250.6	185.3	187.7	188.9	259.9	245.3	252.8	251.4	250.5	254.7	257.4	256.2	259.2
10.5	249.4	249.7	254.4	251	251	255.1	248.9	250.2	253.5	236.7	237.3	242.1	188.6	184.7	186.5	247.3	245.5	245.4	196.8	196.5	195.7	245.1	245.8	251.3	186	187.1	188.5	259.1	245	253.1	251.4	249.7	254.9	255.7	256.9	259.1
11.25	242.8	239.7	245.4	240.6	241.4	243.5	229.6	238.8	239.6	231.9	232.2	237.1	187.8	185.9	186.2	244	244.5	241.7	196	196.7	196.9	234.4	234.5	239.8	186.3	188.3	189	255.5	241.3	246.6	240.3	239.9	242.1	245.1	249	247.2
12	242.1	239.7	244.7	239.3	241.7	242.6	228.7	238.2	237.4	232.7	232.5	236.9	188.4	185.7	186.6	243.9	244.2	241.6	195.2	196.2	196	232.9	233.4	236.6	186.9	186.4	188.4	253.4	240.8	245.5	238.6	238.7	240.3	245.2	248.2	244.9
12.75	241.3	239.2	243.4	238.6	240.4	240.8	227	236	236.3	231.5	231.6	235.5	189.6	185.4	186.2	244	242.5	239.9	195.3	196.3	196.9	232.1	233.7	236	185.6	187	189.8	253.7	237.3	244	237.2	237.4	238.6	244.7	247.4	243.6
13.5	241.1	239.8	242.2	237.2	241	241.3	226.5	237.8	236.7	231.4	232.1	235.4	188.6	186	187.4	241.9	241.7	238.6	196.3	196.1	196.5	230.3	233.2	236.4	186.5	186.6	188.3	252.7	241	243.8	237.1	236.7	240.2	244.6	247.1	242.9
14.25	239.7	238.7	241.8	237	240.4	239.9	224.3	236.7	236.4	230.4	231.7	237.3	188.6	183.1	186.8	241.3	241.5	238.4	196.3	196.6	197.1	230.8	231.3	234.9	186.3	185.7	188.7	251.2	238.4	244.4	234.5	235.5	238.1	241.3	246.3	242.8
15	238.8	239.2	241.9	235.1	237.1	239.4	225.6	236.3	236.9	230.3	230.3	236.6	189.4	184.9	186.2	239.7	240.4	239.6	195.8	194.9	196.4	229.1	230.3	234.4	185.7	186.4	188.9	249.7	239.1	243.7	234.8	235.9	238.4	242.1	244.8	242.6
15.75	235.9	239.9	241.5	234.5	236.7	239.2	225.4	233.8	235.3	231.1	229.7	235.2	186.7	185.5	186.1	239.5	241.5	239.3	196.3	195.6	197	229.1	230.6	234.1	185.7	186.6	188.2	250.3	237.6	243.1	233	233.3	236.9	241.4	244	242
16.5	237.6	240	241.5	234.7	235.6	238.9	224.7	234.4	235.5	231.1	231.1	235.6	189.2	185.2	186	239.1	239.5	237.9	194.6	196.4	197.4	228.1	228.8	234.2	184.7	186	189.2	250.2	237.7	243.9	233.6	233.3	237.3	239.2	242.3	242.3
17.25	236.6	238.8	241.6	234.7	237.1	238.8	222.4	234.3	236.8	231.7	230.7	236.1	188.6	184.5	186.5	238	239	238.5	193.7	195.3	196.3	225.8	228.2	234.1	185.4	185.6	188	250.2	237.2	243.5	232.8	233	236.1	241.1	244	242.2
18	235.1	238.1	240.4	232.9	237.1	238	222.8	232.6	235.5	229.7	231.3	237.3	187.9	184.4	187.3	238.8	241.4	239.6	194.6	196.3	196.1	227.3	227.2	233.5	183.7	185.3	188.4	248.9	238.2	243.7	233.2	232.1	236.8	239	242.8	242.4
18.75	236	238.2	242	233.5	236.7	239.2	223.5	233.3	236.5	230.7	230.7	235.1	186.7	184	186.9	238.9	239.2	239.2	195	195.4	195	225.7	228.7	232.1	184.7	186.2	188.6	248.8	238.2	242.8	231.5	232.1	235.8	239.3	241.5	242.7
19.5	234.9	237.2	241.3	232.7	235	238.4	222.7	232.6	235.9	232	231.1	236.2	186.4	184.7	186.4	237.8	238.8	238.2	193.8	194.4	197	226.4	229.3	233	184	186.2	187.8	249.3	237.2	242.3	231.7	232.3	236	238.8	241.5	241.4
20.25	234.2	237	241.3	233.2	234.4	237.9	223	234.4	234.6	230.3	232.4	236.8	188	182.7	185.7	238.7	239.9	239.2	194.1	194.5	196.8	226	228.3	232.4	184.8	186.7	188.9	249.5	237	242.6	232.3	231.4	235.2	239.8	239.9	239.3
21	234.7	236.7	241.5	232.7	235.1	238.4	223	233.1	235.3	231.1	232.2	238.8	187.1	185.6	187.8	239.5	239.8	238	196	195.3	195.9	226.6	226.6	233.4	184.4	185.7	188.8	249.3	235.1	241.7	231.2	230.3	235.1	237.5	240.3	240.7
21.75	236.2	237.1	240.1	232.6	235.4	237.6	224.1	232.5	234	231	231.4	236.5	188.2	185.1	186.7	238.2	239.8	238.9	195.3	194.3	196.2	226.6	228.4	232.6	184.5	185.4	186.6	248.9	235.8	243.2	230.5	231.8	235.2	237.4	240.8	239.8
22.5	234	236.3	241.6	232.5	234.8	237.8	223.8	232.2	234.8	230.8	231.6	236.7	187.6	185.4	184.7	238.9	239.2	238.9	193.8	194.4	198.4	225.4	226.9	232	184.4	185.4	189.4	247.9	236	243.3	231	229.9	234.9	238.2	240.6	241.2
23.25	236.4	236.5	239.8	231.4	235	238.5	222.2	233.3	235.5	231	232.4	238	188.1	184.3	186.9	237.9	238	240.3	194.3	195.2	196.2	225.5	228.5	231.8	182.9	185.7	188.9	249	236.3	242.3	230	229.4	233.6	237.1	239.6	241.1
24	233	237.3	240.8	233	234.1	237.1	223	233	234.5	230.4	233.4	237.8	187.2	185.4	186.2	237.7	239.4	240.3	196.1	195.2	196.6	225.8	227	232.6	183.2	185.8	187.6	249.3	236.9	242.8	229.6	230.6	234.9	239	239	242.4
24.75	234.3	236.7	240	232.6	234.8	238.2	223.7	232.2	233.7	230.5	232.4	237	187.1	183.3	186.6	238.3	240.6	239	195.5	194.9	196.9	226.4	227.8	231.7	184.5	185.6	186.9	248.5	236.5	243.7	229.2	231.5	235.9	238.1	239.5	240.2
25.5	233	235.3	241.4	232.4	236.1	239.3	223.8	233.3	236.3	230.2	232.7	238.6	187.4	184.4	187.2	239.5	240.7	238.1	194.6	194.8	197.1	225.7	226.9	232.1	185.1	186.5	188.6	247.9	237.5	242.7	230.2	230.3	235.2	238.1	239.7	241
26.25	234.7	235.9	241.7	231.3	234.3	238.7	223.1	232.5	235.3	231.9	234.6	238.2	188.4	184.3	186.8	238.7	240.3	239.2	194.7	194.8	198.1	225.6	228.3	231.1	184.4	185.2	188.6	247.9	236.8	243.2	229.2	230	235.2	238.1	239.9	240.7
27	235.3	235.8	241.3	231.5	235.4	238.8	224.1	233.9	235.5	230.1	233.9	237	187.5	184.5	186.7	238.8	240.1	239.2	194.1	195.7	197.4	227.9	228.7	231.6	184.3	186.4	188.4	248.6	237	242.3	231.2	232	234.6	239.3	240.1	241.4
27.75	234.5	236	239.5	232.4	234.7	238.9	223.9	232	235.3	231	233.3	238.5	187.1	184.7	187.9	239.3	240	239.2	197.3	195	196.1	226.1	226.8	232.4	183.1	187.5	186.9	247.4	236.9	243.7	231.4	231.3	234.1	239.4	239.1	241.6
28.5	234.6	236.3	240.6	231.9	235.3	237.7	225.4	231.3	235.4	232	233.6	240	186.8	184.8	186.1	239.3	239.6	237.1	195.8	195.5	196.1	227.3	227.7	231.5	184.7	185.9	188.3	249.3	237.4	243.7	230.4	230.8	235	239.6	238.7	241.8
29.25	235.2	237.2	239.8	232.5	236.6	238	224.7	232.6	235.4	231.9	233.1	238.1	188.4	185.4	188	238.8	239.8	238.4	196.3	193.9	197.4	225.4	228.7	231.7	183.7	185.5	187.9	247.9	238.1	242.4	231	231	235.5	240.2	239.9	241.1
30	235.7	236.3	239.7	233.5	235.6	238.4	223.8	232.6	234.6	233.1	234	236.7	188.3	184.1	186	238.8	240.2	238.1	195.5	196.7	195.8	226.8	228	230.6	184.5	185.7	187.6	247.9	237	242.9	230.6	231	235.2	239.1	239.6	241.9

## Sheet: Fig 7H-2
Time (min)	R72C			M57V			Q312L			V260M			L254P			Y53F			R55H			D389Y			C250A			D389G			A371T			WT
	Rep 1	Rep 2	Rep 3	Rep 1	Rep 2	Rep 3	Rep 1	Rep 2	Rep 3	Rep 1	Rep 2	Rep 3	Rep 1	Rep 2	Rep 3	Rep 1	Rep 2	Rep 3	Rep 1	Rep 2	Rep 3	Rep 1	Rep 2	Rep 3	Rep 1	Rep 2	Rep 3	Rep 1	Rep 2	Rep 3	Rep 1	Rep 2	Rep 3	Rep 1	Rep 2	Rep 3
0.75	214.4	216	220.6	236.2	234.1	238.8	242.3	232.1	233.8	216.5	217.8	210.1	177.8	181.4	179.3	216.3	219.8	215.6	184	183.8	180.1	214.7	218.9	219.6	175.9	173.7	172.3	200.2	219.4	217.6	260.7	255.5	253.6	255.7	249.8	243.1
1.5	215.2	216.6	220.5	235.8	236.3	240.5	241.9	231.8	233.4	215.9	217.1	210.7	180	181.4	180	216.3	219.4	215.8	184	184.2	181.9	216.1	220	219.3	175.4	174.1	171.1	199.6	220.3	219.4	261.2	255.6	251.9	255.7	250.9	241.5
2.25	215	217.3	221.5	234.3	234.7	240.5	241.5	233	235.3	219.1	219.6	211.3	179.9	180.8	179.1	214.7	219.6	216.1	182.8	182.5	182.8	217.3	222	220.4	175.1	174.8	171.8	200.8	220.4	218.6	262.9	256.5	254.5	256.1	249.6	242
3	215.9	216.4	221.3	236.2	234.5	240.5	242.2	232.2	233.8	216.6	218.6	211.1	179.9	180.5	179.8	216.8	219.2	216.5	184	184	182	216.9	219.9	219.3	175.2	174.3	171	200.8	221	220.4	261.7	256.2	254.4	256.3	250.5	243.8
3.75	216.7	217.6	224.1	237.5	233.8	241.1	243.2	232.8	235.7	218.9	220.3	212.3	180	182.2	179.6	215.6	218.5	216.1	184.3	184.5	183.2	216.5	221.8	220.1	173.7	174.1	173.8	200.6	221.9	220.6	260.6	256.4	254	254.4	250.1	242.4
4.5	215.7	218.5	222.3	236.5	235.9	240.4	243.3	233.9	236.2	219.3	220.2	212.3	180.4	180.4	179.2	215.8	220.4	215.4	184.1	183.8	182.8	216.5	220.8	220.1	174.9	174.7	172.2	200.5	221.9	221.6	261.7	256.7	256	254.4	250.2	244.7
5.25	215.9	218.2	223.1	237.6	235.6	240.6	243.1	233.4	234.1	219.8	220.4	214.4	178.6	179.5	180	216	219.6	216.5	183.8	183.7	182.8	215.7	221.6	221.3	173.4	174.9	170.3	199.4	223.3	220.9	262.1	255.9	254.7	256.2	250.7	244.2
6	215.7	218.1	222.9	237.9	235.1	240.2	242	233.4	235.4	219.6	222.2	214.6	181.6	180.1	178.1	217	220.5	215.7	184.7	185.7	180.9	218.5	222	219.9	175	174	171.1	201.3	223.2	221.5	261.1	256.4	255.9	255.1	251.2	243.6
6.75	217.7	218	224.2	236.3	237.5	239.3	242.8	234.4	235.1	219	222.4	214.4	180.6	179.6	180	216.7	221	217.1	184.1	184.6	182.8	218	222.2	221.9	174.8	175.5	173.4	201.8	223	223.2	261.6	257.2	254.2	256.4	250.4	243.3
7.5	216.8	218.1	223.1	236.6	235.7	241	243.1	233.3	235.5	220.6	221.8	214.8	180.4	182.1	177.4	216.8	221.5	217.4	184.3	185.2	181.3	219	221.3	221.4	174	175.3	172.9	201.7	224	223.2	261.3	256.2	255.3	256	250.1	244.5
8.25	218.8	220.2	225	238	235.8	240.2	243	234.7	235.8	221.8	222.9	215.1	180.8	182	178.7	216.8	221.5	216.3	184.8	183.4	181.2	218.3	222.3	222	176.4	174.6	171.5	203.6	224.5	224	261.9	257	255.8	254.3	251.4	245.6
9	218.2	220	224.7	237.2	235.8	241.3	242.6	234.8	235.3	221	223.6	214.8	179.8	180	179.5	216.8	221.3	217.1	183.6	186	183.4	218.9	223.8	221.5	175.3	174.8	173.2	203.2	224.5	224.9	261.9	255.7	255.5	257.2	250.6	245.9
9.75	218.6	220.6	226.2	238.6	237.3	240.4	242.6	234.3	235.6	223.5	223.9	214.7	181.9	181	180.6	217.6	221.6	218.8	183.8	184.4	182.7	219.2	223	223.3	175.8	173.8	172.2	203.1	224.6	225.1	262.3	257.2	255.6	257.2	250.8	245.8
10.5	218.5	221.3	226.1	237.6	237	239.8	242	235.4	236.2	221.6	223.9	216.5	181	179.8	178.8	220	221	217.8	185.2	183.6	182.5	218.5	221.7	223	175.3	173.8	171.4	203.4	226.2	225.3	261.6	258.2	255.9	255.3	252.6	245.3
11.25	222.3	220.1	220.9	230.3	227.2	227.8	229.4	220.6	221.4	220.4	220	212.6	176.8	176.2	176.1	216.2	216.2	213.8	183.3	179	178.9	214.4	215.1	212.3	171.4	171.8	167.5	191.9	215.9	214	265	261.3	256.4	243.6	237.3	232.9
12	222.5	218.2	223.5	232.1	229.5	226.9	228.9	221.1	220.8	220.7	221.9	215.5	177.8	177.5	176.9	218.6	218.4	213.6	184.5	179.8	178.3	215.9	215.7	211.6	172.9	171.3	167.1	191.4	216.9	211.8	265.8	261.9	256.6	243.1	236.9	232.3
12.75	221.8	218.2	224.2	231.1	229.2	227.3	229.5	222.2	220.3	221.5	223.4	217.7	177.1	177.2	176.3	217	217.3	215	184.1	180.5	178.6	215.4	215.2	212.1	172.5	172.2	168.1	191.4	216	214.5	263.9	260.7	255.5	241.7	236.4	230.8
13.5	222.1	219.6	224.7	231.2	228.9	228.5	228.7	222.6	222.2	222	221.6	217.9	177	177.5	176.9	218.9	218	214.2	184	179.7	178.6	215.2	216.1	212.6	172.8	171.4	167	191.2	216.1	214.9	264.4	260.6	256.7	242.6	236.6	231.7
14.25	222.6	220.6	226.4	230.1	229.5	228.3	228.1	222.7	222.1	221.5	223.4	218.4	177.5	177.1	177.5	218.5	217.9	214.9	183.8	179.4	178	214.8	214.4	210.3	172.6	172.9	168.1	193.2	215.4	213.3	264.4	260.7	256.9	243.2	237.4	231.7
15	223.1	221.7	225.9	230	228.7	227.7	228.6	221.3	221.5	222.8	224.7	218.4	178.2	178.5	176.4	218.9	219.2	215.3	184.8	180.6	178.1	215	214.6	211.4	173.2	171.8	168.3	192.3	216.3	213.4	264.3	260.6	255.2	241.3	235.5	231.6
15.75	223.4	221.6	227.7	227.9	227.4	226.7	228.2	223.6	222.4	225.3	225	218.4	177	177.1	176.1	219.8	220.1	215.6	185	180.9	179.5	215.1	214.9	211	174	171.2	167.2	193.4	218.3	212.9	263.1	261.6	255.8	240.9	235.9	232.1
16.5	223.5	222.2	226.3	230	229.7	228.3	227.1	223.9	222.5	224.4	223.3	220.2	178	176	177.3	220.9	219.9	216	182.5	180.1	178.6	214.7	214.2	209.6	172.7	171.8	167.4	194.7	219.1	214.9	265.5	260.5	256	239.6	233.7	232.2
17.25	225	222.7	227	229.7	229.8	228.2	226.1	224.3	222.7	225.8	224	219.2	178.3	178.5	177.4	220.2	220.1	215.2	183.8	182.3	179	215.5	214.9	212.1	172.3	170.9	167	193.5	219.3	213.8	264	261	255.3	238.6	235.1	231.3
18	224.4	223.2	226.9	229.1	229.4	228.1	228.6	223.1	223	225.4	226.6	221.1	179.5	177.9	176.5	219.6	220.4	214.3	183.6	180	177.7	215.3	216.6	209.1	172.3	171.6	165.1	194.7	217.3	213.8	262.4	260.9	256	238.8	234.4	232.3
18.75	223.7	223.4	226.6	228.7	229.6	227.8	226.3	225.4	220.9	227.5	225.5	221.4	178.7	178.2	178.8	220.4	219	215.8	182.6	180.8	179.6	215.6	215.7	208.8	172.6	171.3	166.1	194.3	219.1	215	264.2	259.9	256.7	238.9	232.9	232
19.5	224.1	225.2	227.5	229.3	229.6	228.9	226.3	223.2	224.2	226.6	226.2	222	178.6	176.7	176.1	220.7	220.7	217.1	183.7	180	177.5	216	216.3	210.3	172.9	172.4	167.2	194.1	219	215.5	264.2	260.2	256.5	239.1	234.6	231.4
20.25	225.1	224.2	227.2	229.1	228.4	228.4	226.7	223.8	222.5	227.1	225.9	223	178.6	178.3	176.2	222.6	221.1	217	183.1	180.5	179.6	216.2	216.4	211.5	171.2	172.5	168.3	193.6	218.6	214.6	262.7	261.1	257	239	234.5	231
21	226.2	226.7	228.6	230.3	229.2	225.5	223.9	223.3	221.1	225.9	226.7	222	177.6	178.7	176.2	221	223.3	217.5	184.8	179.5	178	216.6	214.7	210.8	171.9	171.4	167.1	193.9	221.2	217.1	265.3	262.3	256.2	239.9	233.8	230.4
21.75	225.1	225.1	227.5	229.4	230	226.9	224.6	224.3	221.7	226.5	227.1	223	178.3	177.8	177.1	220.6	223.4	217.7	183.1	180.8	178.8	215.4	215.2	210.3	171.4	173.8	167.4	194.3	220.1	217.1	263.4	259.3	256.9	237.8	233	231.9
22.5	226.2	225.4	228	229.3	229.1	226.5	224.2	223.6	220.9	226	228	223.4	178.1	178.3	175.5	221.5	224	217.1	183.7	182	179	214.7	218	211.1	172.7	171.6	170	194.4	220.5	217.8	264.2	261.6	256.1	237.1	233.1	231.2
23.25	226.8	224.6	229.1	227.6	228.7	226.2	224	224.2	220.1	226.9	228.9	224.5	178.6	180	175.5	221.9	221.8	219.7	184.4	182.2	179.4	214.4	218.2	211.2	172	173.2	167.5	195.4	220.4	218.6	262.2	260.4	256.6	236.7	235.7	232.2
24	226.1	226.7	230	228.8	228.7	225	224.5	224.5	222.5	227.5	228.3	223	177.8	177.6	177	221.5	220.7	217.6	184	181.4	178.6	215.5	216.9	209	173.2	171.5	168.3	193.2	220.6	217.9	262.6	259.8	255.6	237.2	234.2	232.2
24.75	227.1	226.4	228.6	230	229.9	227.3	223	224.7	222.7	227.4	228.5	222.7	178	178.4	175.7	222.3	223.2	219.4	182.7	183.6	176.7	215.4	216.6	212.3	171.4	170.7	168.4	195	221.6	217.7	262.4	260.8	256.7	236.1	235.4	231.7
25.5	227.4	225.9	231.4	228	229.4	226.5	224	225.6	221.6	227	231.4	224.8	177.7	178.1	176.7	222.5	222.2	216.4	184.9	181.3	179.7	214.9	216.3	211	172.5	172.1	167.8	195	220.6	218	264.1	260.7	256.5	237	236.2	231.3
26.25	227.4	227.8	232.1	230	229.1	228.3	225.5	224.3	221.6	229.1	230.5	224.8	178	179.3	177	222.7	223	219.5	184.5	180.9	178.4	215.7	217.1	212.5	170.5	172.8	167.8	195.1	220.7	218.1	263.2	260.4	257.2	236.1	235.6	230.9
27	227.9	227.8	232.2	230.7	230.1	227.6	225.4	224.3	222.3	228.8	230.1	225.4	179	177.1	177.5	222.4	221.3	218.9	184.7	180.9	179	215.5	215.3	211.1	172.3	172.2	168	194.3	222.5	218.7	261.7	260.8	255.6	235.9	234.7	230
27.75	227.7	228.2	231.1	230.3	228.6	227.7	224.8	224.3	222.7	230.4	232	226.5	179.8	178.9	176.8	222.9	222.3	218	182.8	181.7	178.4	215.5	216.3	211.1	172.6	172.6	168	195.6	221.4	218.4	262.5	260.8	255.7	237.4	234.4	231.2
28.5	228	228.1	231	230.5	228.2	228.4	224.3	224.4	221.9	229.3	231.4	225.2	178	178.6	177.1	221.7	222.5	219.2	184.4	183.6	178.6	217.2	216	210.6	171.6	172.6	168.1	194.7	221.7	219.2	262.9	260.4	256.1	237.2	233.7	231.4
29.25	228.4	228.2	230	229.7	228.1	227.1	225.1	223.8	222.6	229.5	232.8	226.7	177.5	179.1	175.8	223.6	222.2	218.5	184.7	181.9	177.5	217	215.9	212.1	171.9	172.6	168.3	196.6	220.7	219.7	263	259.1	255.2	236.8	233.4	231
30	228.8	228.8	230.5	230.4	228.3	226.1	225.8	225.1	221.7	229.8	231.4	226.9	178.4	180.1	177.7	223.9	222.5	218.9	184.6	182.6	180.5	215.7	215.9	211.8	172.4	171	169.7	195.7	222.7	218	260.9	259.9	254.5	236.3	235	232.4

## Sheet: Fig 7H-3
Time (min)	R72C			M57V			Q312L			V260M			L254P			Y53F			R55H			D389Y			C250A			D389G			A371T			WT
	Rep 1	Rep 2	Rep 3	Rep 1	Rep 2	Rep 3	Rep 1	Rep 2	Rep 3	Rep 1	Rep 2	Rep 3	Rep 1	Rep 2	Rep 3	Rep 1	Rep 2	Rep 3	Rep 1	Rep 2	Rep 3	Rep 1	Rep 2	Rep 3	Rep 1	Rep 2	Rep 3	Rep 1	Rep 2	Rep 3	Rep 1	Rep 2	Rep 3	Rep 1	Rep 2	Rep 3
0.75	233.4	229.3	228	232.9	230.1	230	233.4	231.6	227.3	211.9	214	218.2	173.3	171.4	168.6	220.7	231.9	227.7	185.3	182.4	182.9	235.5	232.9	232.2	176.1	179.8	172.7	213.1	221.3	216.6	232.1	230.4	231.7	220.3	219.8	237
1.5	230.9	229	228.3	233.1	231.8	227.3	231.8	230.6	227.1	213.4	214.2	218.5	174.3	172.2	169.5	222.1	230.8	227.1	186.8	182.7	181.8	235.9	232.8	232.9	175.8	178.5	174.1	214.6	219.8	217.4	232.1	228.9	231.4	222	219	237
2.25	232.7	227.3	228.6	232.4	231	229	232.1	230.4	229.3	212.9	217.2	219.2	172.4	171.7	169.4	222.9	230.8	228.9	186	184	183	235.6	233.7	232	175	177.4	175	214.5	221.6	218.2	233.7	230.6	230.6	222.5	219.5	235.8
3	233	227.6	228.2	232.8	229.5	227.5	231.6	230	227.9	211.6	215.1	217.9	173.8	171.7	166.3	223.3	230	228.3	184	183.9	183.4	236.6	233.7	232.1	174.8	179.1	172.7	215.6	220.2	216.5	232.4	230.6	230.3	221	221.5	236.2
3.75	232	228	228.1	233.5	230.2	227.6	232.9	230.9	228.6	214.3	214.8	219.3	172.9	171.5	168	222.2	230.7	227.9	185.4	183.7	182.4	237	234.7	232.9	176.7	176.9	176.1	216.5	222.2	217	232.1	231.4	231.5	221	218.9	236.4
4.5	231.9	228.9	230	234.7	230.2	228.4	231.9	229.1	228.4	214.7	215.3	219.3	173.9	171.8	167.9	223.7	228.7	228.1	187.2	182.4	183.1	237.7	234.1	233.4	174.6	178.6	174.5	215.4	220.7	219.1	232.5	229.6	233.3	222.9	220.9	235.7
5.25	233.1	229.2	230.5	232.1	230.8	226.9	234.3	231.1	227.7	213.6	215.6	220.7	173.8	171.6	166.8	224.3	230.2	228.5	185.4	183.8	181.7	236	236.2	231.7	175.4	179.3	173.8	216.8	220.2	219.5	233.1	231.3	231.7	222.1	221	236.2
6	233.5	228.8	229.3	233.1	229.9	227.8	234.2	229.1	226.8	214.3	218.6	220.6	171.8	170.7	168.9	223	231.1	227.9	185	183.8	184.1	237.6	234.3	231.9	176.4	177.9	174.5	217.3	220.5	216.8	233.4	229.4	230.6	222.1	218.9	237.4
6.75	230.7	228.9	229.1	233.5	230.4	228.5	232	230.7	227	214.4	218.2	218.1	173.3	173.7	169.7	223.6	229.6	227	186.9	183.4	182.6	237.8	234.7	231.8	174.5	178.1	174.2	217.2	219.8	219.1	232.5	229.5	232.2	221.7	219.8	235.4
7.5	232.7	227.8	229.7	233.3	228.8	226.5	231.9	231.7	227.3	216.4	219.4	219.5	173.3	173.8	168.1	225.3	229.7	227.1	185.3	184.3	184.3	236.1	234.9	232.9	176.3	179.1	174.5	218.8	220.4	217.9	232.2	230.9	230.3	224.1	220.4	236.2
8.25	233.7	228.9	228.5	233.8	230.9	228.6	232.7	233.1	228.1	215.4	218.1	220.2	173.3	173.3	167.7	224.7	228.8	226.9	186.2	184.9	183	238	235.8	232.8	175.6	177.1	174.4	218.2	219.7	219.6	232.6	231.5	231.8	225	220.9	235.5
9	234	228.6	228.4	232.8	229.7	227.9	232.6	231.1	229.1	218.3	220.2	220.2	173.5	172.4	169.3	226.3	229.1	226.1	186	183	182.3	237	235.2	230.9	175.5	178	174.5	216.9	220	217.8	232.8	231	230.7	222.2	219	236.1
9.75	231.6	228.2	230.8	232.4	230.4	226.7	232.5	231.6	228.2	219.9	220.4	219.7	172.7	173.2	169.4	225.7	229.4	227	184.3	183.1	184.5	239.5	236.9	233.7	175.3	177.6	173.8	219.4	220.4	220.4	233.2	232.2	232.5	223.7	219.5	235.3
10.5	233.4	228.6	229.8	232.8	230.6	227.1	232.5	231.3	228.4	219.5	218.9	221.8	173.8	171.5	167.4	225.4	228.7	228.9	186.2	184.4	184.5	238.2	235.4	233.6	176	179.2	173.4	220.2	220.5	219.7	232.2	231.8	231.8	224.2	220.2	237
11.25	230	224.4	224.5	223.3	218.7	214.7	218.2	216.1	213.5	222.7	220	221.3	171.7	170.1	164.2	226.8	224.3	220.7	183.4	182.2	181	225.5	223.8	220.8	176.3	175.3	171.5	211.9	208.6	207.4	238	232.8	228.4	217.6	213.3	225.3
12	229.3	224.5	224.2	223	217.8	213.8	217.4	215.5	212.4	223.1	221.6	221.5	172.2	170.2	164.2	227.5	224.2	220.9	183.7	182.3	180.3	226.4	224.5	221.6	174.6	173.1	171.3	212.3	209	207.5	238.2	232.8	232.4	218.2	211.4	224.3
12.75	231	223.9	223.1	223.2	217.9	213	218.1	213.4	209.5	226.4	221.7	220.2	172.8	168.1	164.4	228	224.2	220.8	184.5	181.5	180.8	225.5	223.9	218.5	176.2	176.3	173.1	211.3	208.3	205.3	237.5	233.1	230.3	215.7	212.5	224.1
13.5	229.8	222.3	224	222	217.5	214.7	217.8	214	209.7	223.7	221.4	219.1	172.2	169.7	165.2	228.6	224.7	222	184.9	180.3	179.8	223.9	222.1	217.5	175.2	175	171.2	210.2	207.5	207.4	238.6	231.3	229	213.5	210.4	221.8
14.25	229.9	221.5	221.8	220.6	214.4	214.7	216.9	213.7	209.6	224.5	220	220.5	171.3	168.5	163.5	225	223.7	220.9	183.7	180.8	180.4	222.6	222.6	217.8	173.6	176.6	169.9	211	207.6	208.8	237.2	232.5	230.2	213.1	208.4	221
15	229.3	219	222.2	218.9	214.3	212.1	216.9	212.4	210.3	225	220.2	220.4	172	169.3	164.2	226.1	221.6	218.6	183.8	180.5	180.2	222.2	222	217.2	175.3	174.4	170.8	211.7	206.1	204.7	235.6	233.5	227.8	212.8	207.3	222.3
15.75	228.8	221	219.5	219.9	214.2	211.6	217	212.9	207.3	223.9	220.2	219.5	172.1	170.3	166	226.5	220.6	218.3	185.2	181.6	180.7	221.4	221	217.1	174.4	174.3	172.1	211.3	204.6	204.2	235.5	231.8	228.9	212.5	206.1	221
16.5	227.6	219.4	222	217.8	215	211.4	216.2	211.7	208.5	224	217.6	221.6	170.2	168.8	165.6	224.9	221.7	220.7	184.8	182.4	180.4	222.2	219.2	217.3	173.4	175.1	170.2	209.8	205.8	203	235.1	232.9	229.1	211.9	203.6	221.8
17.25	228.9	220.6	219.8	218.8	212.2	211	216.4	210.9	208.7	223.2	219	219.4	171.8	170.1	164.3	224.4	221.8	219.2	184.7	182.6	179.8	221	219.8	217.8	175	173.9	169.3	209.2	206.6	204.5	234.6	231.7	229	212.7	203	220.1
18	228	221.9	220.1	216.7	213.2	210	214.2	211.3	206.8	222.9	216.2	218.8	171	169	164.4	224.7	220.4	217.4	183.4	181.9	180.8	220.5	221	217.5	173.4	174.4	169.6	209.9	203.7	203.6	235	233.3	230	212.6	204.9	221.3
18.75	227.7	219.3	218.1	217.8	213.4	209.1	214.9	210.5	207.9	225.2	217.1	220.5	171.1	169.6	165.7	225.9	220.3	218.5	184	181.4	180.7	221.5	220.7	217.6	174	174.2	169.6	207.9	205.4	204.5	235.8	231.3	228.1	211.7	205.3	219.2
19.5	227.9	219.2	219.8	217.1	212.4	209.8	214.1	209.6	206.6	223.6	218.4	220.1	172.3	169.3	165.9	225	222.2	217.2	183.6	181.3	179.3	220.8	220	215.6	174.6	175.5	170.5	207.5	205.6	203.3	233.1	230.2	229.7	211.6	206.2	221.1
20.25	227.1	220.7	220.7	215.6	212.4	209.8	214.7	208.4	208	223.5	218.2	222.9	170.6	168.7	164.9	226.2	219.9	218.7	183.6	180.7	181.2	221	219.7	216.1	172.8	174.5	170.6	207.7	205.3	203.8	235.2	229.2	227.4	211.5	204.5	219.9
21	227.4	219.9	220.2	217	212	208.6	213.2	208.9	207.3	224.3	219.3	222.1	169.6	171.9	164.4	224.3	221.4	217.7	183	181.4	181	219.8	220.1	217.3	172.7	174.9	169.6	207.4	206.6	203.2	232.6	231.6	228.3	210.5	205.1	219.7
21.75	226.2	219.3	222.1	216.3	212.1	211.2	214.2	210.1	206.7	223.3	221.2	220.4	169.6	169.5	164.6	224.8	221.4	219.4	183.9	181.2	180.7	220.3	221.5	217.5	172.3	174.3	168.3	207.7	205.9	203.9	233.8	231.8	228	212.3	206.1	220.1
22.5	227.5	218.9	219.1	217.5	211.8	209	210.6	209.6	207.8	222.4	219.1	221.8	169.6	168.4	164.9	225.3	221.4	219.5	183.8	181.7	179.7	221.1	220.3	216.8	174	173.6	170.2	206.7	204.8	203.8	233.4	230	226.6	211.6	205.9	218.7
23.25	225.9	220	221.6	214.6	212.5	209	213.9	208.8	207.3	225.3	220.4	222.5	170.1	167.6	164.3	226.8	221.9	219.6	184	180.7	181.1	221	220.1	215.5	173.8	174.8	169.1	207	205.3	204.1	234.2	232.4	230.2	211.8	205.1	218.9
24	226.3	221.1	220.4	216.1	212.5	211.1	213.2	209.9	207.5	225	221	222.4	171.5	169.1	166.6	224.1	223	220.6	185	181.3	180.8	220.9	222.4	218	172.3	175.3	171.8	207.5	206.4	203.3	233.8	231.6	227.6	211.2	204.6	217.7
24.75	225.5	220.7	222.5	216.3	212.4	209.3	212.4	209.2	206	224.9	219	220	169.9	168.7	163.6	224.5	221.3	220.3	182.1	181.6	181.1	221.7	221.1	215.8	174.1	173.2	169.6	207.5	205.5	203.1	234.9	230.4	228.4	212.3	205.2	219.1
25.5	225.4	220.4	219.5	215.3	212.7	210.2	210.8	209.5	207.1	224.2	221.7	220.8	170.2	168.8	164.6	225.1	221.2	220.4	185.2	182.7	180	220.8	219	215.6	171.7	175	171.6	208.6	206	204.5	234.4	229.4	228.5	211.8	205.4	220
26.25	226.1	218.6	220.8	216.5	213.8	210.2	211.8	209.8	205.5	225.1	222.6	221.4	171.2	169	163.9	225.2	220.4	220.7	185.6	181.5	181.3	221.5	220.3	214.8	172.7	173.2	170.5	209.1	206.9	204.3	233.9	230.7	227.8	212.4	204.9	218
27	225.2	221.1	219.8	215.6	211.6	209.7	212.1	207.9	208.1	225.3	219.5	221	171.3	171.7	164.4	227.1	221.4	219	182.8	183	180.8	221.7	220.3	217.1	174.5	173.2	170.5	207.7	206.9	203.1	234.4	230.5	228.7	211.8	205.3	219.2
27.75	226.7	220.3	219.2	216.8	211.9	210.9	211.7	208.9	205.3	224.3	221	221.6	171.8	169.9	166	224.9	220.9	219	184.5	182.9	180.1	219.5	219.4	215.4	174.3	174.2	171.4	209.5	207.7	204.7	234.2	230.7	227.2	211.2	205.4	218.4
28.5	224.1	219.8	221	214.4	213	210.8	212.4	210.9	205.9	224.8	220.6	222.1	171.4	169.2	163.8	225.2	221.4	219.5	183.7	181.3	182.3	221.1	219	216.2	172.8	174.7	170.4	208.9	207.2	205.1	234.6	229.7	226.9	211.4	204.7	218.9
29.25	223.4	219.2	220.7	215.2	212.6	209.9	211.9	209.6	205.7	226.2	221.4	220.9	170.8	169.1	163.8	225.1	221.2	219.1	184.5	183.5	183.2	221.2	219.3	214.3	173.9	174.8	173.1	206.8	206.3	202.2	233.8	230.8	227.2	210.2	204.5	219.5
30	226.1	220.1	220.8	215.8	211.7	209.6	210.4	210.2	206.5	224.9	221	221.6	170.6	170	166.6	225.4	221.7	219.6	184.2	181.8	181.5	220.2	220.3	215.6	173.9	174.1	168.9	207.5	207.4	202.6	234	230.4	228.5	211.3	206.1	218.5

[truncated: 3 more sheets: Fig 7I-1, Fig 7I-2, Fig 7I-3]
