# Supplementary material for: Allelic strengths of encephalopathy-associated UBA5 variants correlate between in vivo and in vitro assays
Source: eLife. 2023 Dec 11;12:RP89891. doi: 10.7554/eLife.89891 (PMC10712953; doi:10.7554/eLife.89891)
Supplement: Supplementary file 1. [file elife-89891-supp1.xlsx]

## Sheet: Sheet1
Table 2. Clinical features of individuals with UBA5-associated DEE44
	Frequency	This study	Briere et al. (2021)					Low et al. (2019)	Mignon-Ravix et al. (2018)	Diada et al. (2018)	Arnadottir et al. (2017)		Colin et al. (2016)					Muona et al. (2016)
											II-2	II-3	AII-1	AII-2	BII-2	CII-1	DII-2	A-4	A-6	B-3	B-5	B-8	B-10	C-4	D-3	E-3
Sex, age		M, 3y	F, 8y	F, 7y	M, 19y	F, 16y	F, 7y	F, 3.6y	M, d.16d	M, ~7y	F, ~13y	F, ~11y	M, 5y	M, 4y	F, 2.5y	F, 6y	F, 6y	M, d.5y	F, 3y	F, 42y	M, d.16y	M, d.21y	M, d.12y	M, 16y	F, 6y	M, 10y
Variants		M57V/ Q312L	A371T/ C303R	A371T/ R188*	A371T/L254P		A371T/ C303R	D389G/deletion	Y53F/Y53F	R72C/ deletion	A371T/A228=		A371T/ Q302*		A371T/ K324Nfs*14	V260M/ D389Y	M57V/ G168E	A371T/R55H		A371T/Y258*				A371T/ R188*	A371T/ R61*	A371T/ R188*
Hypotonia	22/24 (92%)	+	+	+	+	+	+	-	+	-	+	+	+	+	+	+	+	+	+	+	+	+	+	U	+	+
Hypertonia / spasticity	20/22 (91%)	+	+	+	+	+	+	+	U	+	U	U	+	+	-	-	+	+	+	+	+	+	+	+	+	+
Movement disorder	21/23 (91%)	+	+	+	+	+	+	+	U	-	+	+	+	+/-	-	+	+	+	+	+	+	+	+	U	+	+
Seizures (onset)	21/25 (84%)	-	+ (5.75y)	+ (5.25y)	+	+ (7mo)	+	+ (4mo)	+ (after birth)	+ (3mo)	+ (6mo)	+	+ (3mo)	+ (4mo)	+ (5mo)	-	-	+ (3mo)	+ (4mo)	+	+ (9mo)	+ (8-12mo)	+ (4mo)	+ (6mo)	-	+ (3-5mo)
GDD / ID	24/24 (100%)	+	+	+	+	+	+	+	U	+	+	+	+	+	+	+	+	+	+	+	+	+	+	+	+	+
MRI abnormalities	22/22 (100%)	+	+	+	+	+	+	+	U	+	+	+	+	+	+	+	+	+	+	+	U	U	+	+	+	+
Microcephaly	20/24 (83%)	-	-	+	+	+	+	+	-	+	+	+	+	+	+	+	+	+	+	+	+	U	+	+	+	-
Failure to thrive	20/23 (87%)	+	+	+	+	+	+	-	U	+	+	+	+	+	+	+	+	-	-	+	+	+	+	U	+	+
GDD, global developmental delay; ID, intellectual disability; U, unknown
